# Supplementary material for: Tuaimenals B–H, Merosesquiterpenes from the Irish Deep-Sea Soft Coral Duva florida with Bioactivity against Cervical Cancer Cell Lines
Source: PubMed Central journal article supplement (PMC9887596; doi:10.1021/acs.jnatprod.2c00898), 2022-12-29
Supplement: np2c00898_si_001.pdf [file np2c00898_si_001.pdf]

Supplemental Information for:

# Tuaimenals B-H, Merosesquiterpenes from the Irish Deep-Sea Soft Coral *Duva florida* with Bioactivity Against Cervical Cancer Cell Lines

*Joshua T. Welsch,<sup>†</sup> Tracess B. Smalley,<sup>‡</sup> Jenet K. Matlack,<sup>‡</sup> Nicole E. Avalon,<sup>†</sup> Jennifer M.*

*Binning,<sup>‡</sup> Mark P. Johnson,<sup>§</sup> A. Louise Allcock,<sup>§</sup> Bill J. Baker<sup>†</sup>*

<sup>†</sup> Department of Chemistry, University of South Florida, Tampa, FL, USA.

<sup>‡</sup> Molecular Oncology, Moffitt Cancer Research Center, Tampa, FL, USA.

<sup>§</sup> Department of Zoology, National University of Ireland Galway, Galway, Ireland.

|                                                                                         | Page |
|-----------------------------------------------------------------------------------------|------|
| Figure S1: Tuaimenal B (1) <sup>1</sup> H NMR spectrum (600 MHz, CDCl <sub>3</sub> ).   | 4    |
| Figure S2: Tuaimenal B (1) <sup>13</sup> C NMR spectrum (150 MHz, CDCl <sub>3</sub> ).  | 5    |
| Figure S3: Tuaimenal B (1) HSQC NMR spectrum (500 MHz, CDCl <sub>3</sub> ).             | 5    |
| Figure S4: Tuaimenal B (1) HMBC NMR spectrum (500 MHz, CDCl <sub>3</sub> ).             | 6    |
| Figure S5: Tuaimenal B (1) COSY NMR spectrum (500 MHz, CDCl <sub>3</sub> ).             | 6    |
| Figure S6: Tuaimenal B (1) NOESY NMR spectrum (500 MHz, CDCl <sub>3</sub> ).            | 7    |
| Figure S7: Tuaimenal B (1) zoomed NOESY NMR spectrum (500 MHz, CDCl <sub>3</sub> ).     | 7    |
| Figure S8: Tuaimenal B (1) HRESIMS (neg).                                               | 8    |
| Figure S9: Tuaimenal B (1) UV λ <sub>max</sub> (C <sub>2</sub> H <sub>3</sub> N).       | 8    |
| Figure S10: Tuaimenal B (1) IR spectrum (thin film).                                    | 9    |
| Figure S11: Tuaimenal C (2) <sup>1</sup> H NMR spectrum (800 MHz, CDCl <sub>3</sub> ).  | 9    |
| Figure S12: Tuaimenal C (2) <sup>13</sup> C NMR spectrum (200 MHz, CDCl <sub>3</sub> ). | 10   |
| Figure S13: Tuaimenal C (2) HSQC NMR spectrum (800 MHz, CDCl <sub>3</sub> ).            | 10   |
| Figure S14: Tuaimenal C (2) HMBC NMR spectrum (800 MHz, CDCl <sub>3</sub> ).            | 11   |
| Figure S15: Tuaimenal C (2) COSY NMR spectrum (800 MHz, CDCl <sub>3</sub> ).            | 11   |
| Figure S16: Tuaimenal C (2) NOESY NMR spectrum (800 MHz, CDCl <sub>3</sub> ).           | 12   |

|                                                                                                |    |
|------------------------------------------------------------------------------------------------|----|
| Figure S17: Tuaimenal C (2) zoomed NOESY NMR spectrum (800 MHz, CDCl <sub>3</sub> ).           | 12 |
| Figure S18: Tuaimenal C (2) HREIMS.                                                            | 13 |
| Figure S19: Tuaimenal C (2) UV $\lambda_{\max}$ (C <sub>2</sub> H <sub>3</sub> N).             | 13 |
| Figure S20: Tuaimenal C (2) IR spectrum (thin film).                                           | 14 |
| Figure S21: Tuaimenal D (3) <sup>1</sup> H NMR spectrum (600 MHz, CDCl <sub>3</sub> ).         | 14 |
| Figure S22: Tuaimenal D (3) <sup>13</sup> C NMR spectrum (150 MHz, CDCl <sub>3</sub> ).        | 15 |
| Figure S23: Tuaimenal D (3) <sup>13</sup> C NMR spectrum zoomed (150 MHz, CDCl <sub>3</sub> ). | 15 |
| Figure S24: Tuaimenal D (3) HSCQ NMR spectrum (500 MHz, CDCl <sub>3</sub> ).                   | 16 |
| Figure S25: Tuaimenal D (3) HMBC NMR spectrum (500 MHz, CDCl <sub>3</sub> ).                   | 16 |
| Figure S26: Tuaimenal D (3) COSY NMR spectrum (500 MHz, CDCl <sub>3</sub> ).                   | 17 |
| Figure S27: Tuaimenal D (3) NOESY NMR spectrum (500 MHz, CDCl <sub>3</sub> ).                  | 17 |
| Figure S28: Tuaimenal D (3) zoomed NOESY NMR spectrum (500 MHz, CDCl <sub>3</sub> ).           | 18 |
| Figure S29: Tuaimenal D (3) HRESIMS (neg).                                                     | 18 |
| Figure S30: Tuaimenal D (3) UV $\lambda_{\max}$ (C <sub>2</sub> H <sub>3</sub> N).             | 19 |
| Figure S31: Tuaimenal D (3) IR spectrum (thin film).                                           | 19 |
| Figure S32: Tuaimenal E (4) <sup>1</sup> H NMR spectrum (600 MHz, CDCl <sub>3</sub> ).         | 20 |
| Figure S33: Tuaimenal E (4) <sup>13</sup> C NMR spectrum (150 MHz, CDCl <sub>3</sub> ).        | 20 |
| Figure S34: Tuaimenal E (4) HSCQ NMR spectrum (500 MHz, CDCl <sub>3</sub> ).                   | 21 |
| Figure S35: Tuaimenal E (4) HMBC NMR spectrum (500 MHz, CDCl <sub>3</sub> ).                   | 21 |
| Figure S36: Tuaimenal E (4) COSY NMR spectrum (500 MHz, CDCl <sub>3</sub> ).                   | 22 |
| Figure S37: Tuaimenal E (4) NOESY NMR spectrum (500 MHz, CDCl <sub>3</sub> ).                  | 22 |
| Figure S38: Tuaimenal E (4) zoomed NOESY NMR spectrum (500 MHz, CDCl <sub>3</sub> ).           | 23 |
| Figure S39: Tuaimenal E (4) HRESIMS (neg).                                                     | 23 |
| Figure S40: Tuaimenal E (4) UV $\lambda_{\max}$ (C <sub>2</sub> H <sub>3</sub> N).             | 24 |
| Figure S41: Tuaimenal E (4) IR spectrum (thin film).                                           | 24 |
| Figure S42: Tuaimenal F (5) <sup>1</sup> H NMR spectrum (600 MHz, CDCl <sub>3</sub> ).         | 25 |
| Figure S43: Tuaimenal F (5) <sup>13</sup> C NMR spectrum (150 MHz, CDCl <sub>3</sub> ).        | 25 |
| Figure S44: Tuaimenal F (5) HSCQ NMR spectrum (500 MHz, CDCl <sub>3</sub> ).                   | 26 |
| Figure S45: Tuaimenal F (5) HMBC NMR spectrum (500 MHz, CDCl <sub>3</sub> ).                   | 26 |
| Figure S46: Tuaimenal F (5) COSY NMR spectrum (500 MHz, CDCl <sub>3</sub> ).                   | 27 |
| Figure S47: Tuaimenal F (5) NOESY NMR spectrum (500 MHz, CDCl <sub>3</sub> ).                  | 27 |
| Figure S48: Tuaimenal F (5) zoomed NOESY NMR spectrum (500 MHz, CDCl <sub>3</sub> ).           | 28 |
| Figure S49: Tuaimenal F (5) HRESIMS (neg).                                                     | 28 |
| Figure S50: Tuaimenal F (5) UV $\lambda_{\max}$ (C <sub>2</sub> H <sub>3</sub> N).             | 29 |
| Figure S51: Tuaimenal F (5) IR spectrum (thin film).                                           | 29 |
| Figure S52: Tuaimenal G (6) <sup>1</sup> H NMR spectrum (600 MHz, CDCl <sub>3</sub> ).         | 30 |
| Figure S53: Tuaimenal G (6) <sup>13</sup> C NMR spectrum (150 MHz, CDCl <sub>3</sub> ).        | 30 |
| Figure S54: Tuaimenal G (6) HSCQ NMR spectrum (500 MHz, CDCl <sub>3</sub> ).                   | 31 |
| Figure S55: Tuaimenal G (6) HMBC NMR spectrum (500 MHz, CDCl <sub>3</sub> ).                   | 31 |
| Figure S56: Tuaimenal G (6) COSY NMR spectrum (500 MHz, CDCl <sub>3</sub> ).                   | 32 |
| Figure S57: Tuaimenal G (6) NOESY NMR spectrum (500 MHz, CDCl <sub>3</sub> ).                  | 32 |
| Figure S58: Tuaimenal G (6) zoomed NOESY NMR spectrum (500 MHz, CDCl <sub>3</sub> ).           | 33 |
| Figure S59: Tuaimenal G (6) HRESIMS (pos).                                                     | 33 |
| Figure S60: Tuaimenal G (6) UV $\lambda_{\max}$ (C <sub>2</sub> H <sub>3</sub> N).             | 34 |
| Figure S61: Tuaimenal G (6) IR spectrum (thin film).                                           | 34 |
| Figure S62: Tuaimenal H (7) <sup>1</sup> H NMR spectrum (600 MHz, CDCl <sub>3</sub> ).         | 35 |

|                                                                                                                                                                                        |    |
|----------------------------------------------------------------------------------------------------------------------------------------------------------------------------------------|----|
| Figure S63: Tuaimenal H (7) $^{13}\text{C}$ NMR spectrum (150 MHz, $\text{CDCl}_3$ ).                                                                                                  | 35 |
| Figure S64: Tuaimenal H (7) HSCQ NMR spectrum (500 MHz, $\text{CDCl}_3$ ).                                                                                                             | 36 |
| Figure S65: Tuaimenal H (7) HMBC NMR spectrum (500 MHz, $\text{CDCl}_3$ ).                                                                                                             | 36 |
| Figure S66: Tuaimenal H (7) COSY NMR spectrum (500 MHz, $\text{CDCl}_3$ ).                                                                                                             | 37 |
| Figure S67: Tuaimenal H (7) NOESY NMR spectrum (500 MHz, $\text{CDCl}_3$ ).                                                                                                            | 37 |
| Figure S68: Tuaimenal H (7) zoomed NOESY NMR spectrum (500 MHz, $\text{CDCl}_3$ ).                                                                                                     | 38 |
| Figure S69: Tuaimenal H (7) HRESIMS (neg).                                                                                                                                             | 38 |
| Figure S70: Tuaimenal H (7) UV $\lambda_{\text{max}}$ ( $\text{C}_2\text{H}_3\text{N}$ ).                                                                                              | 39 |
| Figure S71: Tuaimenal H (7) IR spectrum (thin film).                                                                                                                                   | 39 |
| Figure S72: 3-hydroxy-19-norchola-1,3,5(10)-trien-24-oic acid (8) $^1\text{H}$ NMR spectrum (600 MHz, MeOD).                                                                           | 40 |
| Figure S73: 3-hydroxy-19-norchola-1,3,5(10)-trien-24-oic acid (8) $^{13}\text{C}$ NMR spectrum (150 MHz, MeOD).                                                                        | 40 |
| Figure S74: 3-hydroxy-19-norchola-1,3,5(10)-trien-24-oic acid (8) HSCQ NMR spectrum (500 MHz, MeOD).                                                                                   | 41 |
| Figure S75: 3-hydroxy-19-norchola-1,3,5(10)-trien-24-oic acid (8) HMBC NMR spectrum (500 MHz, MeOD).                                                                                   | 41 |
| Figure S76: 3-hydroxy-19-norchola-1,3,5(10)-trien-24-oic acid (8) COSY NMR spectrum (500 MHz, MeOD).                                                                                   | 42 |
| Figure S77: 3-hydroxy-19-norchola-1,3,5(10)-trien-24-oic acid (8) NOESY NMR spectrum (500 MHz, MeOD).                                                                                  | 42 |
| Figure S78: 3-hydroxy-19-norchola-1,3,5(10)-trien-24-oic acid (8) HRESIMS (neg).                                                                                                       | 43 |
| Figure S79: 3-hydroxy-19-norchola-1,3,5(10)-trien-24-oic acid (8) UV $\lambda_{\text{max}}$ ( $\text{C}_2\text{H}_3\text{N}$ ).                                                        | 43 |
| Figure S80: 3-hydroxy-19-norchola-1,3,5(10)-trien-24-oic acid (8) IR spectrum (thin film).                                                                                             | 44 |
| Figure S81: 3-hydroxy-19-norchola-1,3,5(10)-trien-24-oic acid (8) X-ray crystal structure.                                                                                             | 44 |
| Figure S82: 3-hydroxy-19-norchola-1,3,5(10)-trien-24-oic acid (8) X-ray crystallography metadata and ellipsoid plot with anisotropic displacement parameters drawn at 50% probability. | 45 |
| Figure S83: Methyl 3-hydroxy-19-norchola-1,3,5(10)-trien-24-oic acid (9) $^1\text{H}$ NMR spectrum (600 MHz, $\text{CDCl}_3$ ).                                                        | 46 |
| Figure S84: Methyl 3-hydroxy-19-norchola-1,3,5(10)-trien-24-oic acid (9) $^{13}\text{C}$ NMR spectrum (150 MHz, $\text{CDCl}_3$ ).                                                     | 46 |
| Figure S85: Methyl 3-hydroxy-19-norchola-1,3,5(10)-trien-24-oic acid (9) HSCQ NMR spectrum (500 MHz, $\text{CDCl}_3$ ).                                                                | 47 |
| Figure S86: Methyl 3-hydroxy-19-norchola-1,3,5(10)-trien-24-oic acid (9) HMBC NMR spectrum (500 MHz, $\text{CDCl}_3$ ).                                                                | 47 |
| Figure S87: Methyl 3-hydroxy-19-norchola-1,3,5(10)-trien-24-oic acid (9) COSY NMR spectrum (500 MHz, $\text{CDCl}_3$ ).                                                                | 48 |
| Figure S88: Methyl 3-hydroxy-19-norchola-1,3,5(10)-trien-24-oic acid (9) NOESY NMR spectrum (500 MHz, $\text{CDCl}_3$ ).                                                               | 48 |
| Figure S89: Methyl 3-hydroxy-19-norchola-1,3,5(10)-trien-24-oic acid (9) HRESIMS (pos).                                                                                                | 49 |

|                                                                                                                                                                               |    |
|-------------------------------------------------------------------------------------------------------------------------------------------------------------------------------|----|
| Figure S90: 19-norchola-1,3,5(10)-trien-24-oic acid, 3-hydroxy-, methyl ester ( <b>9</b> )<br>UV $\lambda_{\max}$ (C <sub>2</sub> H <sub>3</sub> N).                          | 49 |
| Figure S91: 19-norchola-1,3,5(10)-trien-24-oic acid, 3-hydroxy-, methyl ester ( <b>9</b> )<br>IR spectrum (thin film).                                                        | 50 |
| Figure S92: Tuaimenal A ( <b>10</b> ) <sup>1</sup> H NMR spectrum (600 MHz, CDCl <sub>3</sub> ).                                                                              | 50 |
| Figure S93: Tuaimenal A ( <b>10</b> ) <sup>13</sup> C NMR spectrum (150 MHz, CDCl <sub>3</sub> ).                                                                             | 51 |
| Figure S94: Tuaimenal A ( <b>10</b> ) HSCQ NMR spectrum (500 MHz, CDCl <sub>3</sub> ).                                                                                        | 51 |
| Figure S95: Tuaimenal A ( <b>10</b> ) HMBC NMR spectrum (500 MHz, CDCl <sub>3</sub> ).                                                                                        | 52 |
| Figure S96: Tuaimenal A ( <b>10</b> ) COSY NMR spectrum (500 MHz, CDCl <sub>3</sub> ).                                                                                        | 52 |
| Figure S97: Tuaimenal A ( <b>10</b> ) NOESY NMR spectrum (500 MHz, CDCl <sub>3</sub> ).                                                                                       | 53 |
| Figure S98: Tuaimenal A ( <b>10</b> ) zoomed NOESY NMR spectrum (500 MHz, CDCl <sub>3</sub> ).                                                                                | 53 |
| Figure S99: Tuaimenal A ( <b>10</b> ) HRESIMS (neg).                                                                                                                          | 54 |
| Figure S100: Tuaimenal A ( <b>10</b> ) UV $\lambda_{\max}$ (C <sub>2</sub> H <sub>3</sub> N).                                                                                 | 54 |
| Figure S101: Tuaimenal A ( <b>10</b> ) IR spectrum (thin film).                                                                                                               | 55 |
| Table S1: Comparison of tuaimenal A ( <b>10</b> ) <sup>1</sup> H and <sup>13</sup> C spectra to literature.                                                                   | 56 |
| Table S2: Comparison of <i>Duva florida</i> steroids ( <b>8</b> and <b>9</b> ) <sup>13</sup> C NMR spectra to literature.                                                     | 57 |
| Figure S102: Integrated chromatogram displaying relative abundance of <i>R</i> and <i>S</i> enantiomers of tuaimenal E ( <b>4</b> ) separated utilizing a chiral HPLC column. | 58 |

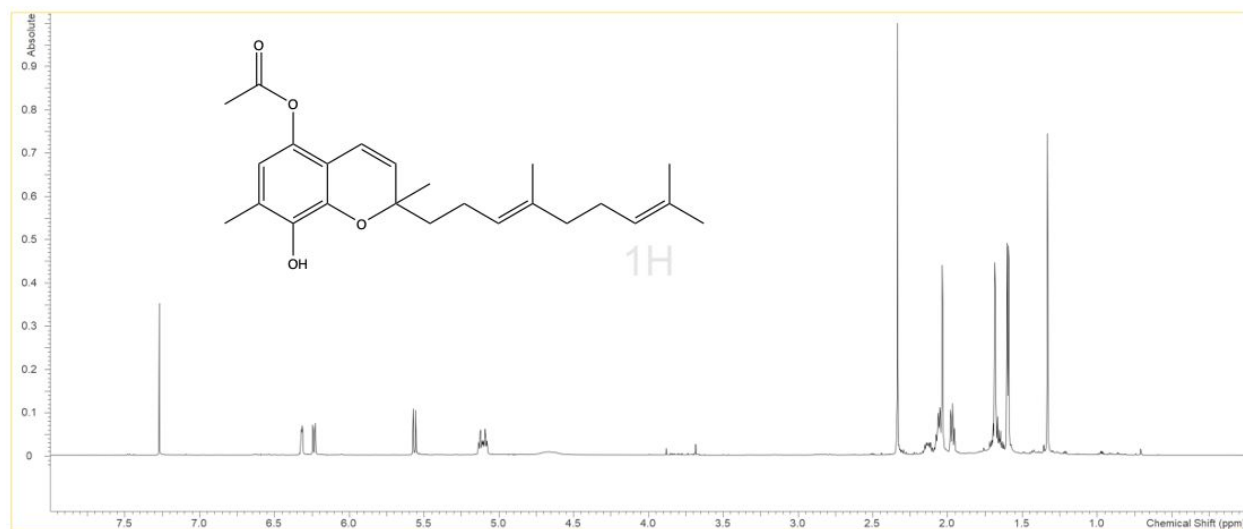

Figure S1: Tuaimenal B (**1**) <sup>1</sup>H NMR spectrum (600 MHz, CDCl<sub>3</sub>).

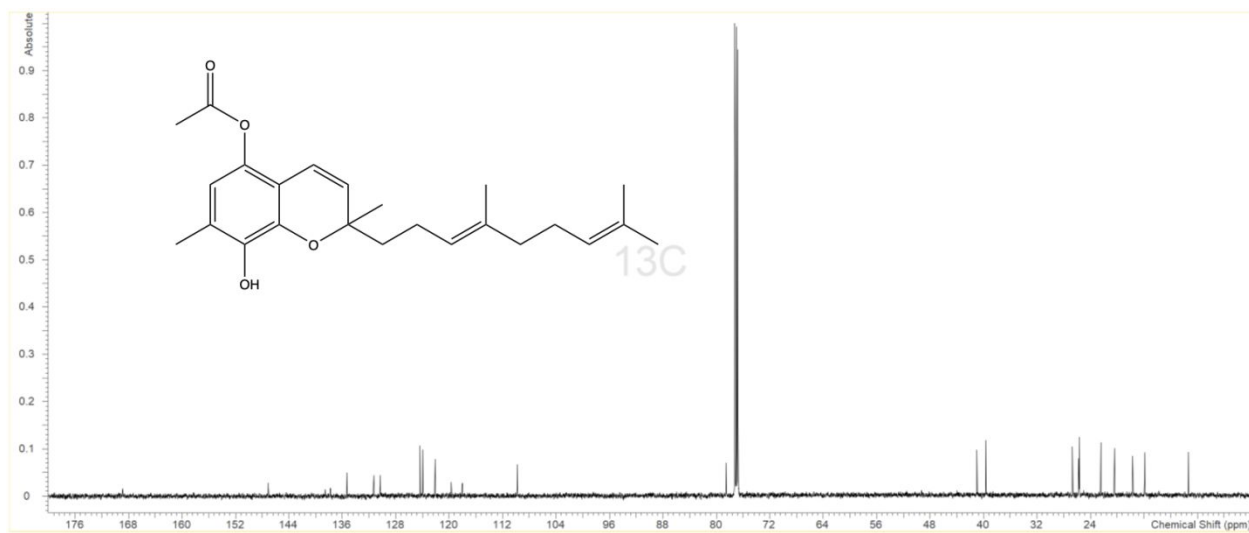

Figure S2: Tuaimenal B (1) <sup>13</sup>C NMR spectrum (150 MHz, CDCl<sub>3</sub>).

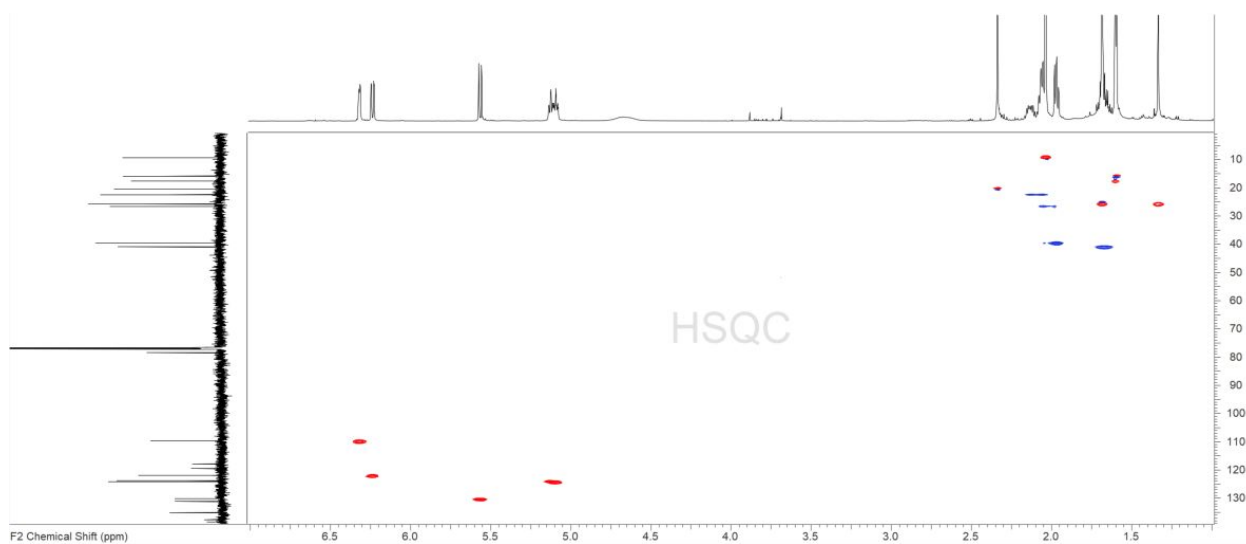

Figure S3: Tuaimenal B (1) HSQC NMR spectrum (500 MHz, CDCl<sub>3</sub>).

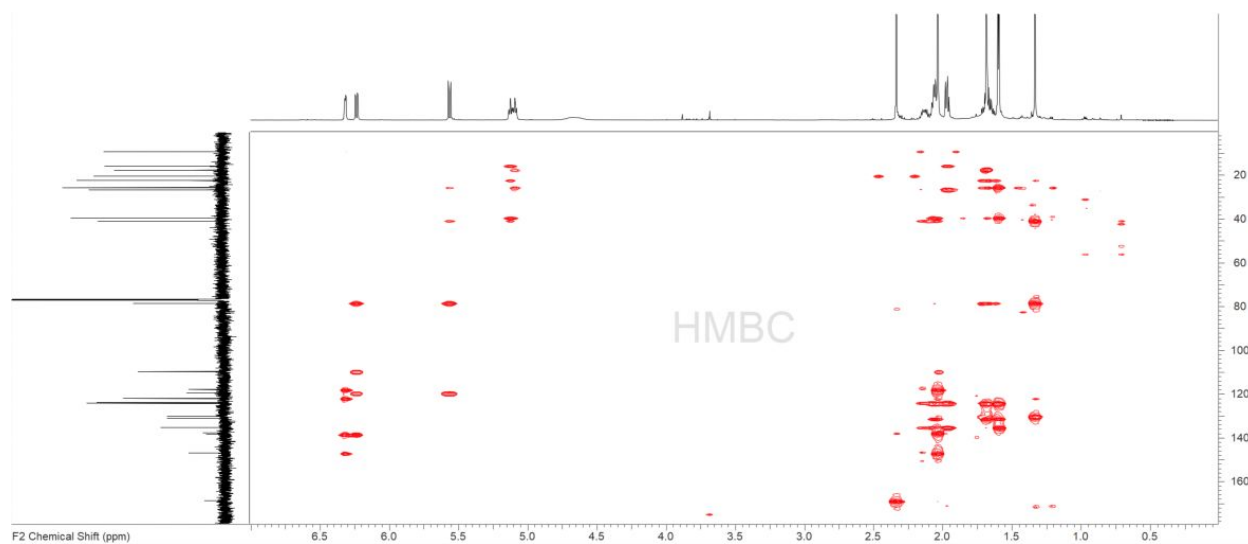

Figure S4: Tuaimenal B (1) HMBC NMR spectrum (500 MHz, CDCl<sub>3</sub>).

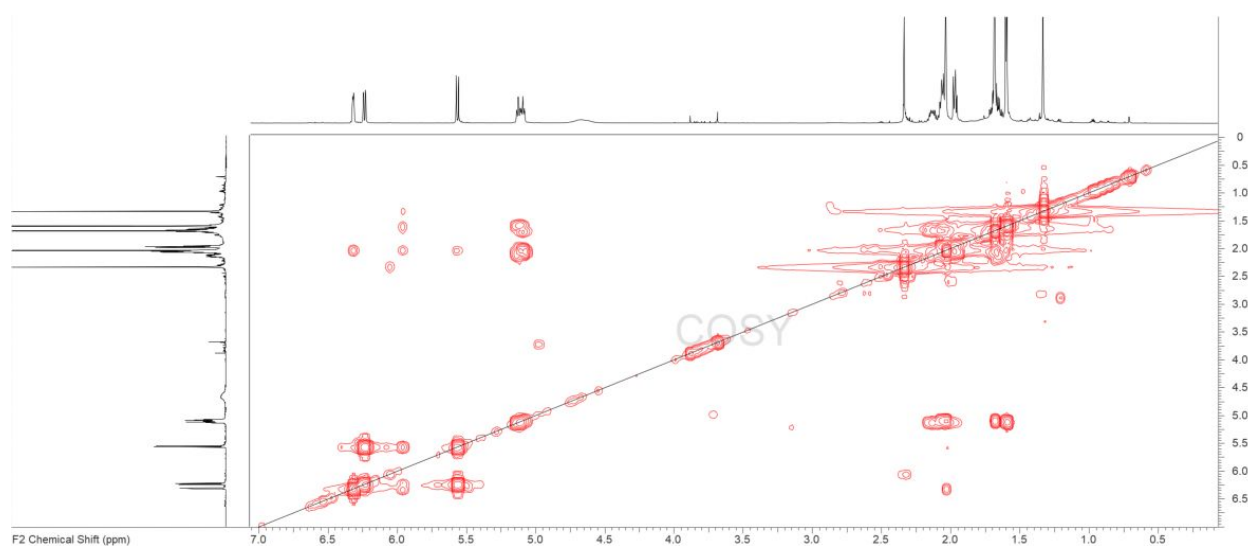

Figure S5: Tuaimenal B (1) COSY NMR spectrum (500 MHz, CDCl<sub>3</sub>).

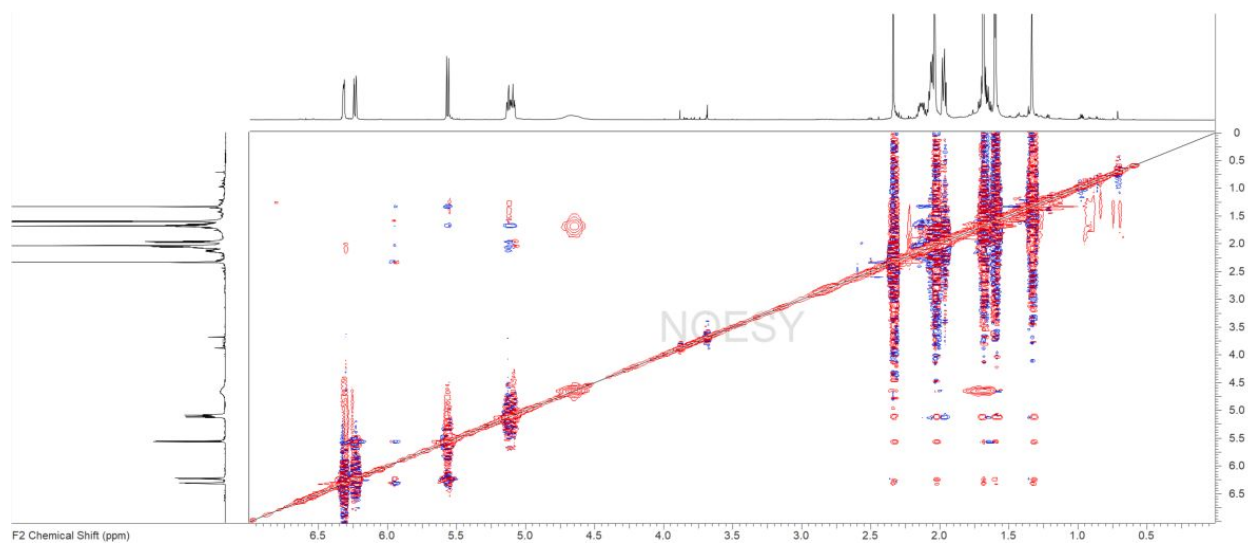

Figure S6: Tuaimenal B (**1**) NOESY NMR spectrum (500 MHz, CDCl<sub>3</sub>).

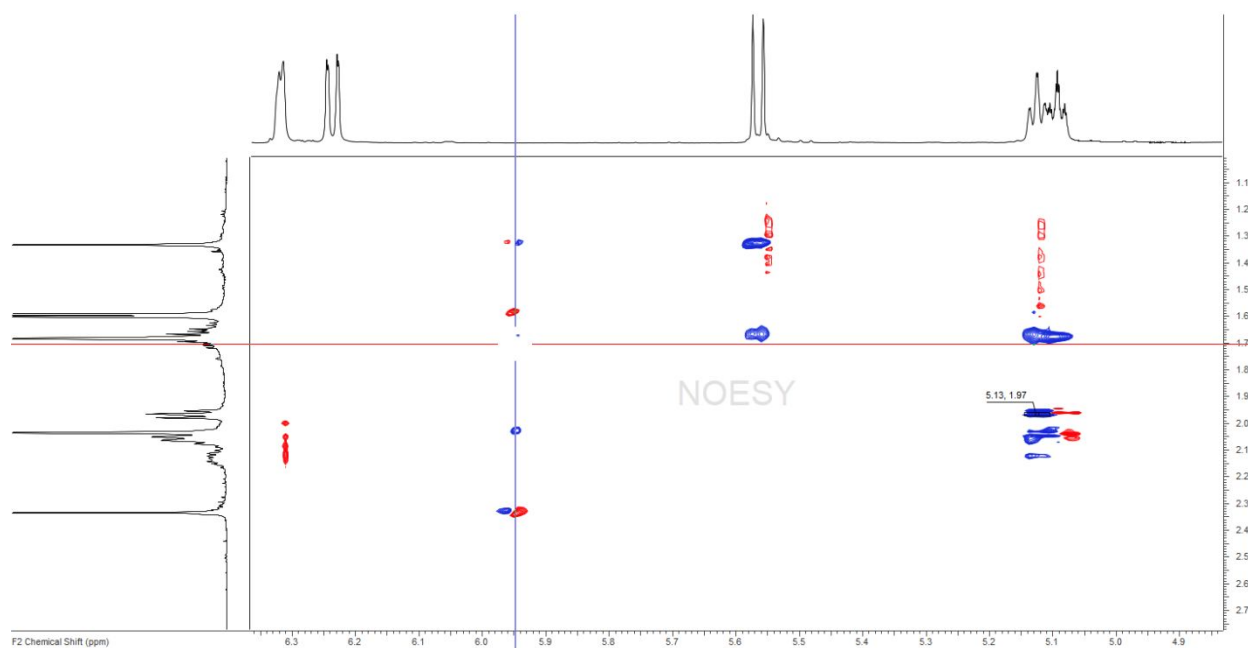

Figure S7: Tuaimenal B (**1**) zoomed NOESY NMR spectrum (500 MHz, CDCl<sub>3</sub>).

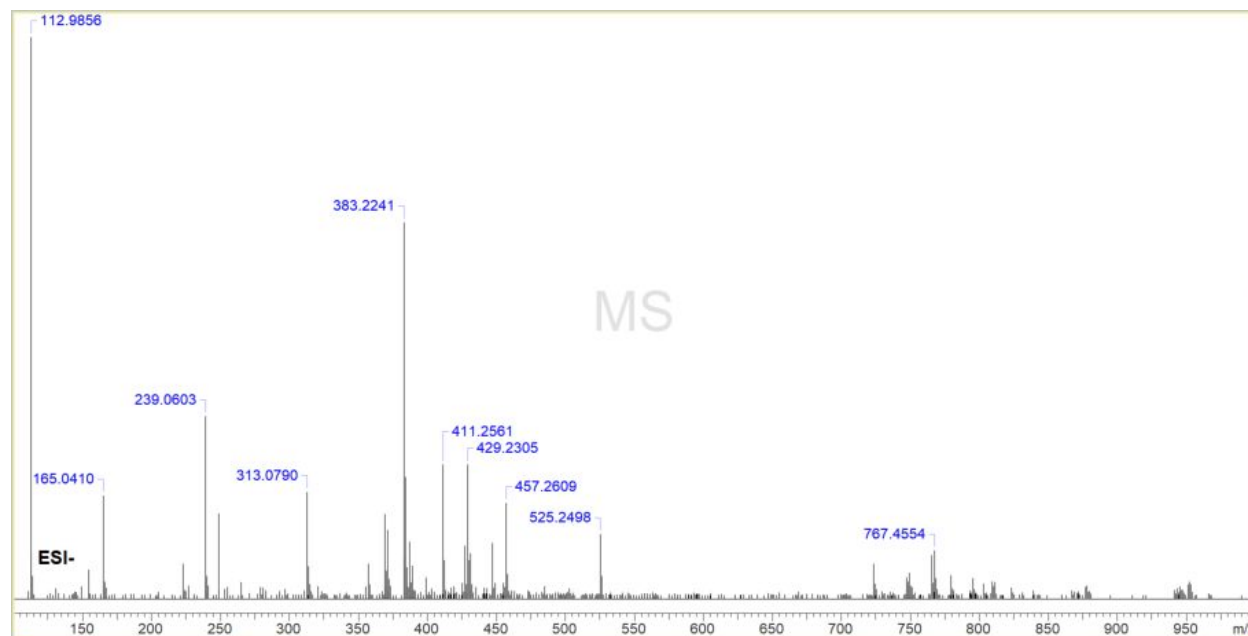

Figure S8: Tuaimenal B (1) HRESIMS (neg).

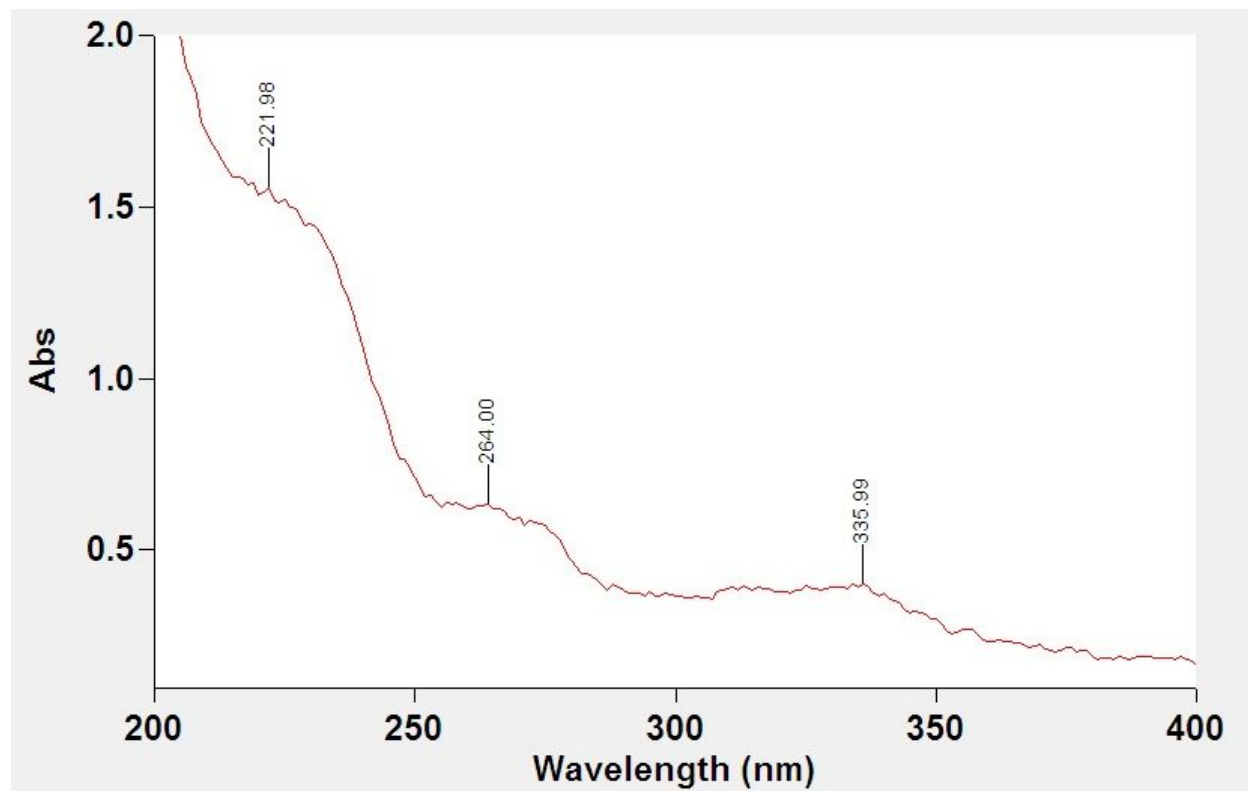

Figure S9: Tuaimenal B (1) UV  $\lambda_{\max}$  ( $C_2H_3N$ ).



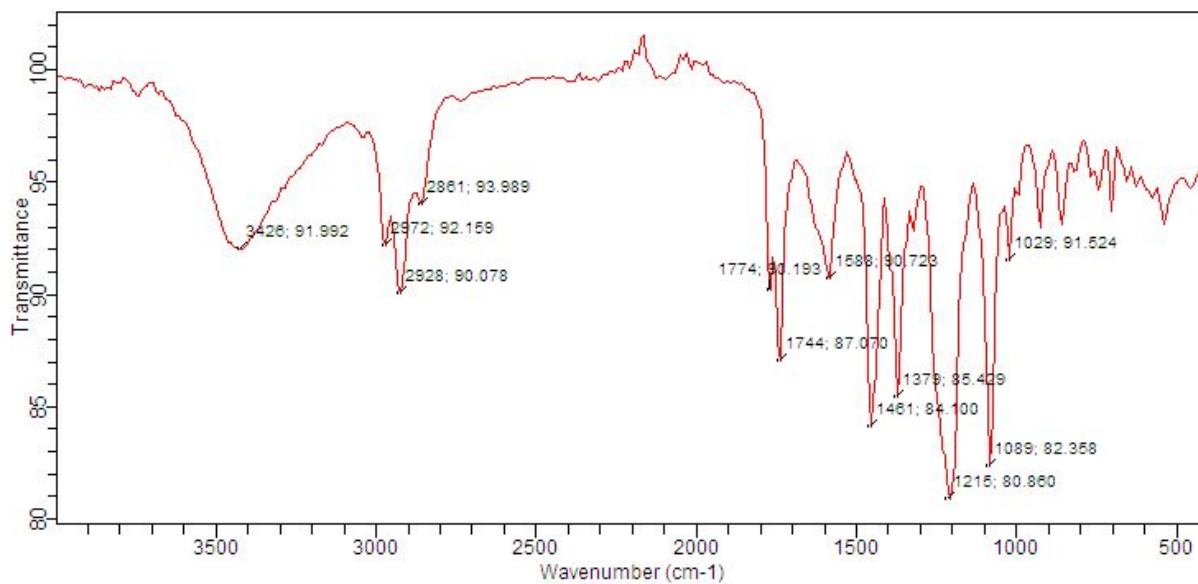

Figure S10: Tuaimenal B (**1**) IR spectrum (thin film).

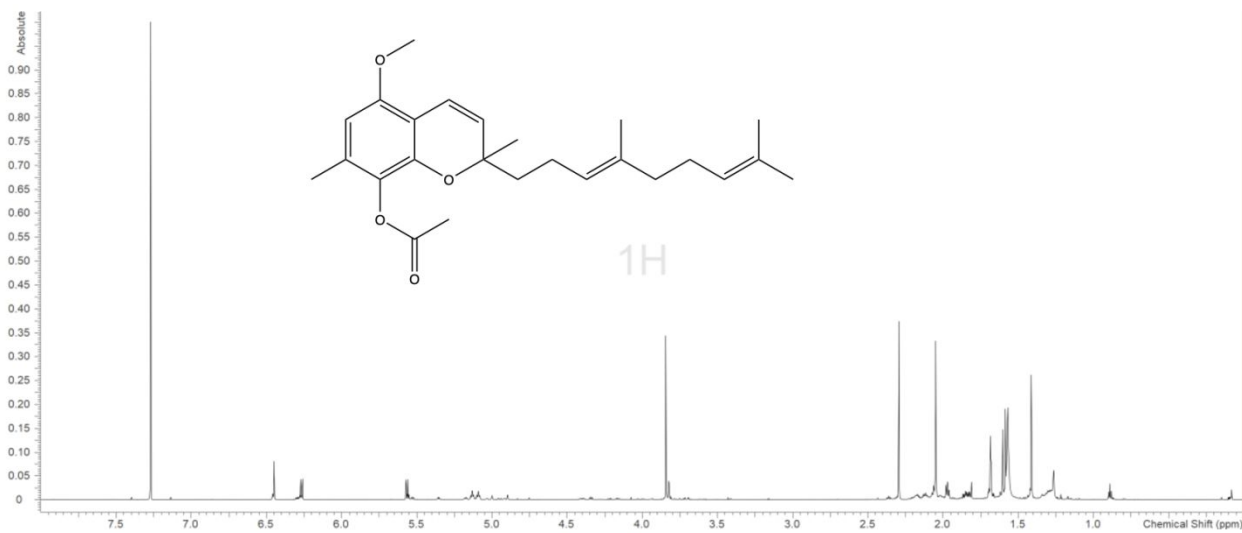

Figure S11: Tuaimenal C (**2**) <sup>1</sup>H NMR spectrum (800 MHz, CDCl<sub>3</sub>).

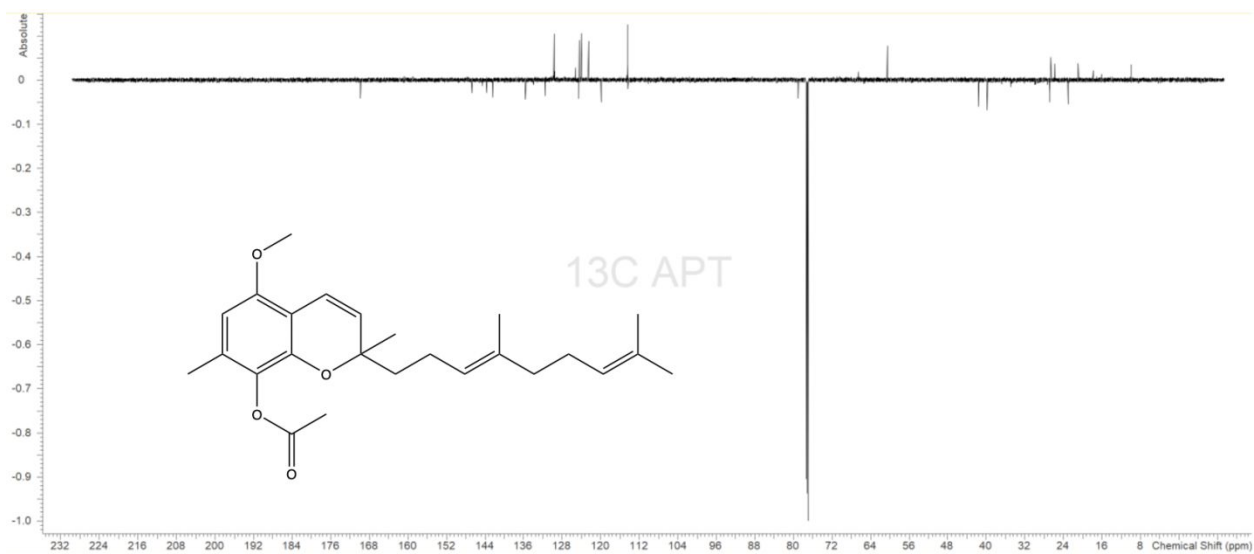

Figure S12: Tuaimenal C (**2**)  $^{13}\text{C}$  NMR spectrum (200 MHz,  $\text{CDCl}_3$ ).

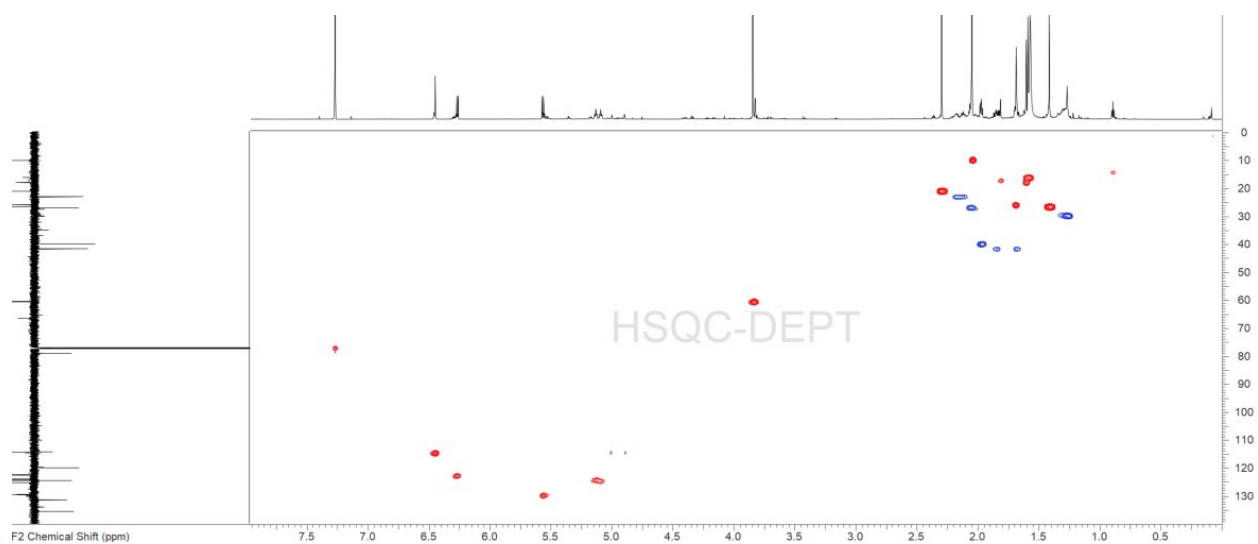

Figure S13: Tuaimenal C (**2**) HSQC NMR spectrum (800 MHz,  $\text{CDCl}_3$ ).

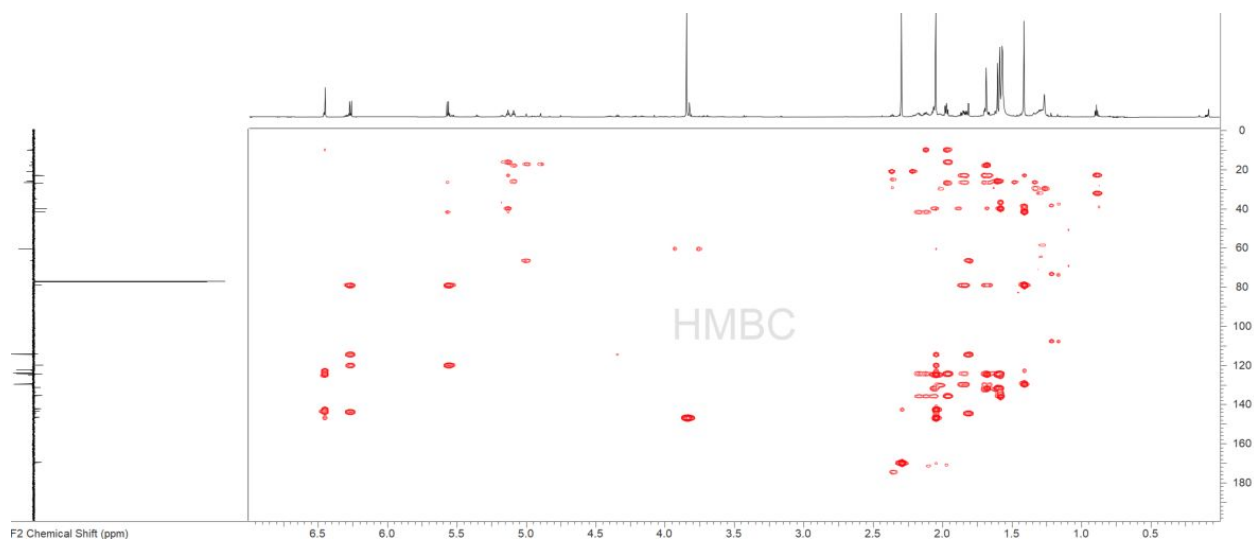

Figure S14: Tuaimenal C (**2**) HMBC NMR spectrum (800 MHz, CDCl<sub>3</sub>).

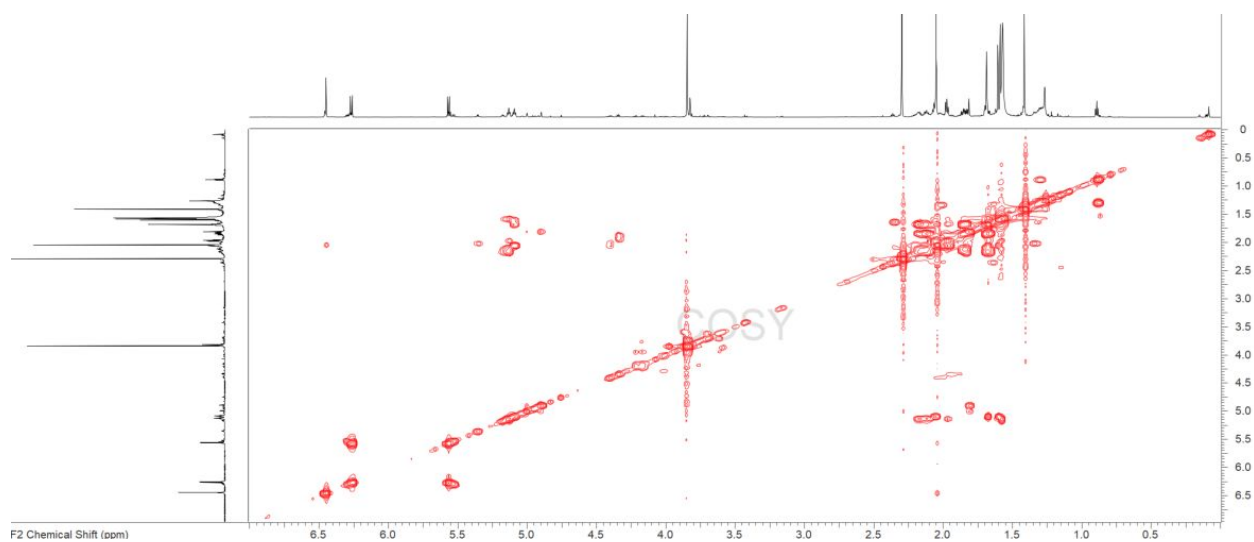

Figure S15: Tuaimenal C (**2**) COSY NMR spectrum (800 MHz, CDCl<sub>3</sub>).

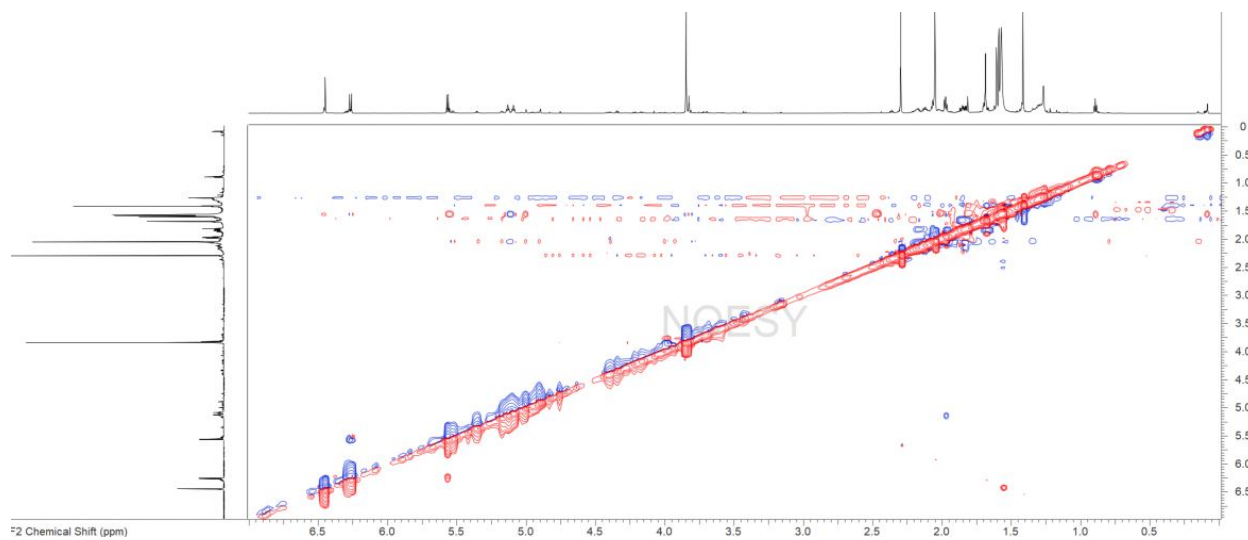

Figure S16: Tuaimenal C (**2**) NOESY NMR spectrum (800 MHz, CDCl<sub>3</sub>).

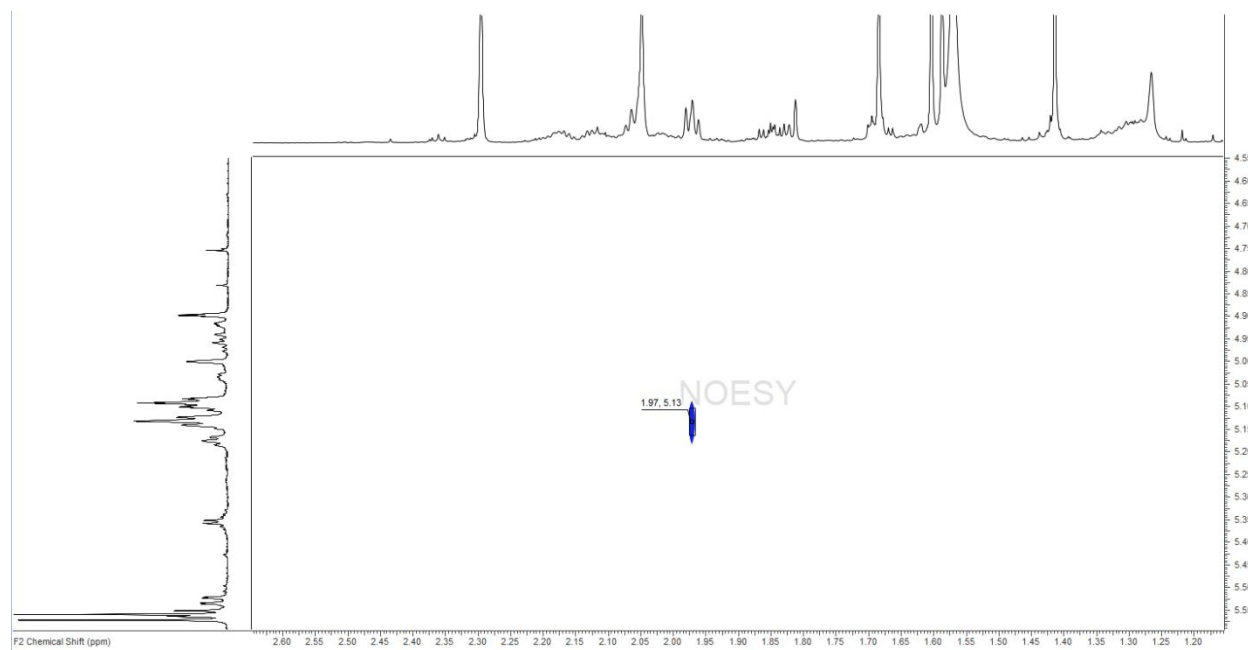

Figure S17: Tuaimenal C (**2**) zoomed NOESY NMR spectrum (800 MHz, CDCl<sub>3</sub>).

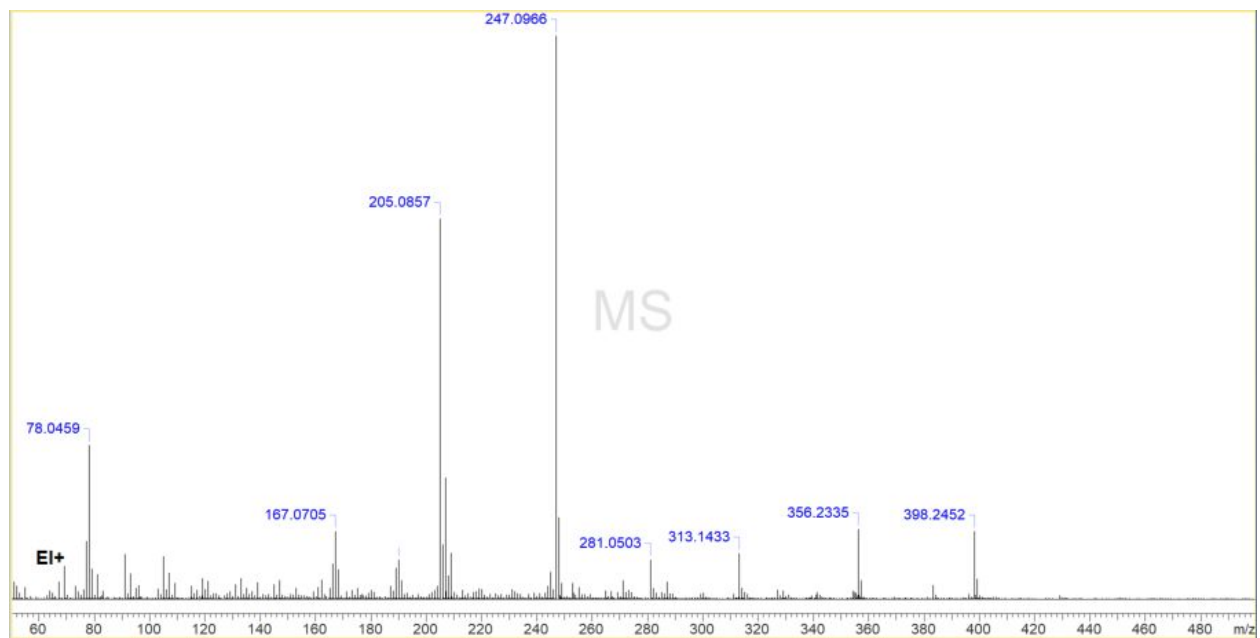

Figure S18: Tuaimenal C (2) HREIMS.

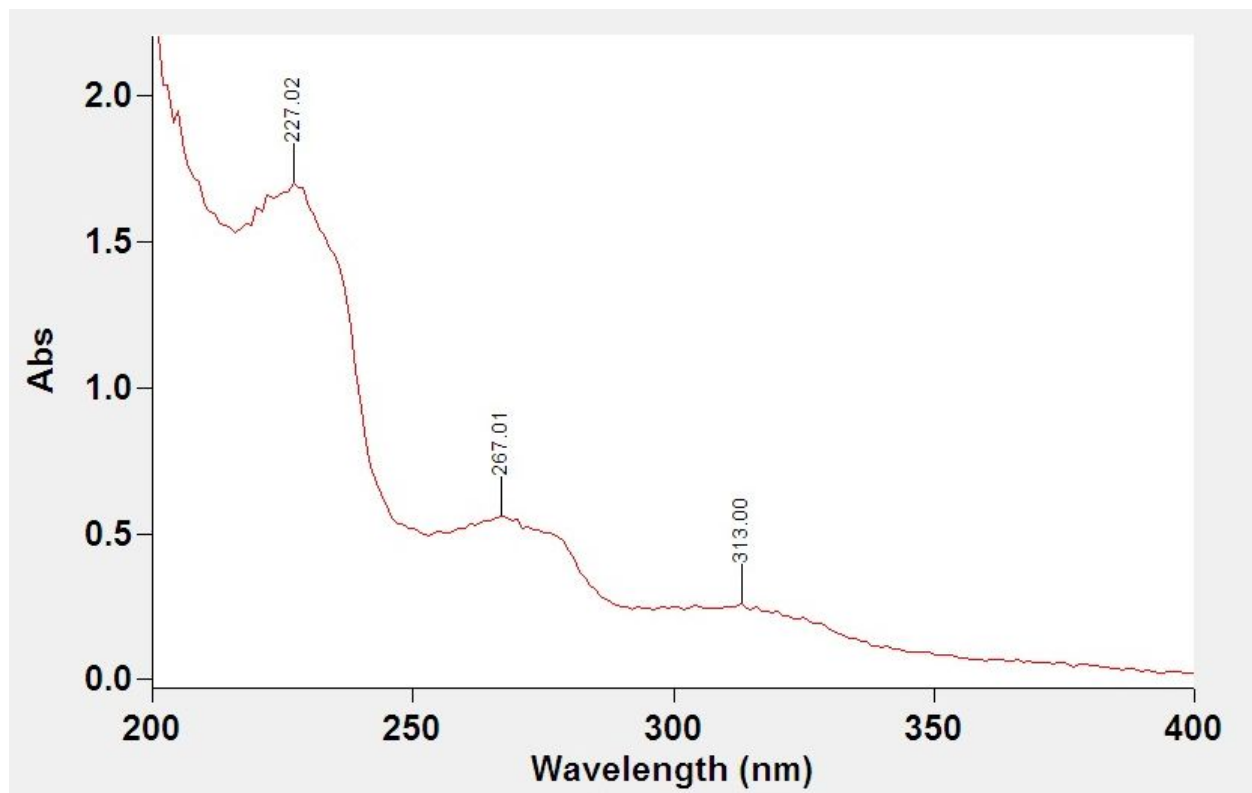

Figure S19: Tuaimenal C (2) UV  $\lambda_{\max}$  ( $C_2H_3N$ ).

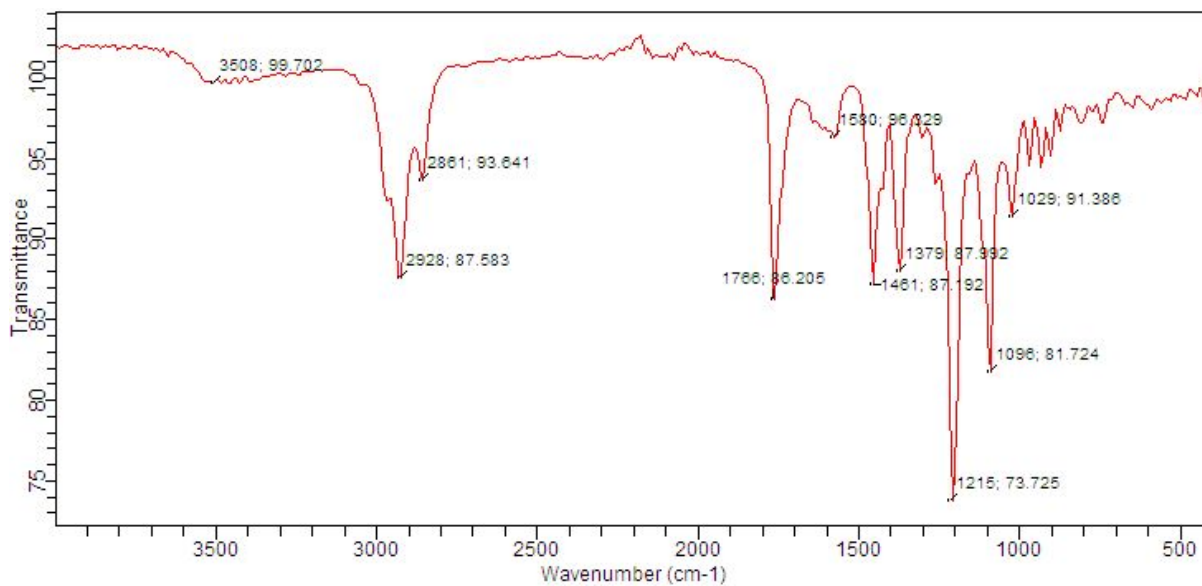

Figure S20: Tuaimenal C (**2**) IR spectrum (thin film).

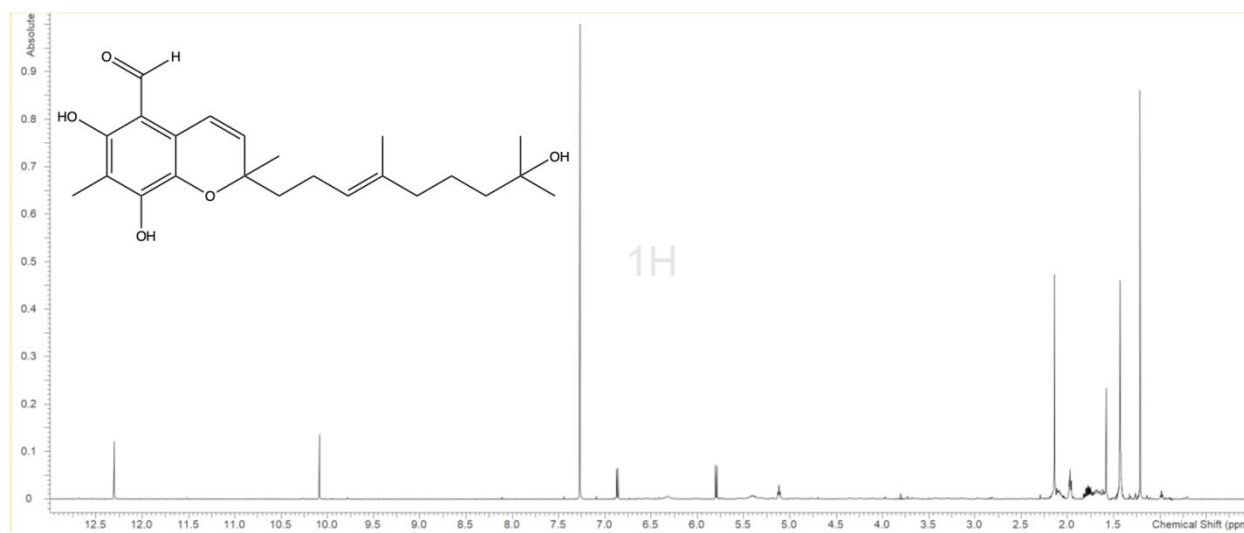

Figure S21: Tuaimenal D (**3**) <sup>1</sup>H NMR spectrum (600 MHz, CDCl<sub>3</sub>).

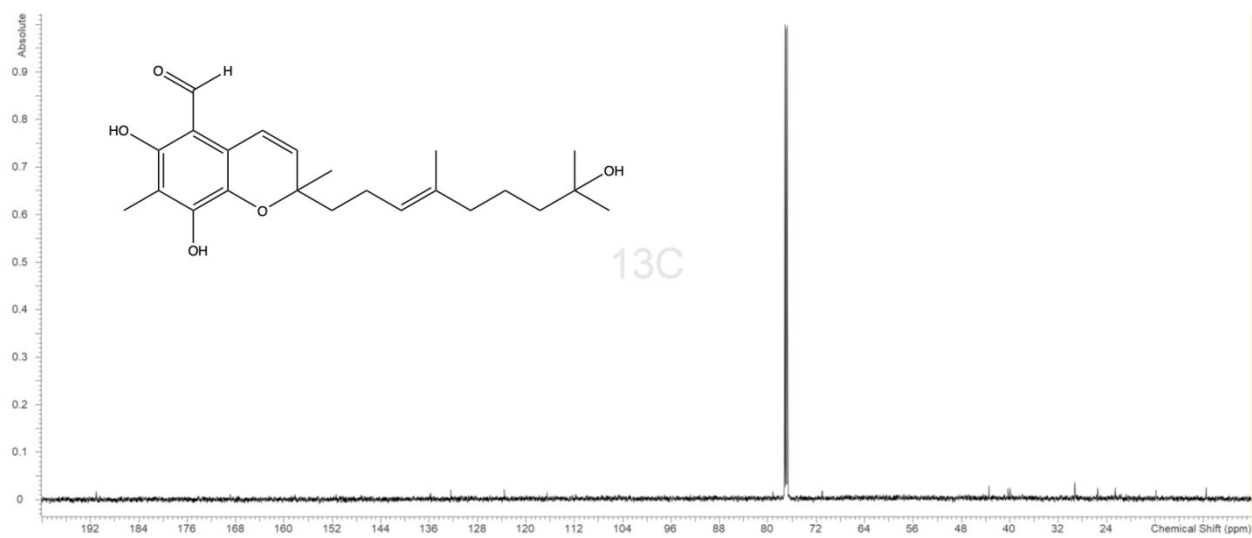

Figure S22: Tuaimenal D (**3**)  $^{13}\text{C}$  NMR spectrum (150 MHz,  $\text{CDCl}_3$ ).

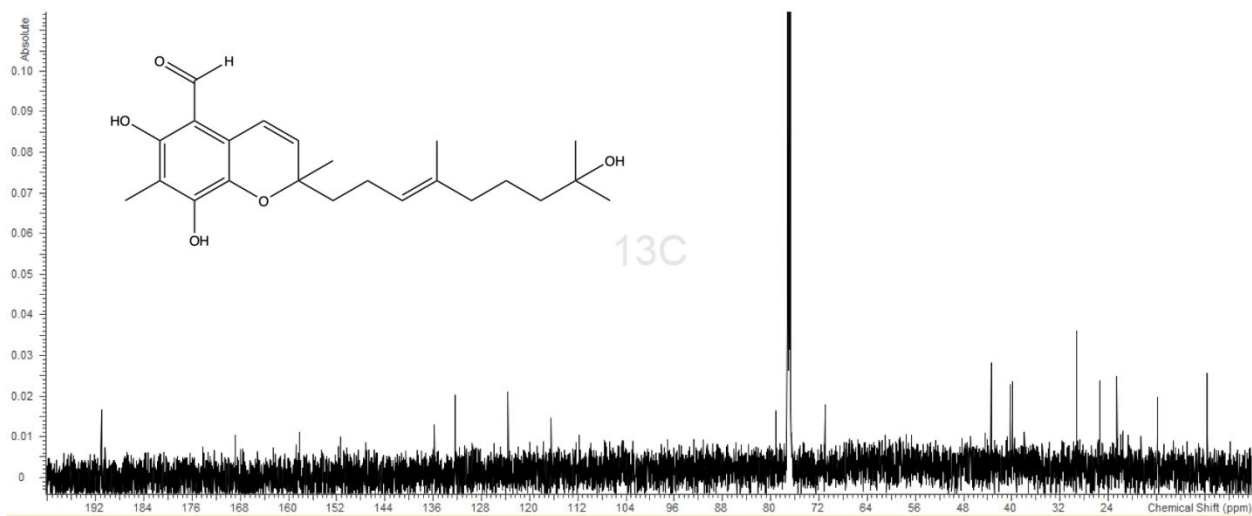

Figure S23: Tuaimenal D (**3**)  $^{13}\text{C}$  NMR spectrum zoomed (150 MHz,  $\text{CDCl}_3$ ).

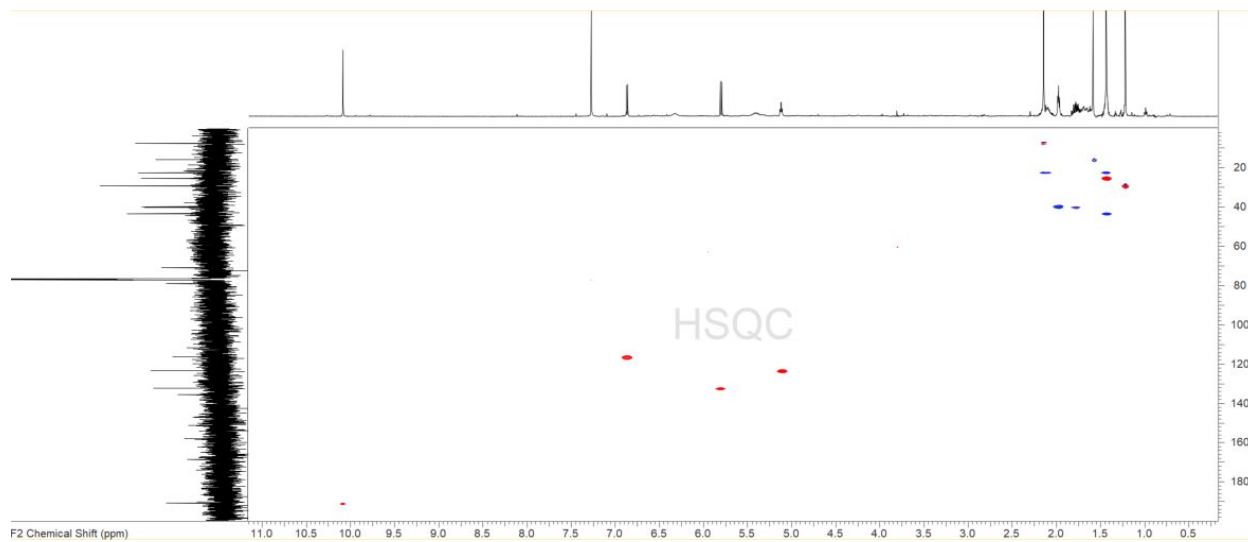

Figure S24: Tuaimenal D (**3**) HSCQ NMR spectrum (500 MHz, CDCl<sub>3</sub>).

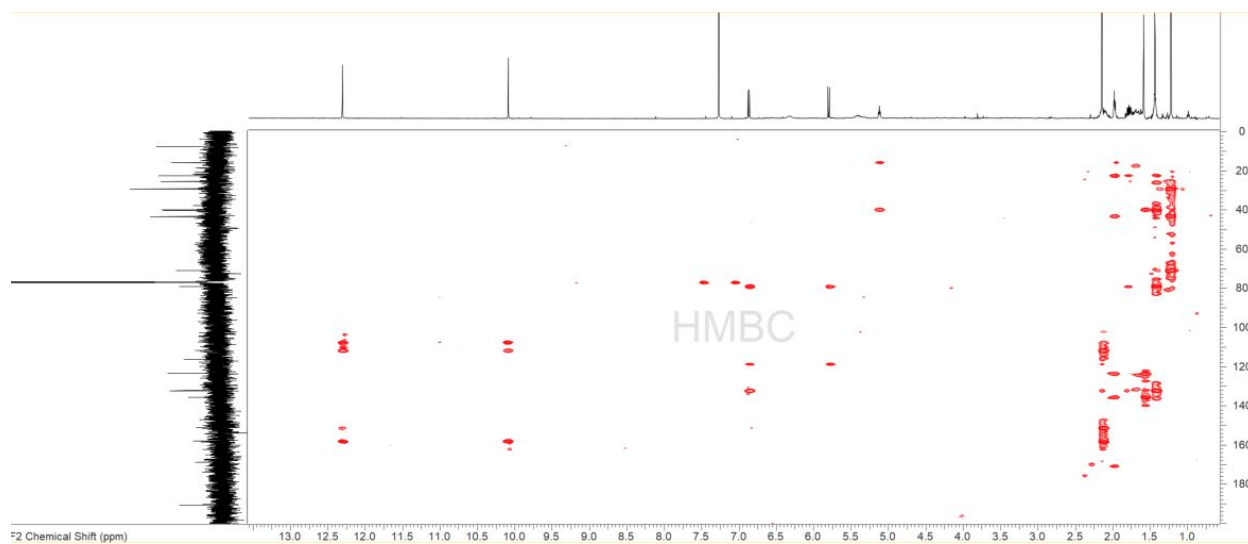

Figure S25: Tuaimenal D (**3**) HMBC NMR spectrum (500 MHz, CDCl<sub>3</sub>).



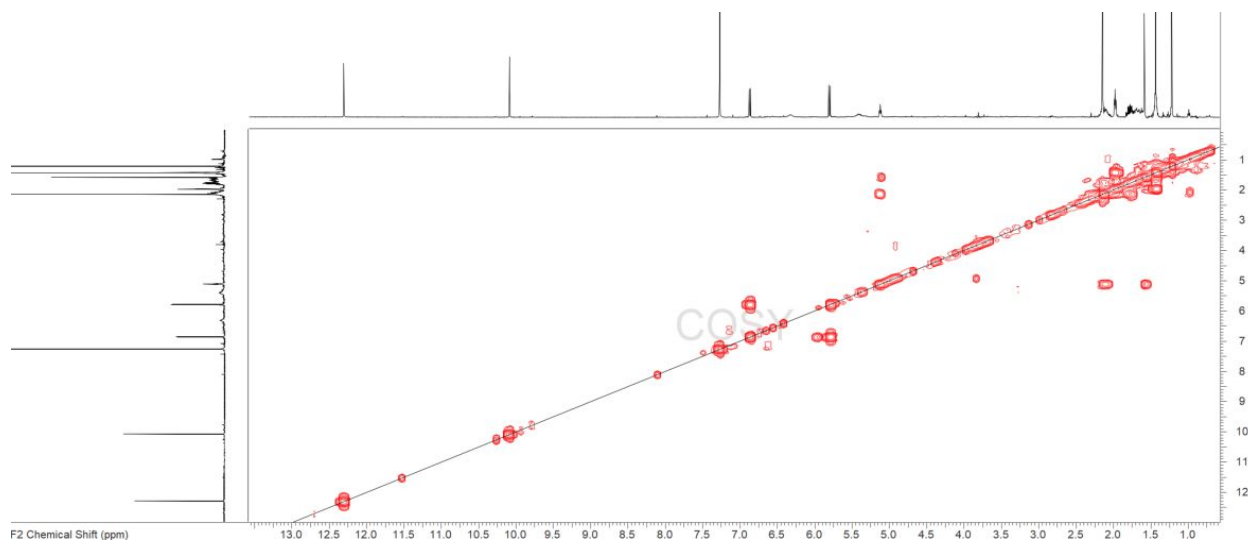

Figure S26: Tuaimenal D (**3**) COSY NMR spectrum (500 MHz, CDCl<sub>3</sub>).

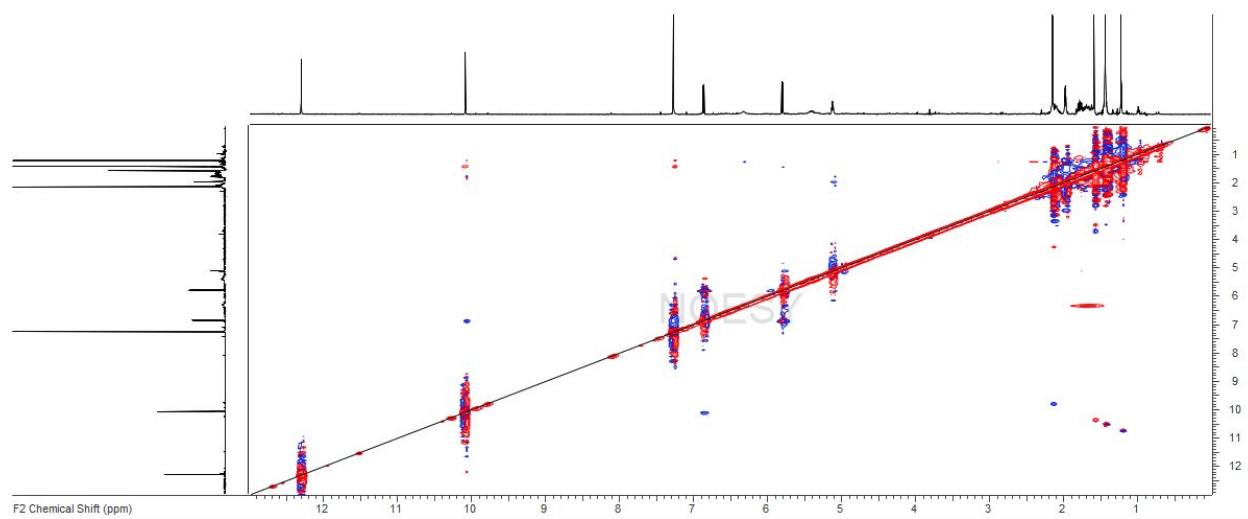

Figure S27: Tuaimenal D (**3**) NOESY NMR spectrum (500 MHz, CDCl<sub>3</sub>).

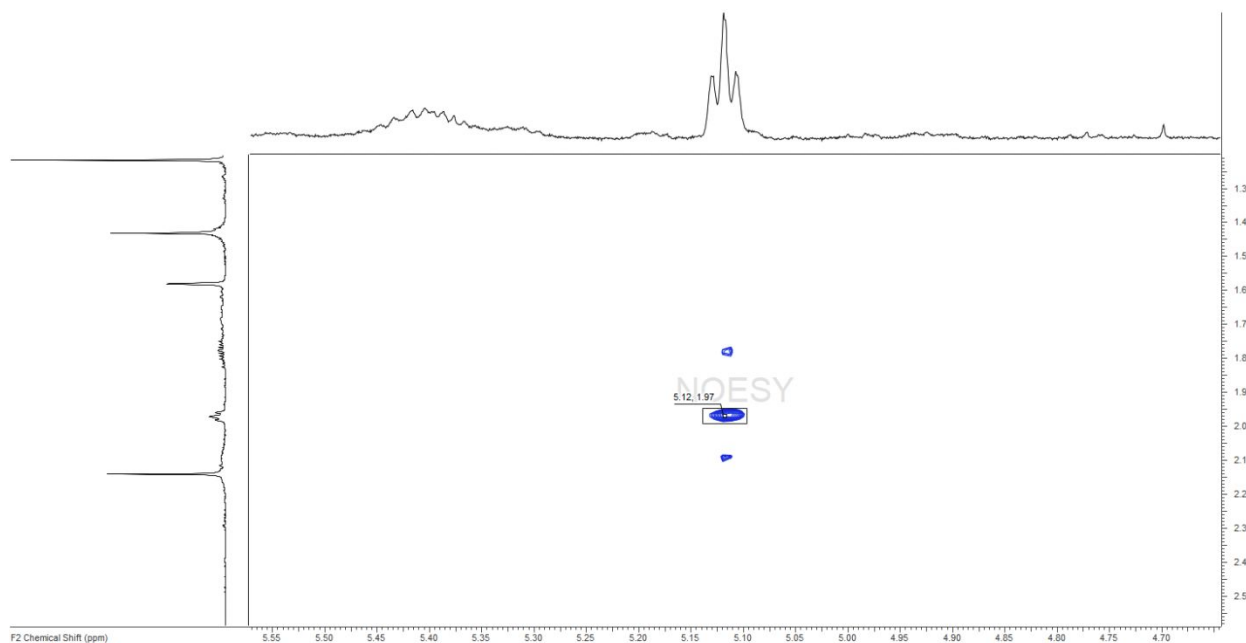

Figure S28: Tuaimenal D (**3**) zoomed NOESY NMR spectrum (500 MHz, CDCl<sub>3</sub>).

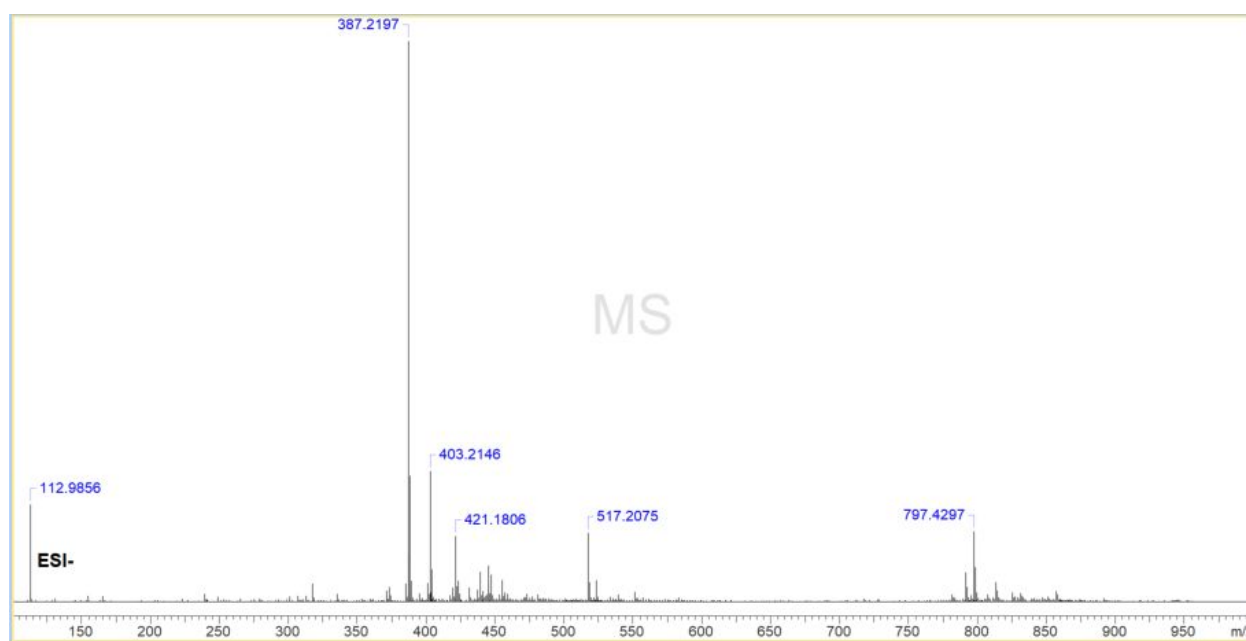

Figure S29: Tuaimenal D (**3**) HRESIMS (neg).

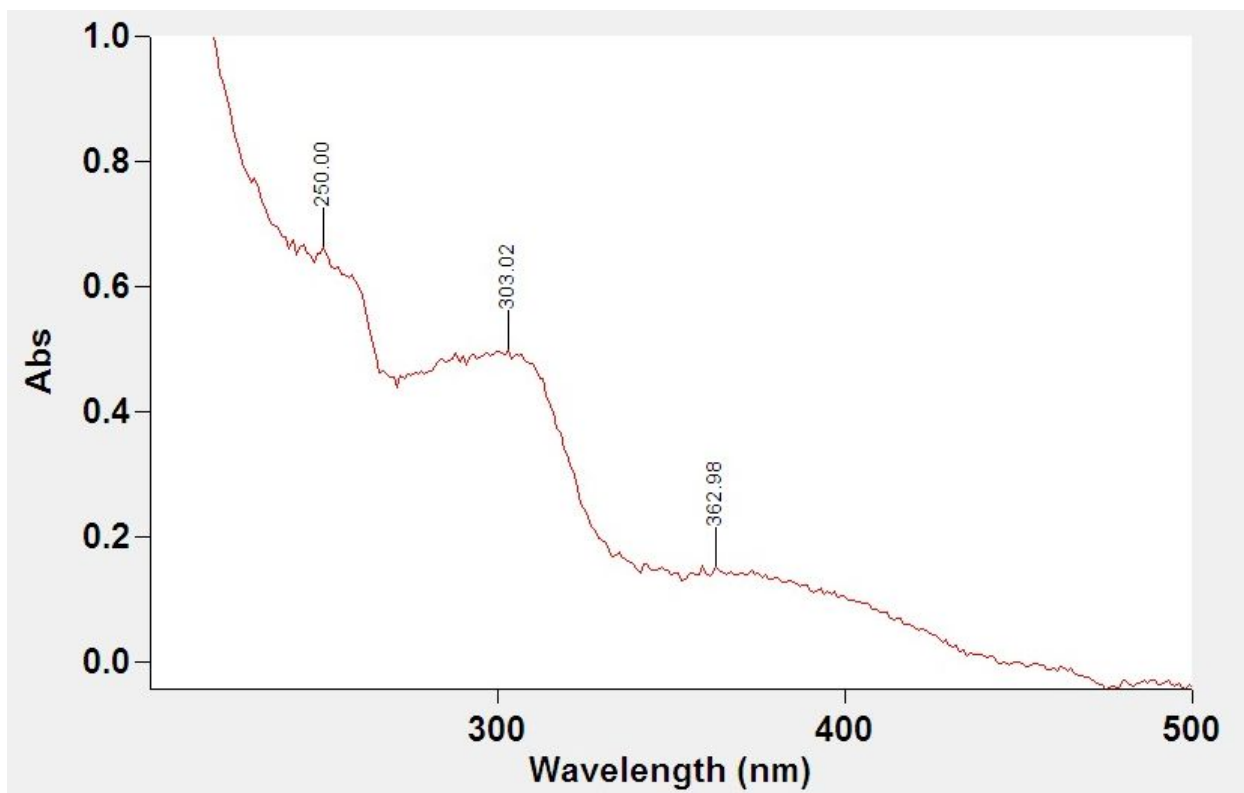

Figure S30: Tuaimenal D (**3**) UV  $\lambda_{max}$  ( $C_2H_3N$ ).

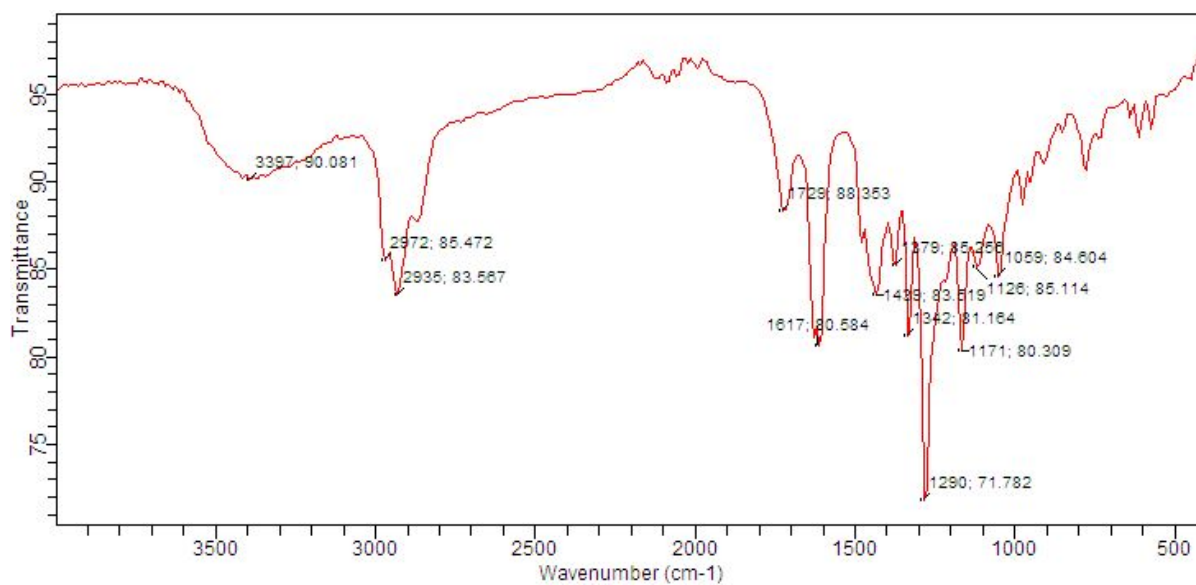

Figure S31: Tuaimenal D (**3**) IR spectrum (thin film).

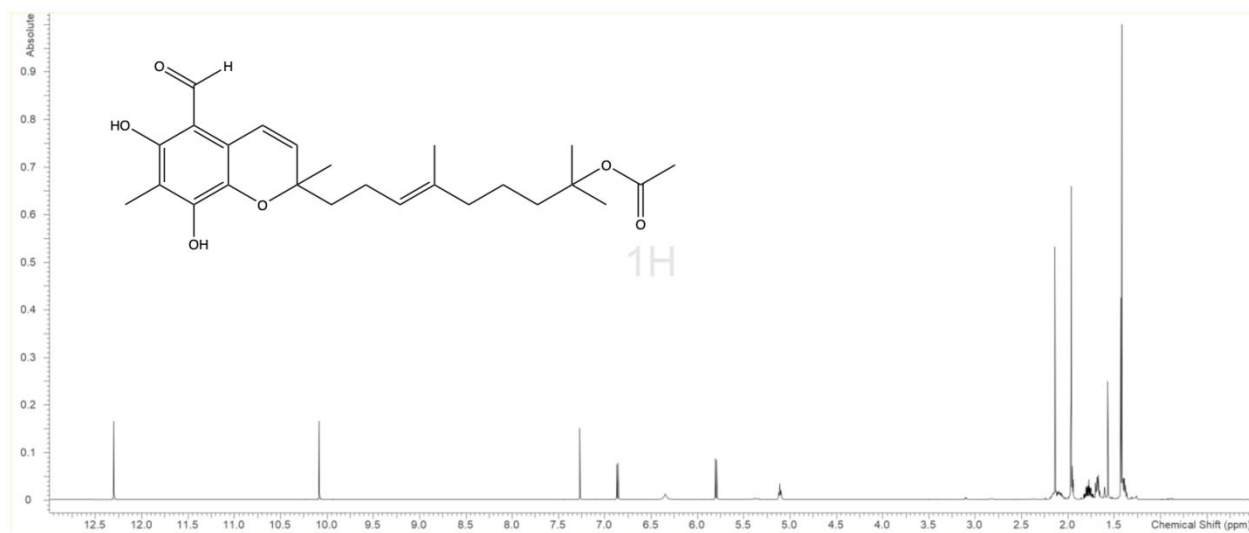

Figure S32: Tuaimenal E (**4**) <sup>1</sup>H NMR spectrum (600 MHz, CDCl<sub>3</sub>).

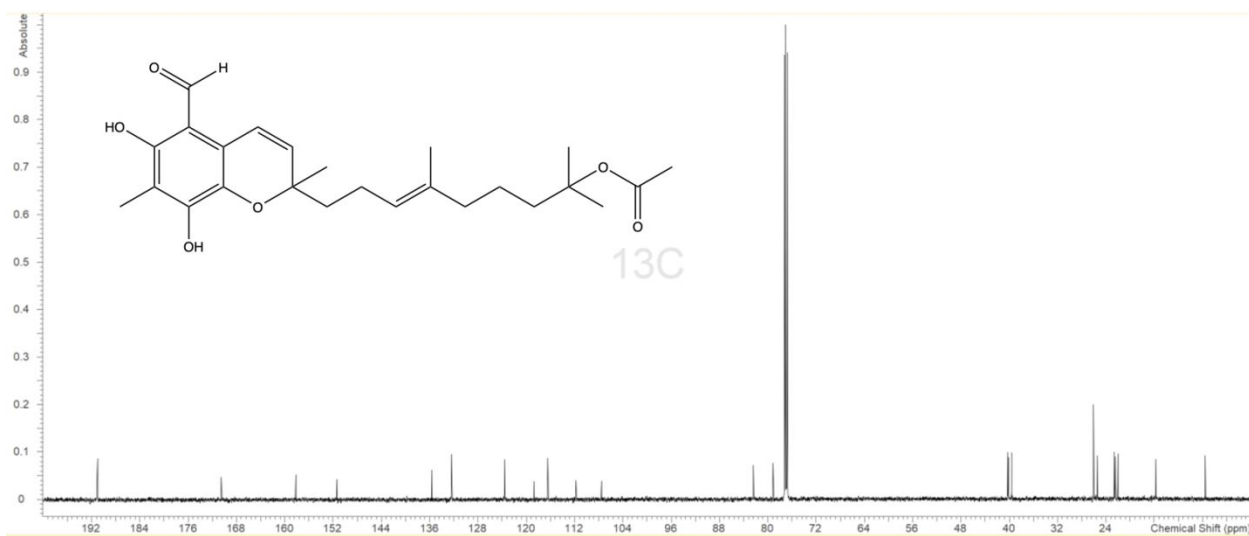

Figure S33: Tuaimenal E (**4**) <sup>13</sup>C NMR spectrum (150 MHz, CDCl<sub>3</sub>).

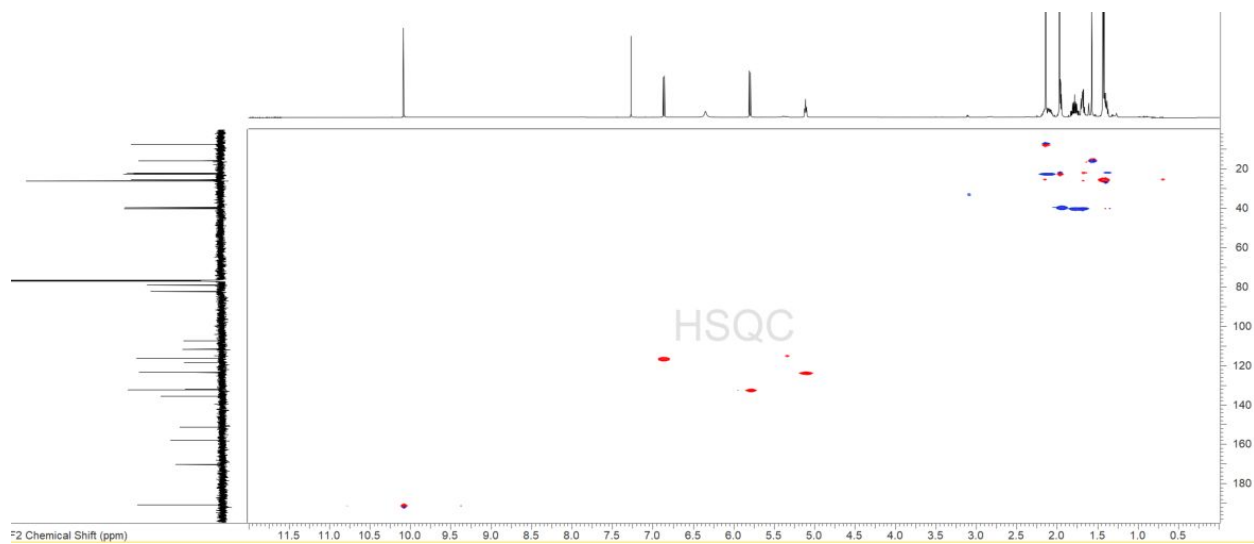

Figure S34: Tuaimenal E (**4**) HSCQ NMR spectrum (500 MHz, CDCl<sub>3</sub>).

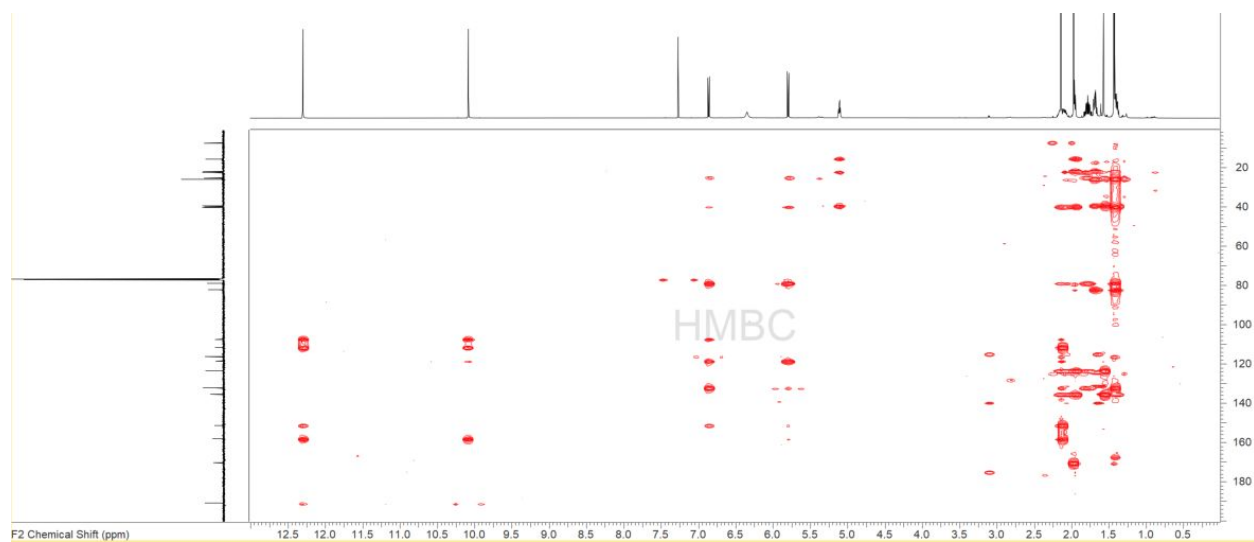

Figure S35: Tuaimenal E (**4**) HMBC NMR spectrum (500 MHz, CDCl<sub>3</sub>).

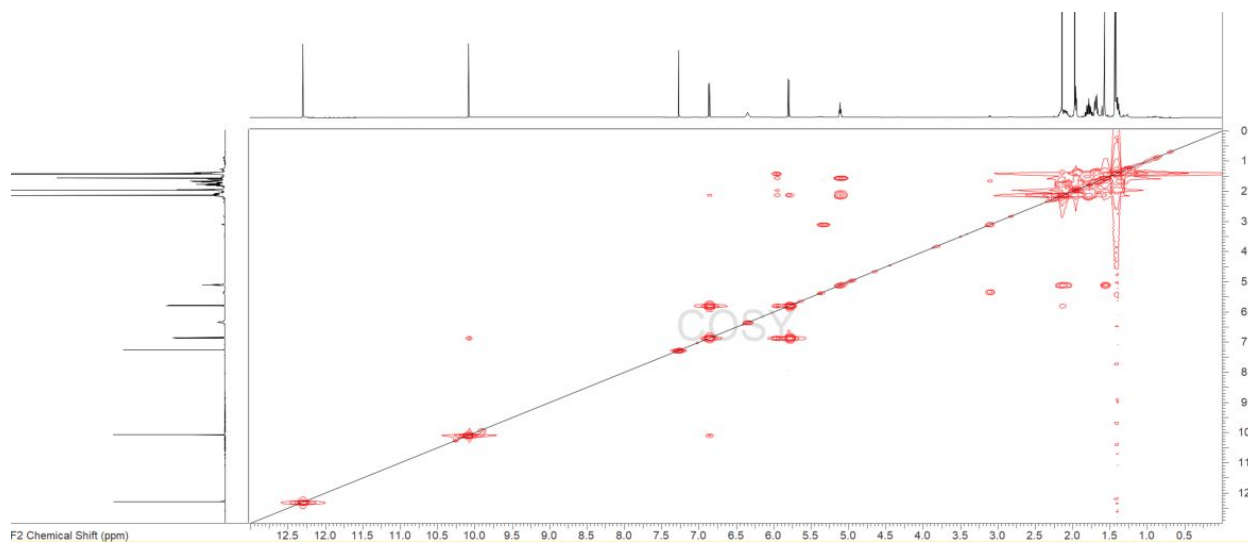

Figure S36: Tuaimenal E (**4**) COSY NMR spectrum (500 MHz, CDCl<sub>3</sub>).

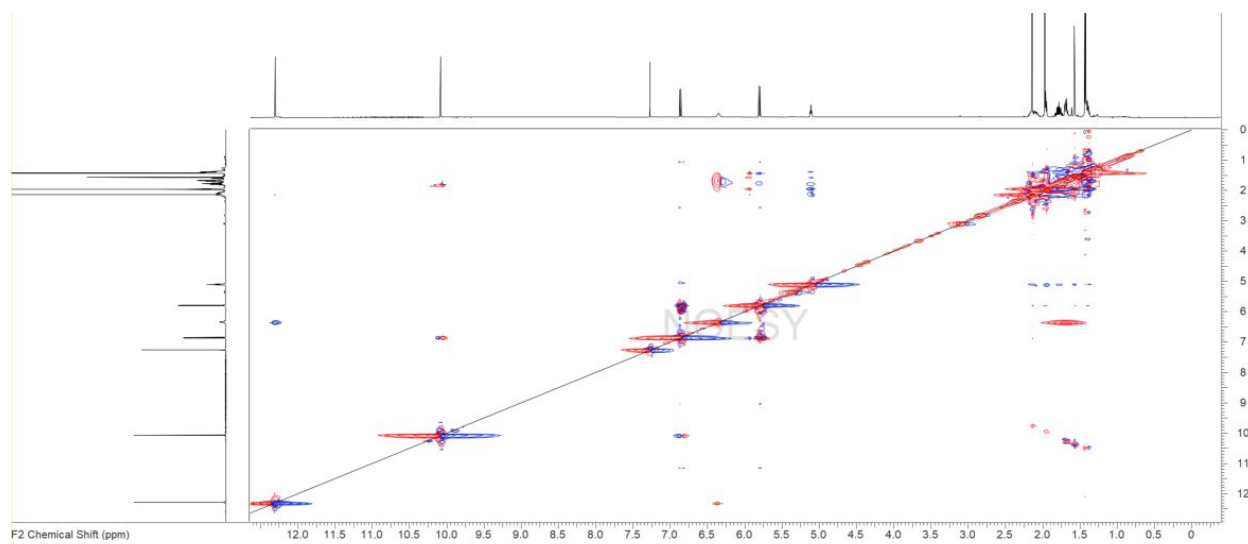

Figure S37: Tuaimenal E (**4**) NOESY NMR spectrum (500 MHz, CDCl<sub>3</sub>).

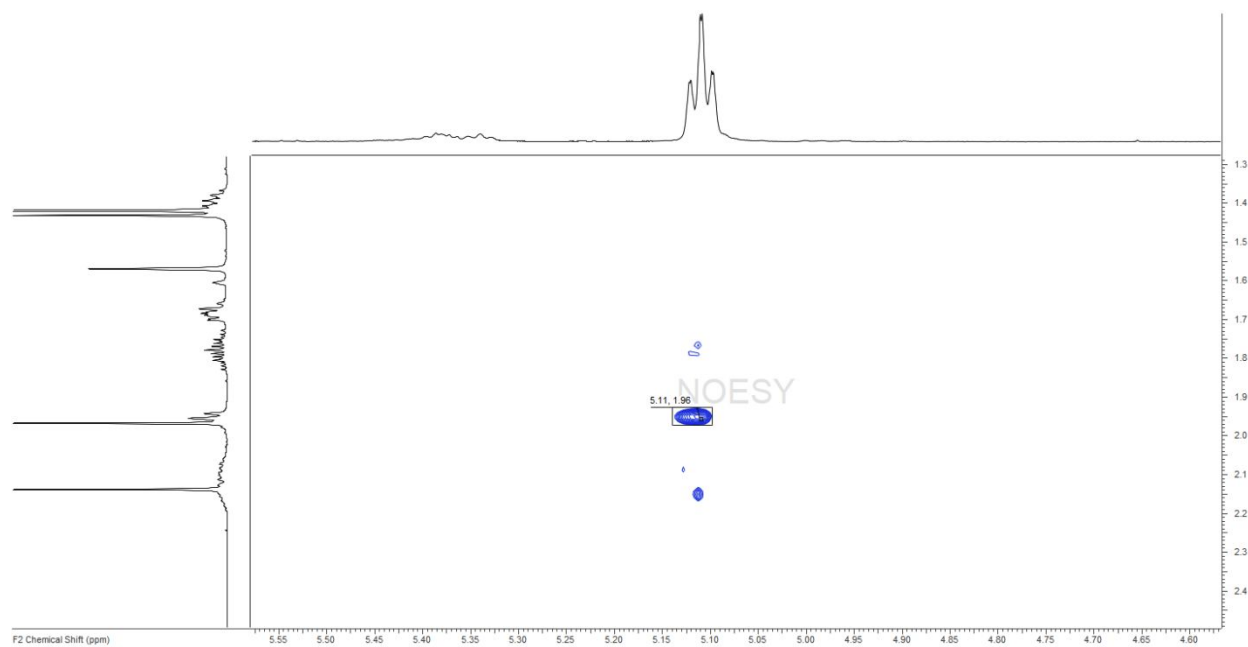

Figure S38: Tuaimenal E (**4**) zoomed NOESY NMR spectrum (500 MHz,  $\text{CDCl}_3$ ).

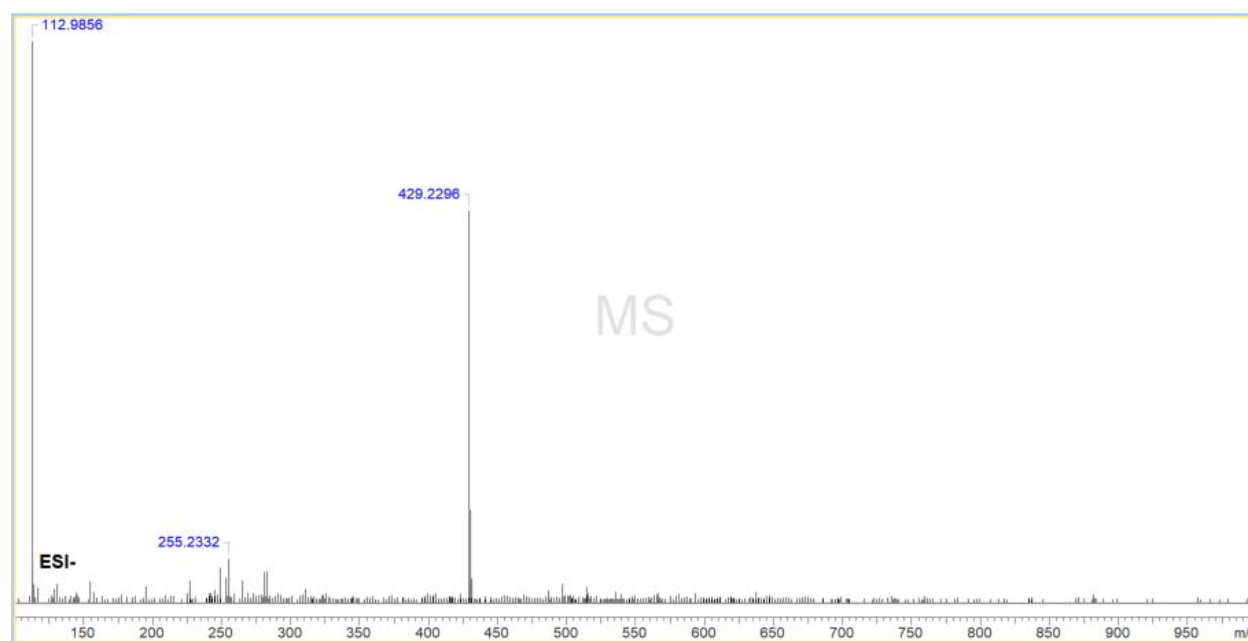

Figure S39: Tuaimenal E (**4**) HRESIMS (neg).

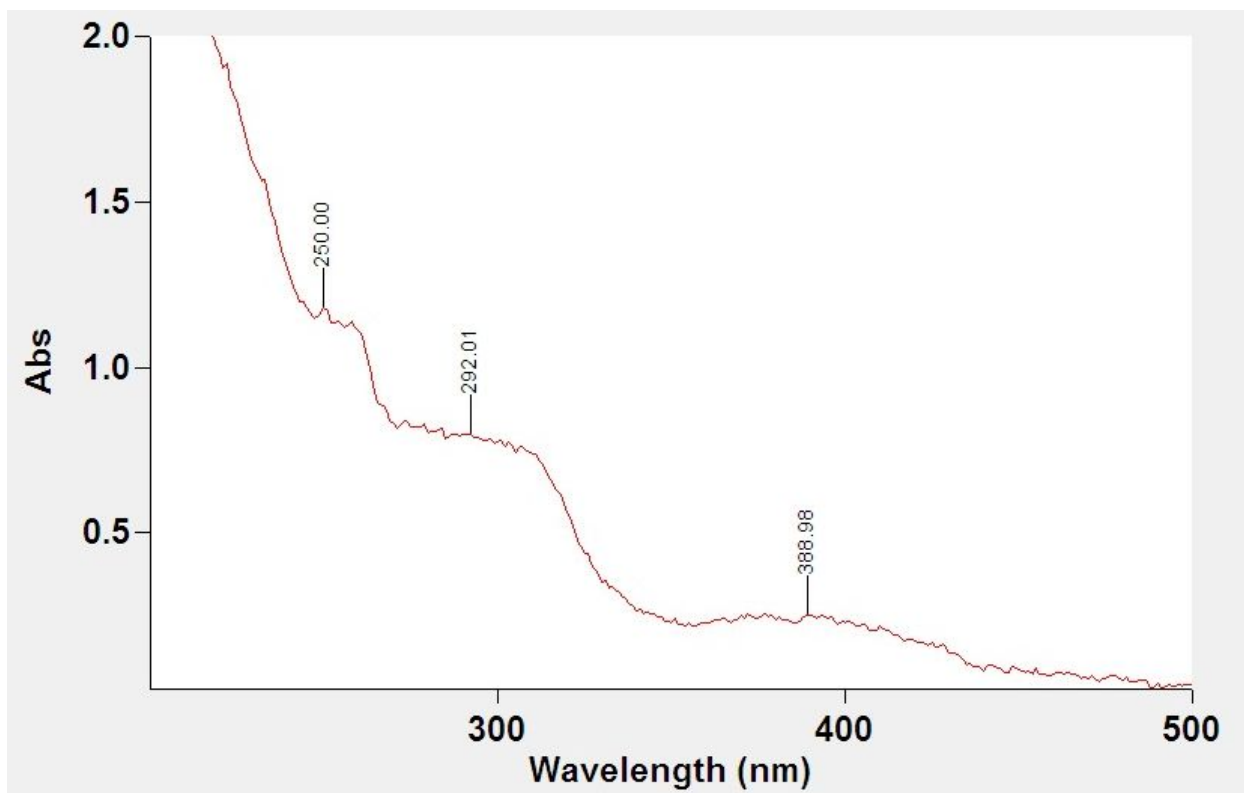

Figure S40: Tuaimenal E (**4**) UV  $\lambda_{\max}$  ( $C_2H_3N$ ).

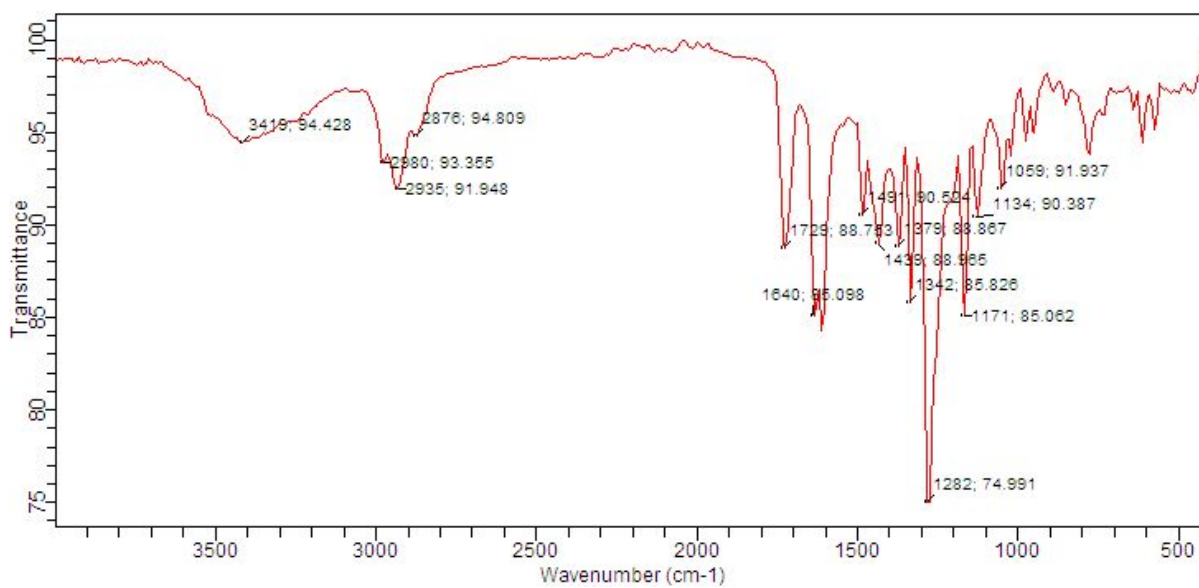

Figure S41: Tuaimenal E (**4**) IR spectrum (thin film).



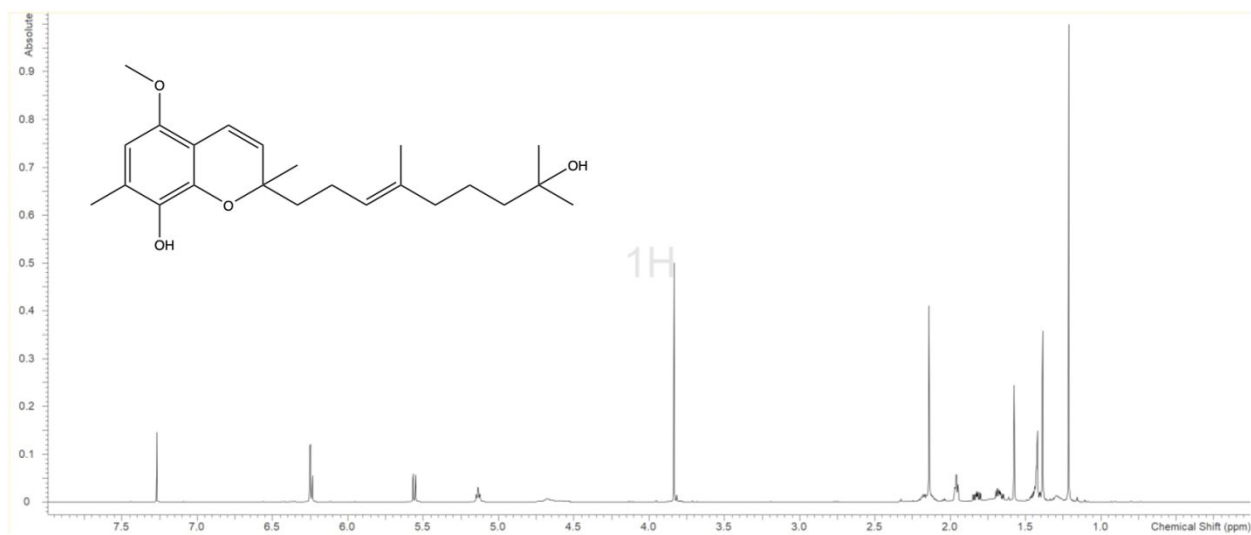

Figure S42: Tuaimenal F (**5**) <sup>1</sup>H NMR spectrum (600 MHz, CDCl<sub>3</sub>).

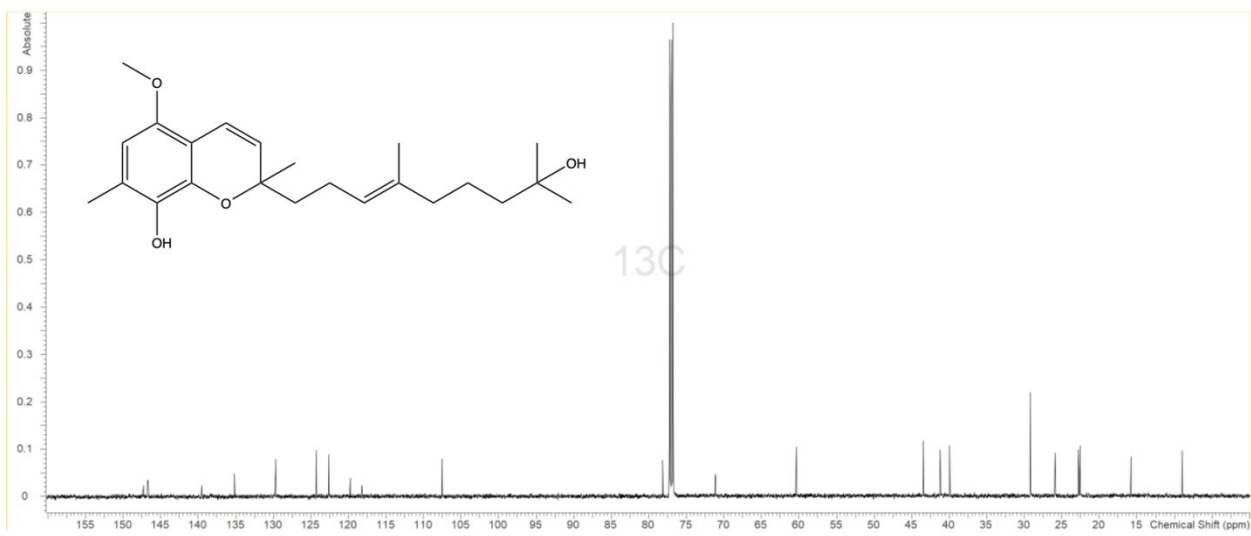

Figure S43: Tuaimenal F (**5**) <sup>13</sup>C NMR spectrum (150 MHz, CDCl<sub>3</sub>).

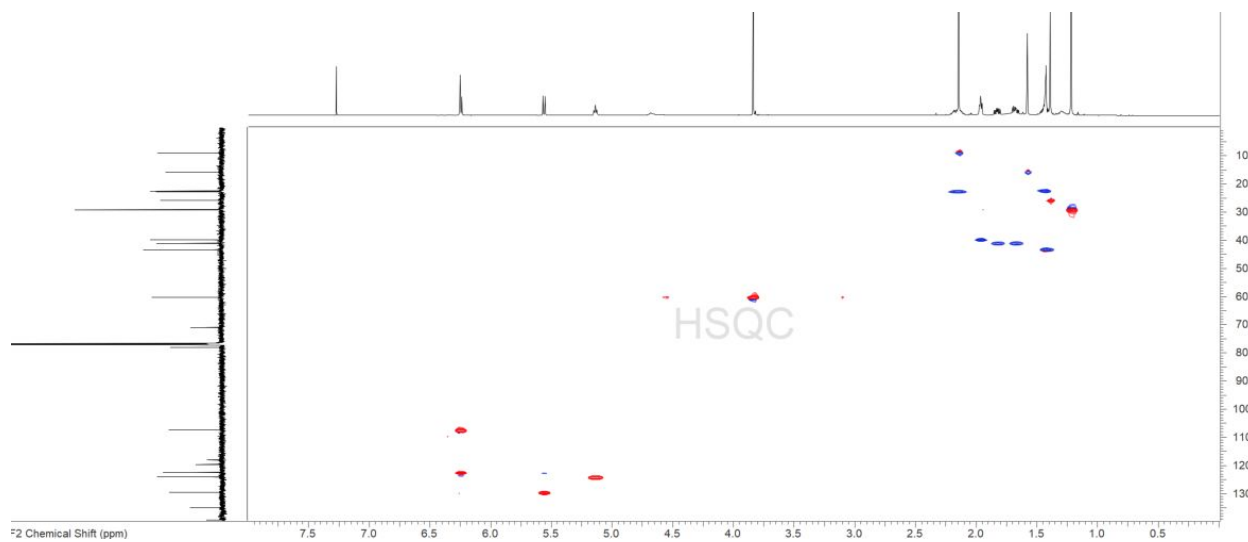

Figure S44: Tuaimenal F (**5**) HSCQ NMR spectrum (500 MHz, CDCl<sub>3</sub>).

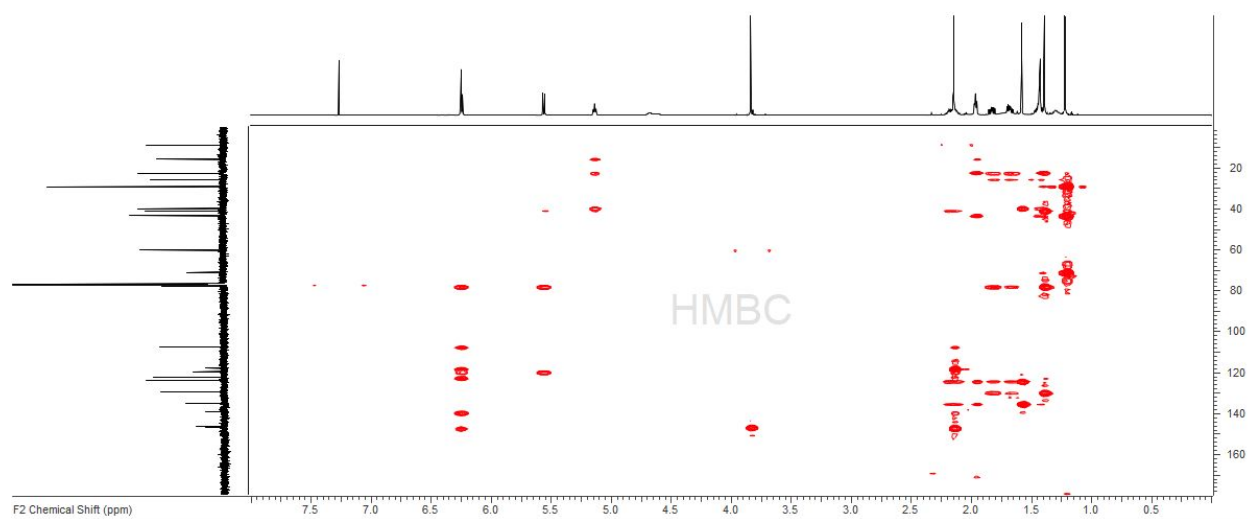

Figure S45: Tuaimenal F (**5**) HMBC NMR spectrum (500 MHz, CDCl<sub>3</sub>).

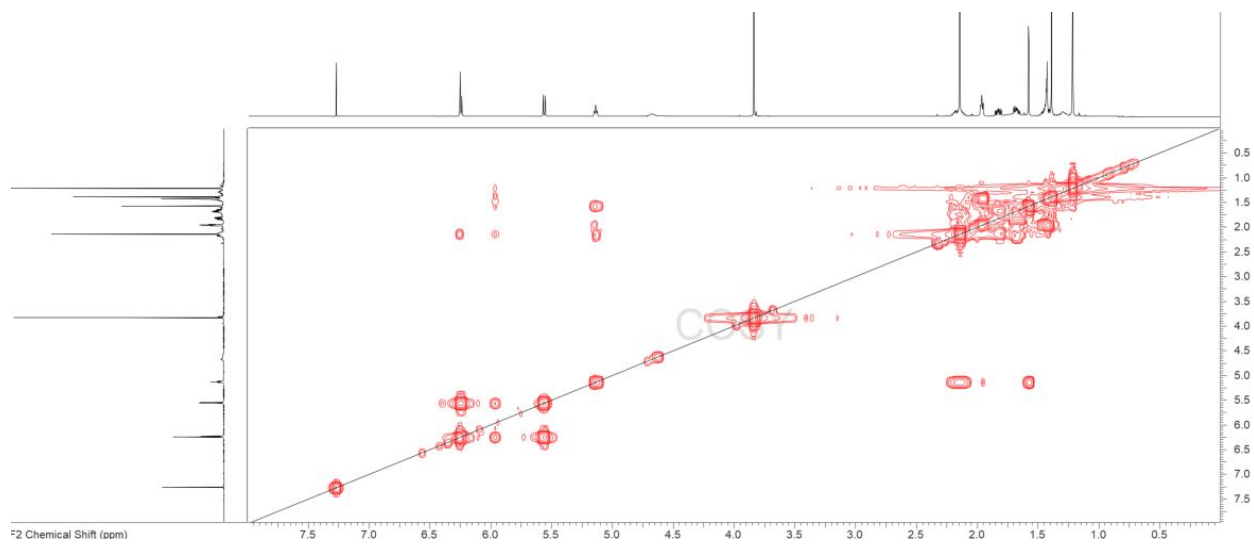

Figure S46: Tuaimenal F (**5**) COSY NMR spectrum (500 MHz, CDCl<sub>3</sub>).

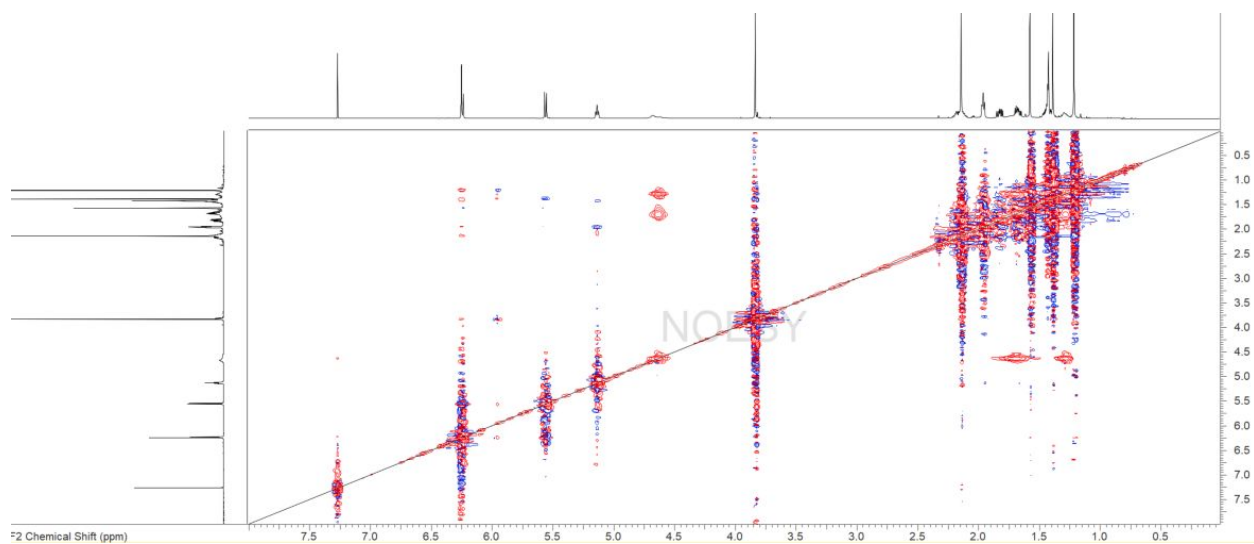

Figure S47: Tuaimenal F (**5**) NOESY NMR spectrum (500 MHz, CDCl<sub>3</sub>).

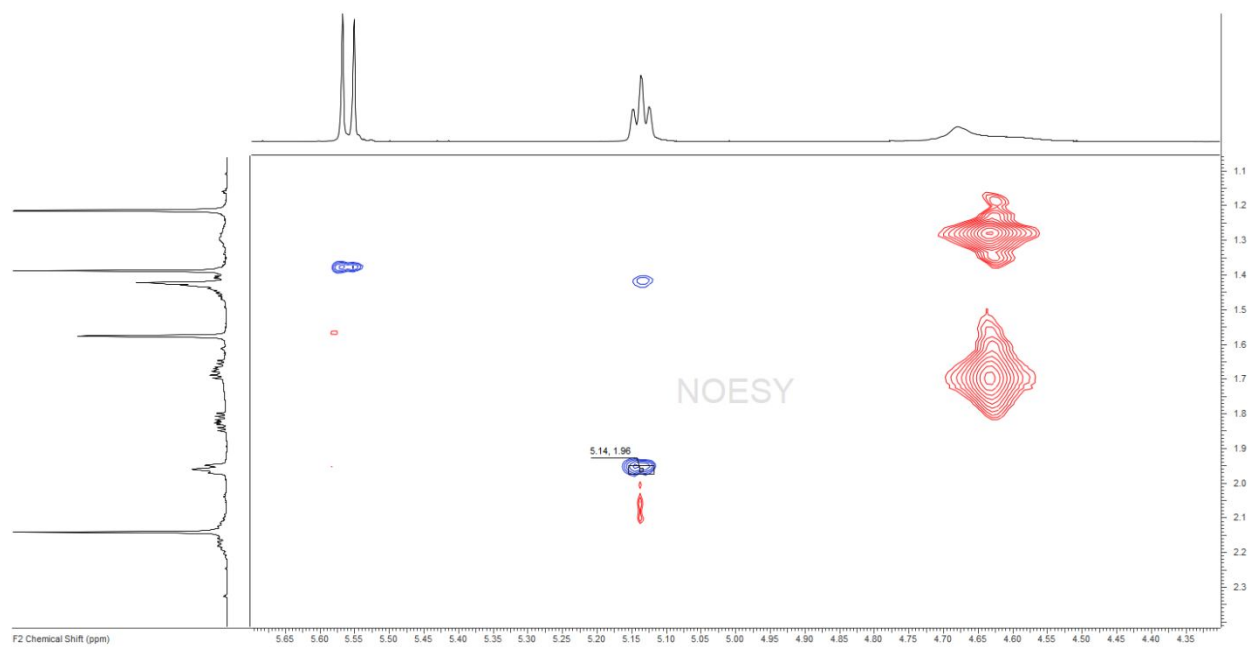

Figure S48: Tuaimenal F (**5**) zoomed NOESY NMR spectrum (500 MHz,  $\text{CDCl}_3$ ).

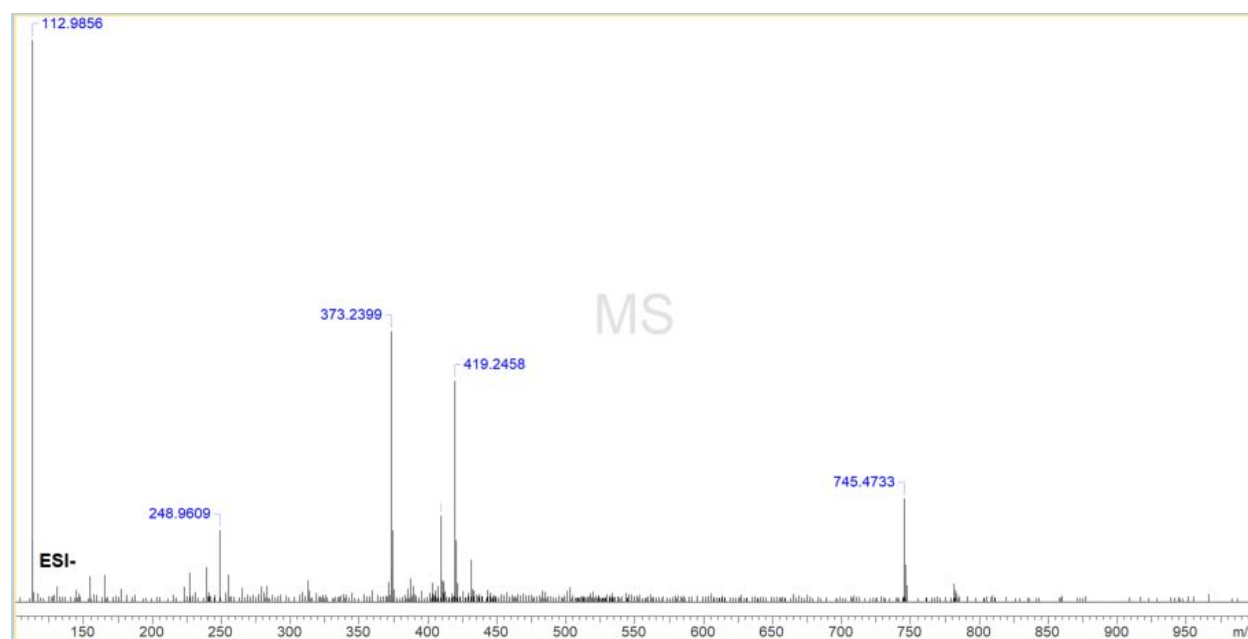

Figure S49: Tuaimenal F (**5**) HRESIMS (neg).

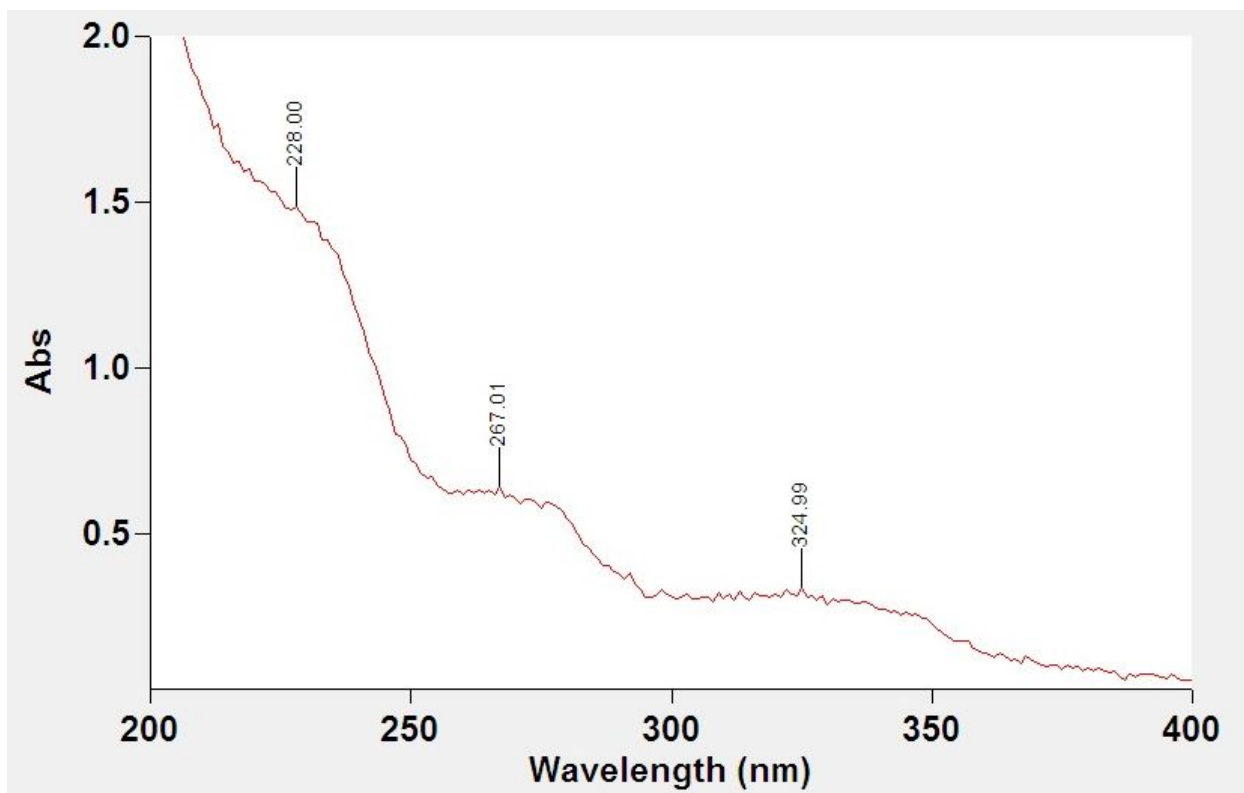

Figure S50: Tuaimenal F (**5**) UV  $\lambda_{\max}$  ( $C_2H_3N$ ).

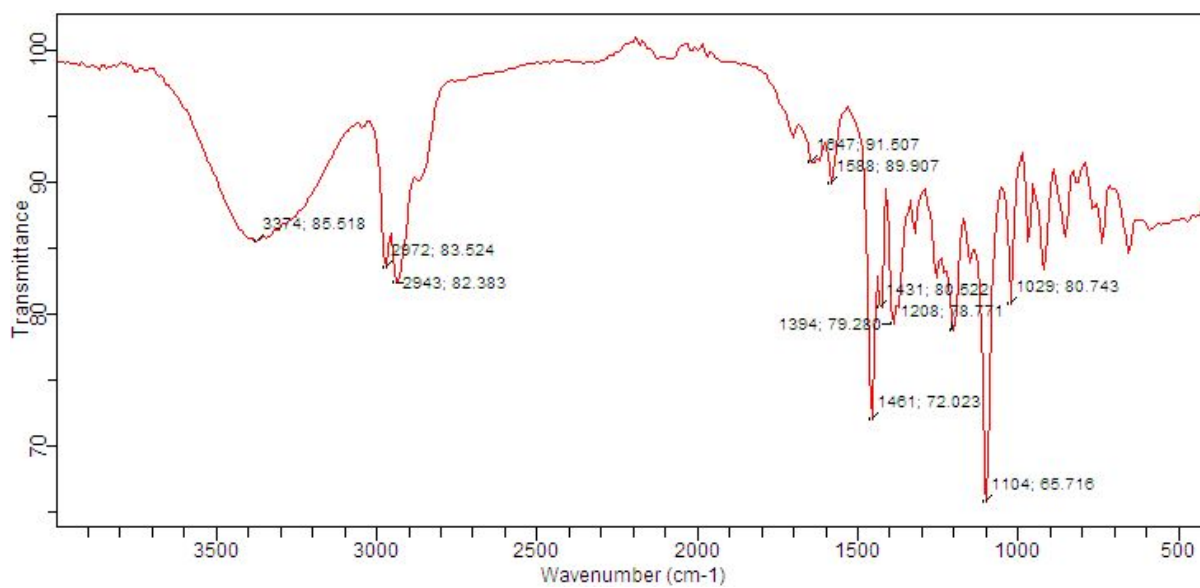

Figure S51: Tuaimenal F (**5**) IR spectrum (thin film).

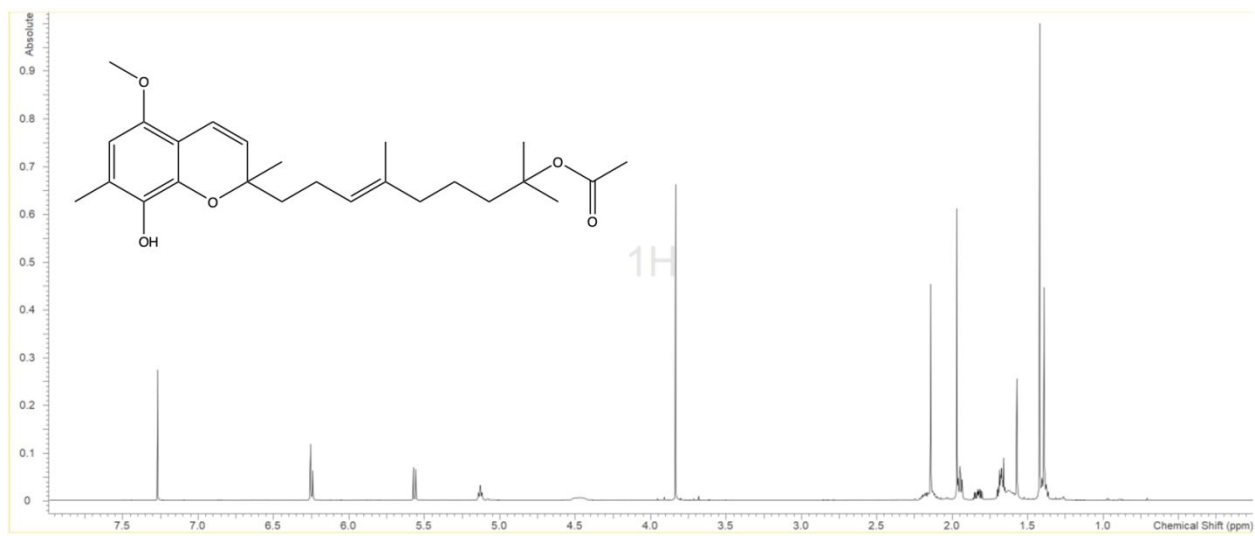

Figure S52: Tuaimenal G (**6**) <sup>1</sup>H NMR spectrum (600 MHz, CDCl<sub>3</sub>).

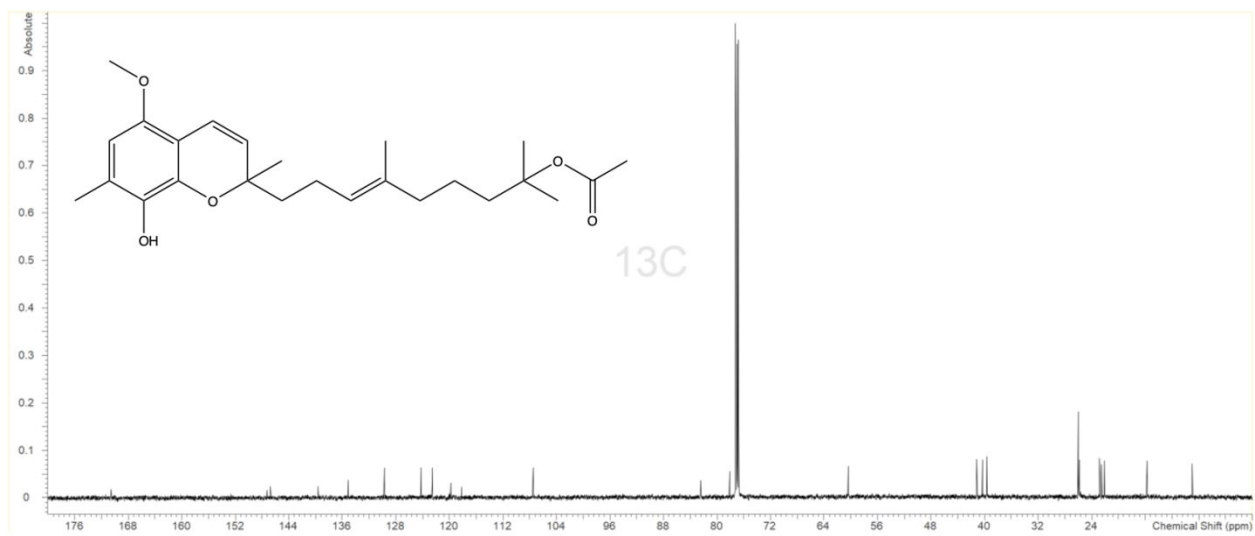

Figure S53: Tuaimenal G (**6**) <sup>13</sup>C NMR spectrum (150 MHz, CDCl<sub>3</sub>).

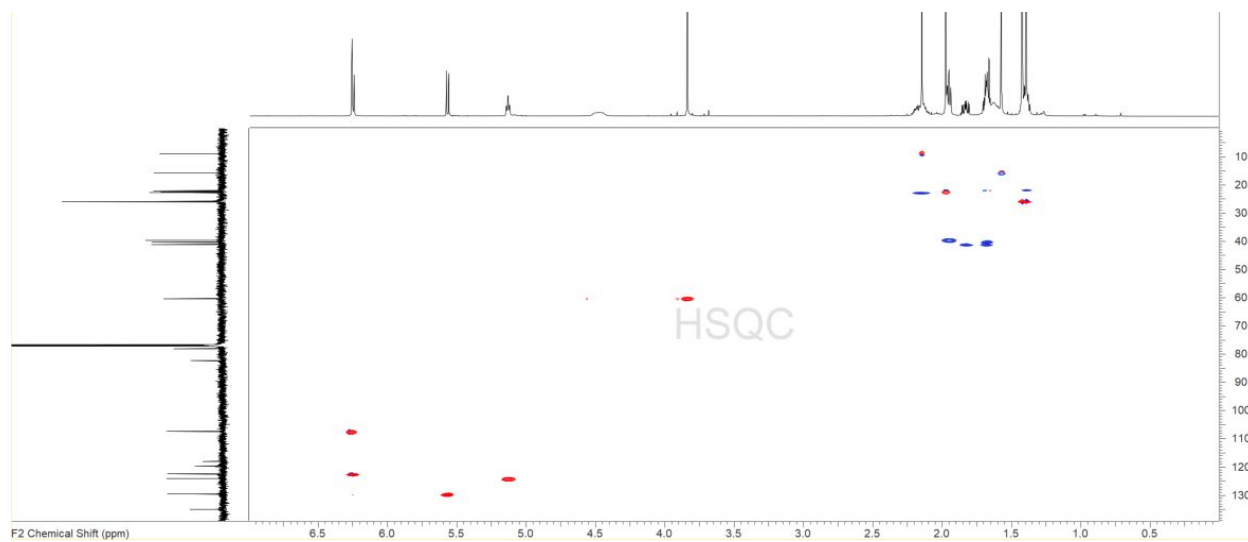

Figure S54: Tuaimenal G (**6**) HSCQ NMR spectrum (500 MHz,  $\text{CDCl}_3$ ).

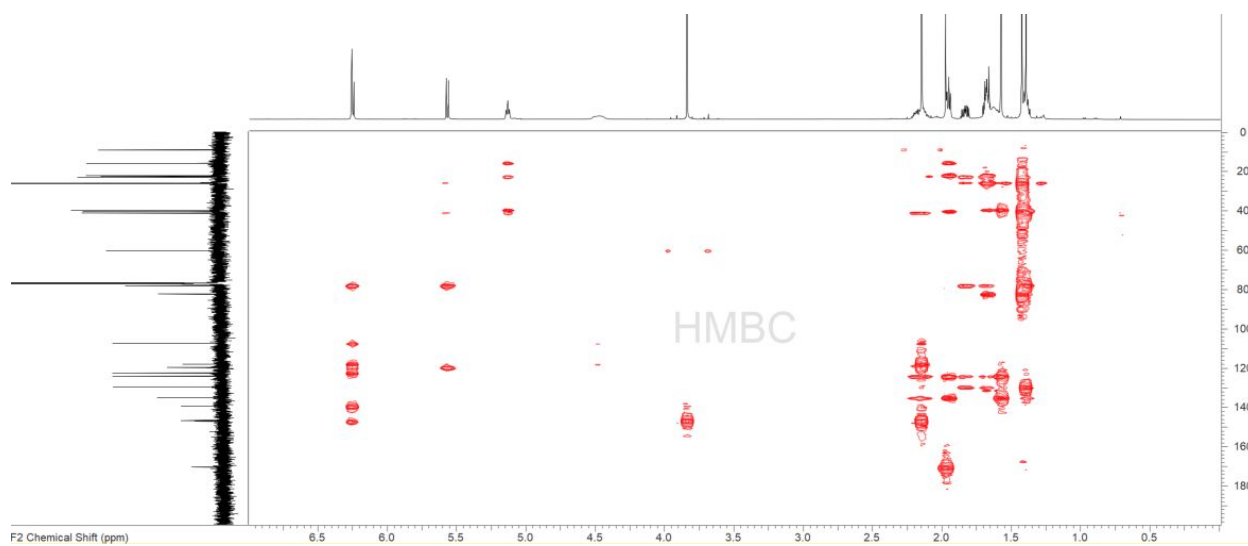

Figure S55: Tuaimenal G (**6**) HMBC NMR spectrum (500 MHz,  $\text{CDCl}_3$ ).

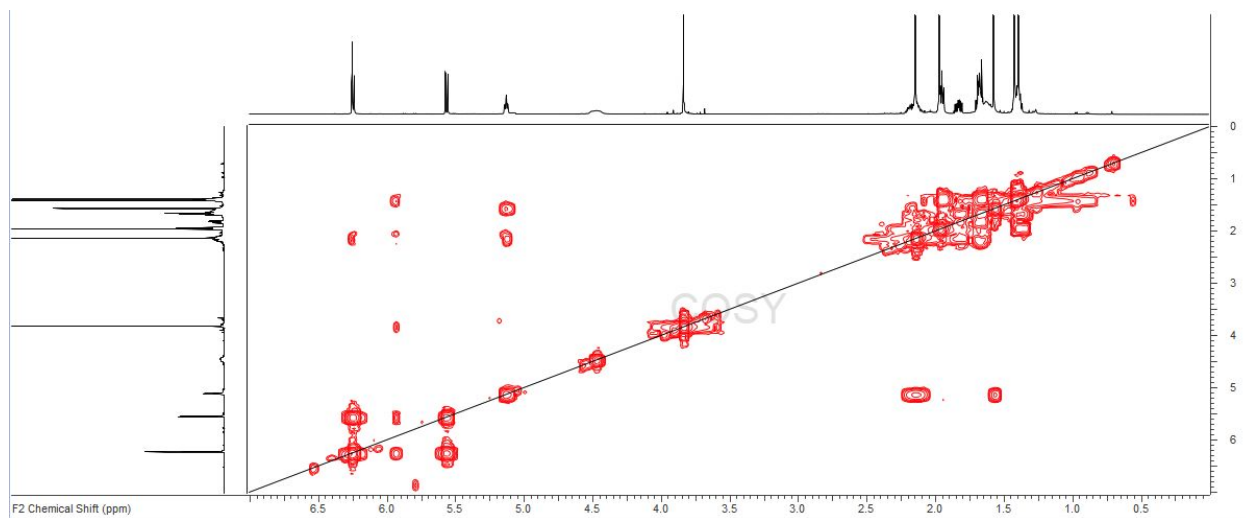

Figure S56: Tuaimenal G (**6**) COSY NMR spectrum (500 MHz, CDCl<sub>3</sub>).

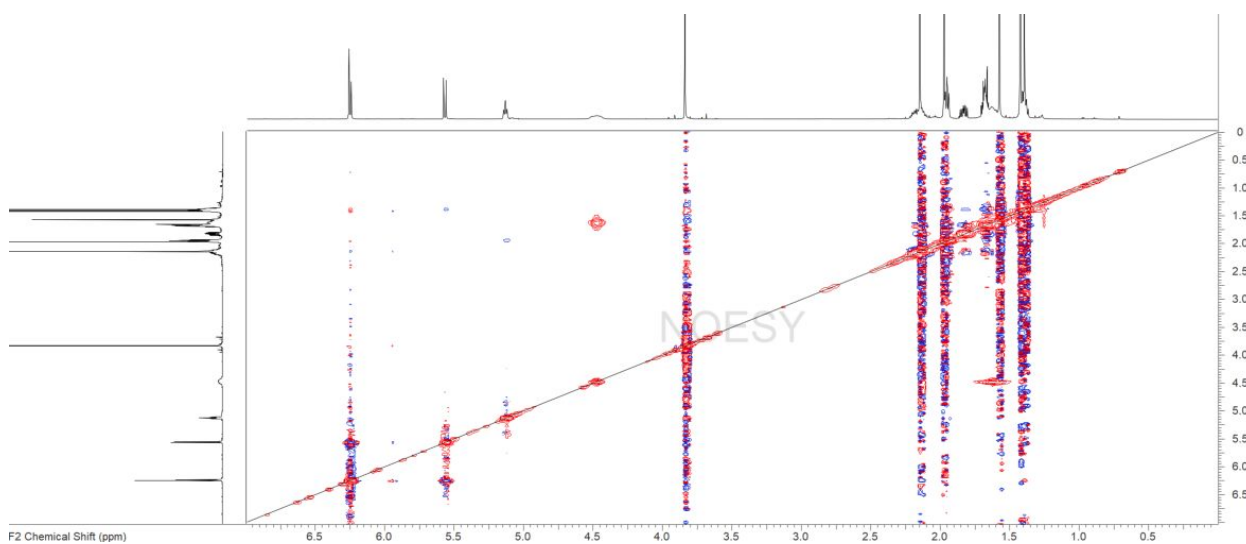

Figure S57: Tuaimenal G (**6**) NOESY NMR spectrum (500 MHz, CDCl<sub>3</sub>).



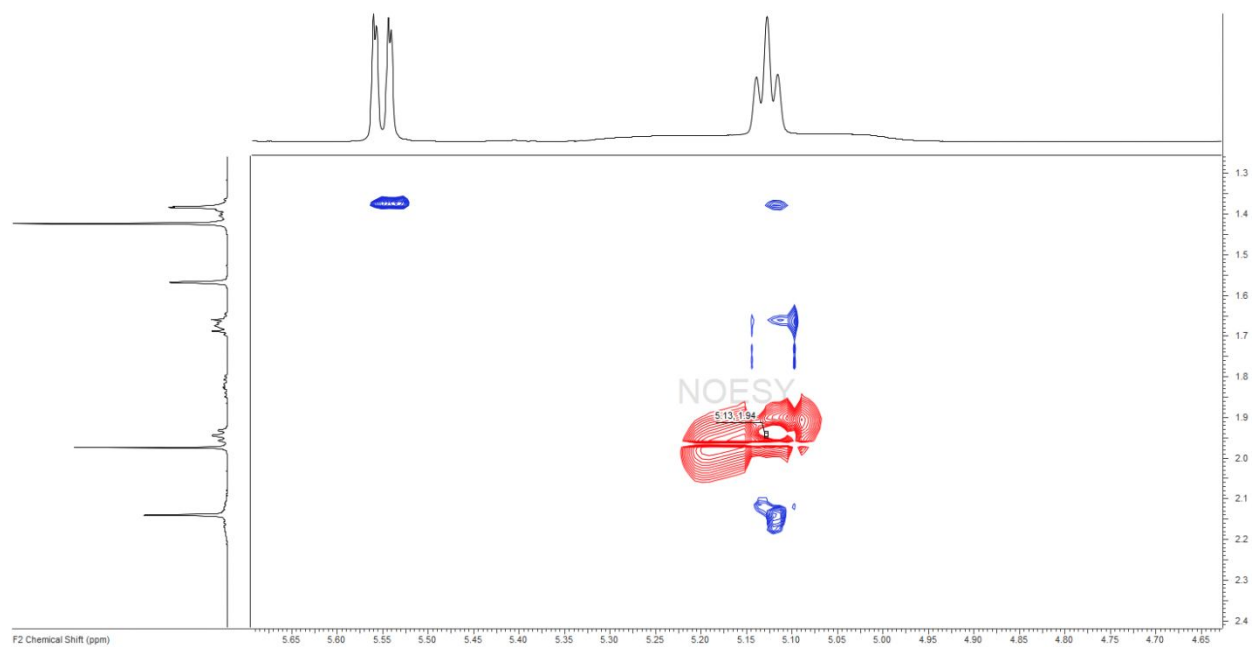

Figure S58: Tuaimenal G (**6**) zoomed NOESY NMR spectrum (500 MHz, CDCl<sub>3</sub>).

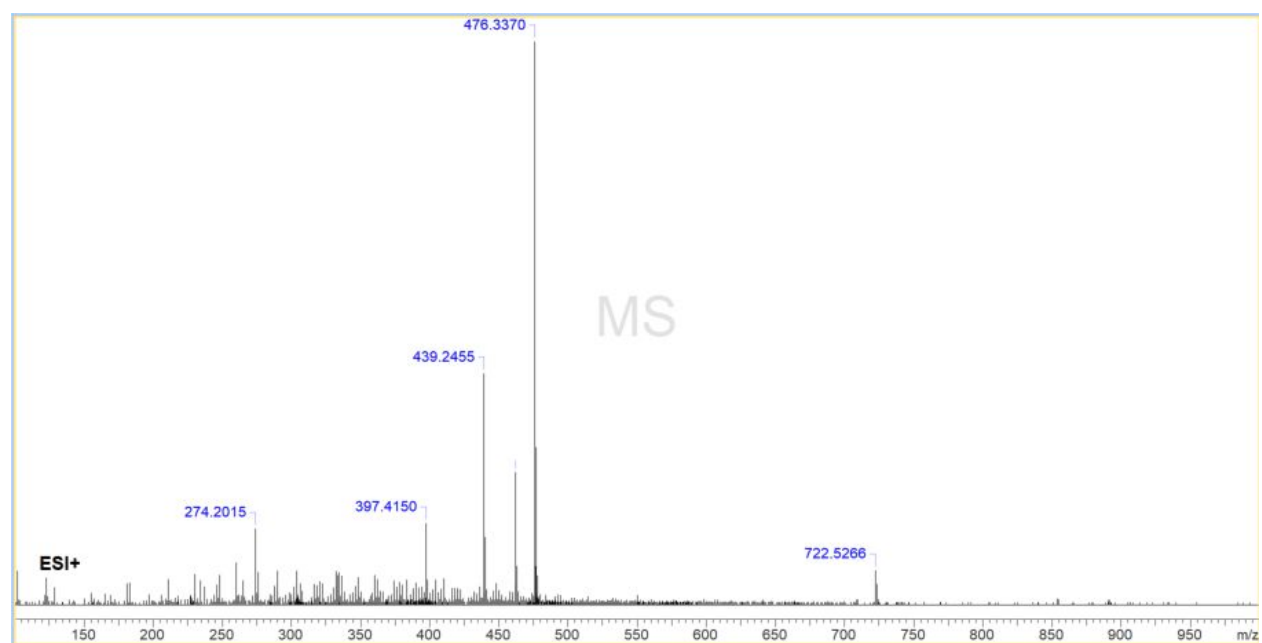

Figure S59: Tuaimenal G (**6**) HRESIMS (pos).

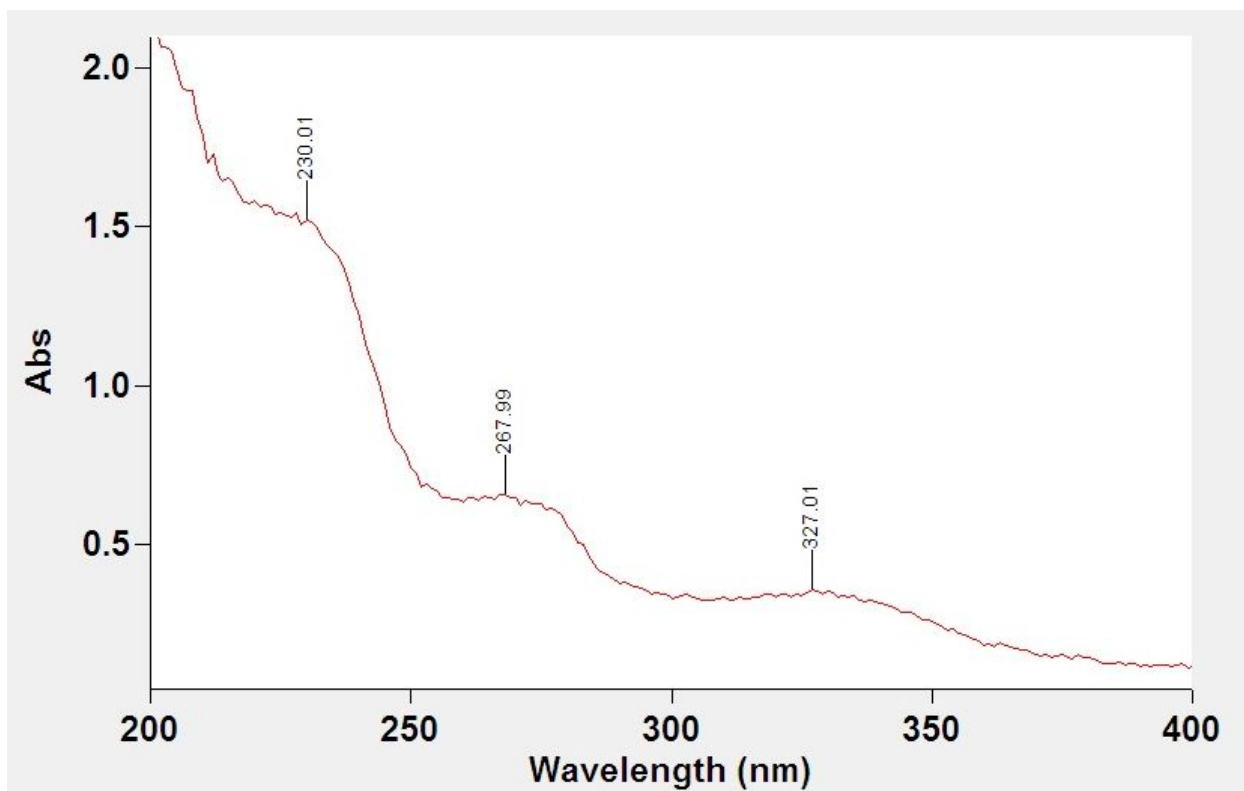

Figure S60: Tuaimenal G (6) UV  $\lambda_{\max}$  (C<sub>2</sub>H<sub>3</sub>N).

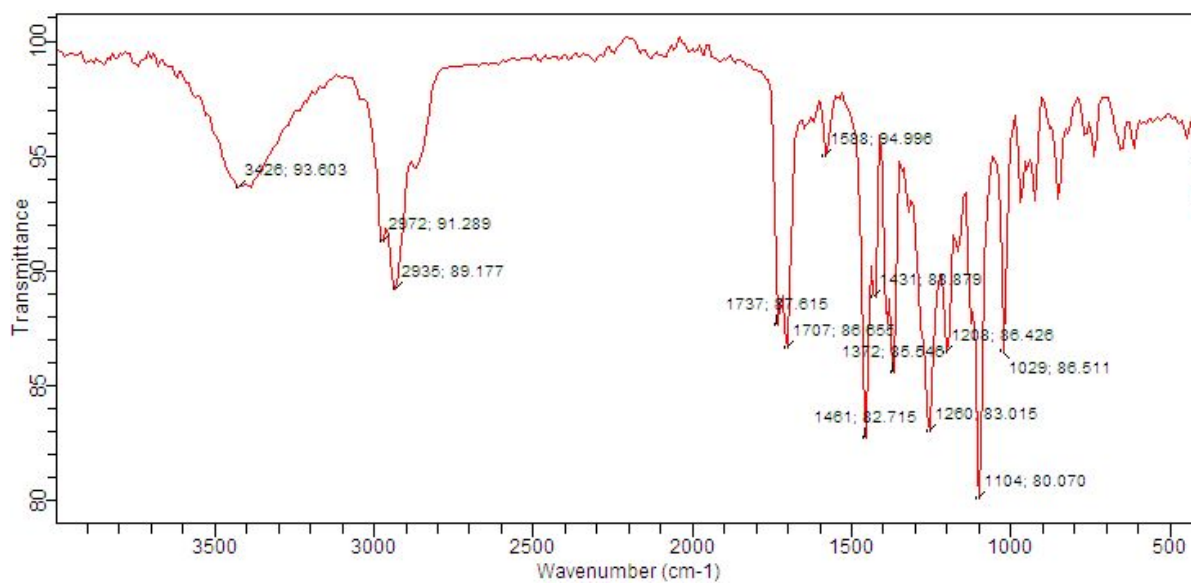

Figure S61: Tuaimenal G (6) IR spectrum (thin film).

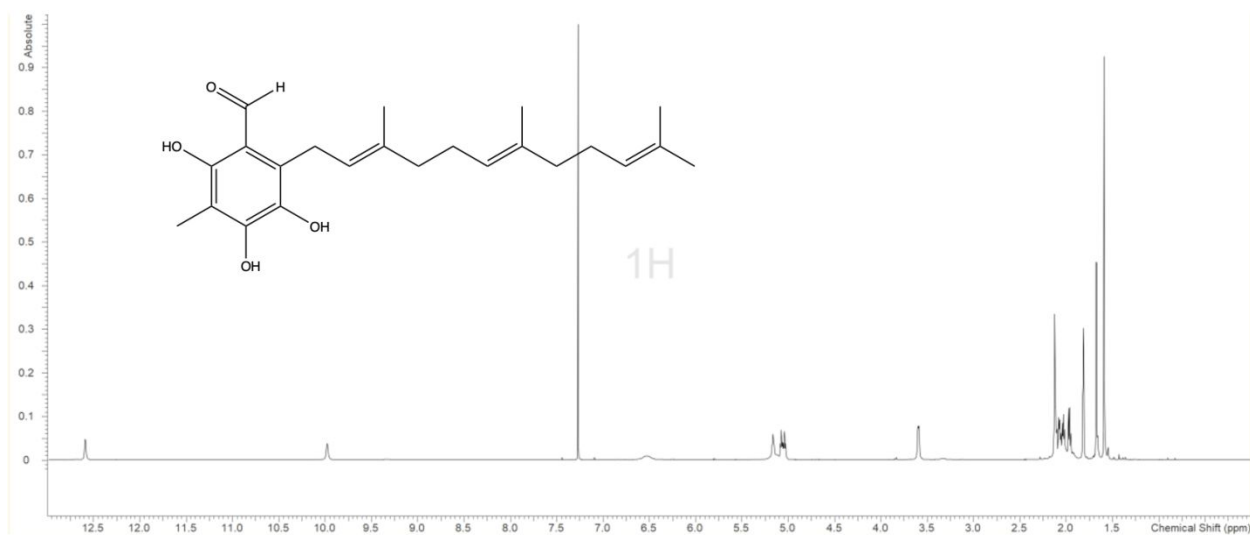

Figure S62: Tuaimenal H (7) <sup>1</sup>H NMR spectrum (600 MHz, CDCl<sub>3</sub>).

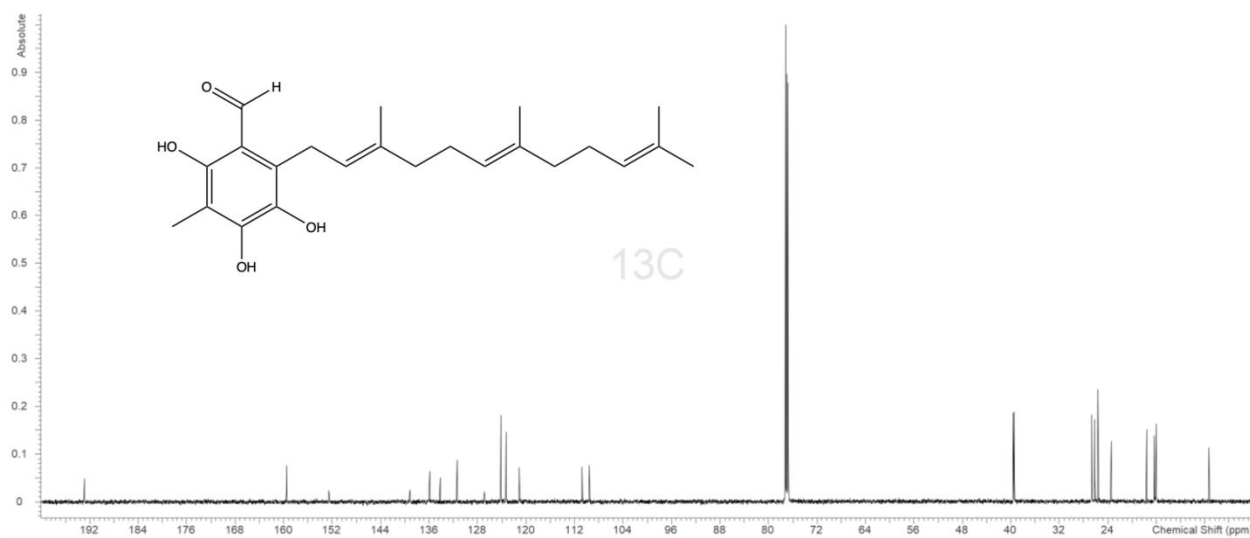

Figure S63: Tuaimenal H (7) <sup>13</sup>C NMR spectrum (150 MHz, CDCl<sub>3</sub>).

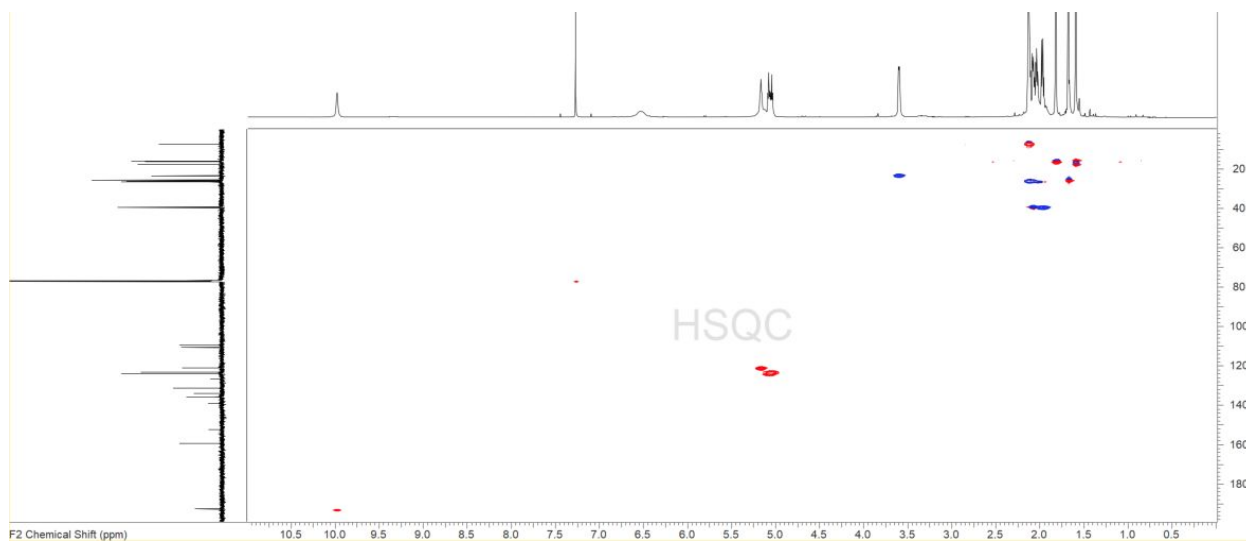

Figure S64: Tuaimenal H (7) HSCQ NMR spectrum (500 MHz, CDCl<sub>3</sub>).

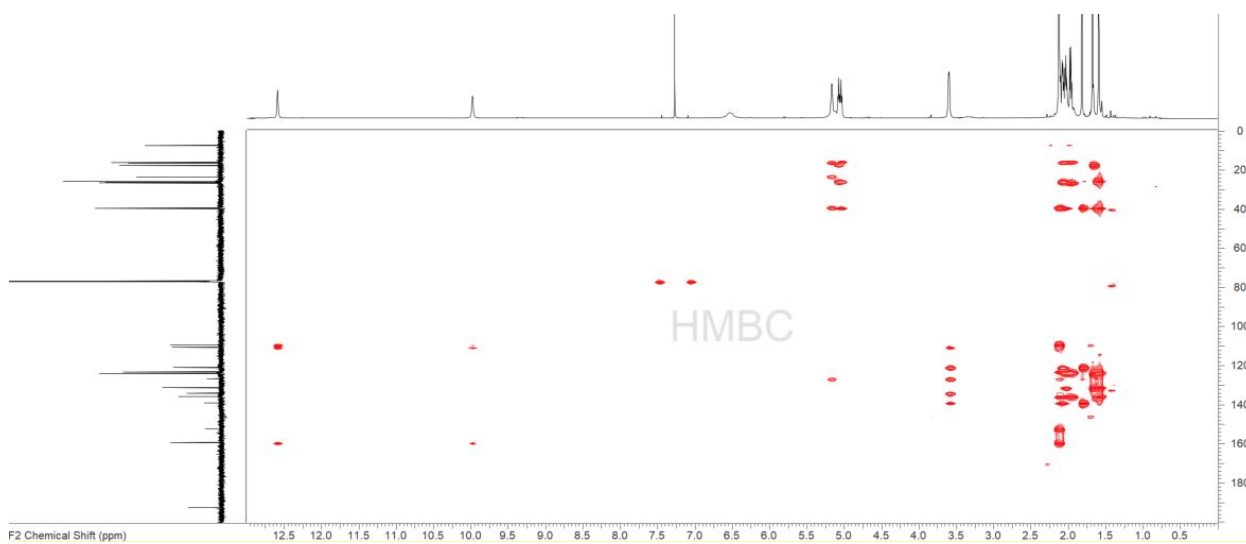

Figure S65: Tuaimenal H (7) HMBC NMR spectrum (500 MHz, CDCl<sub>3</sub>).

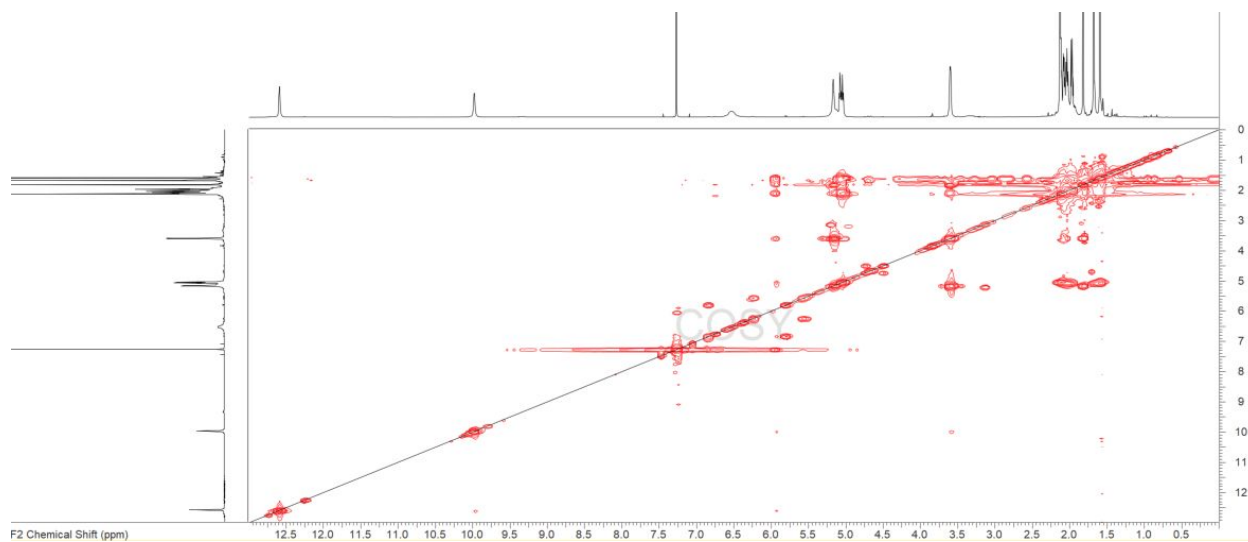

Figure S66: Tuaimenal H (7) COSY NMR spectrum (500 MHz, CDCl<sub>3</sub>).

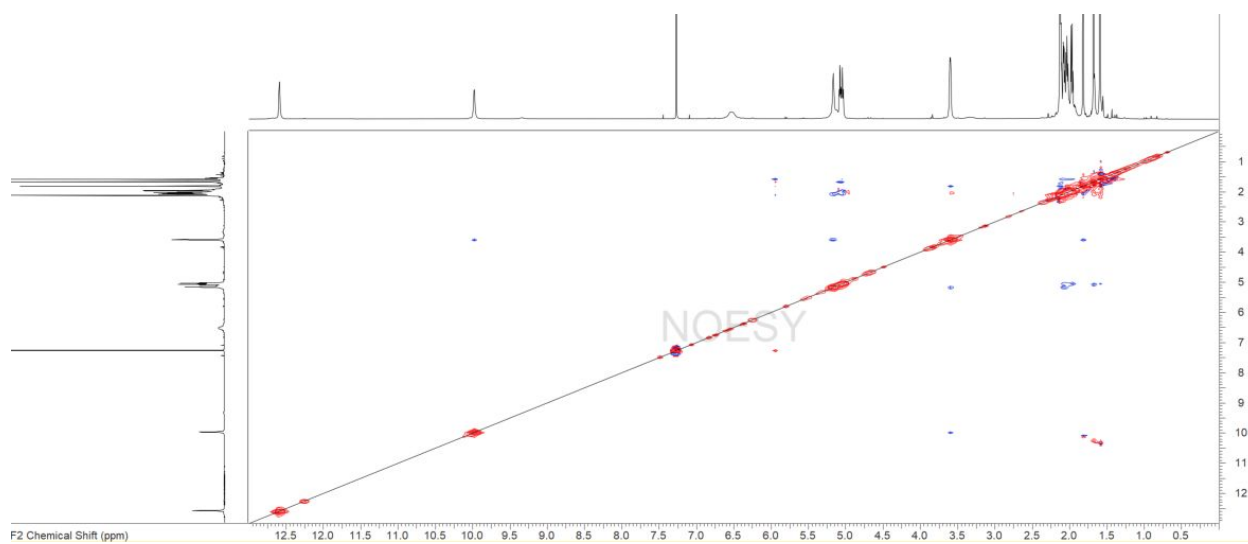

Figure S67: Tuaimenal H (7) NOESY NMR spectrum (500 MHz, CDCl<sub>3</sub>).

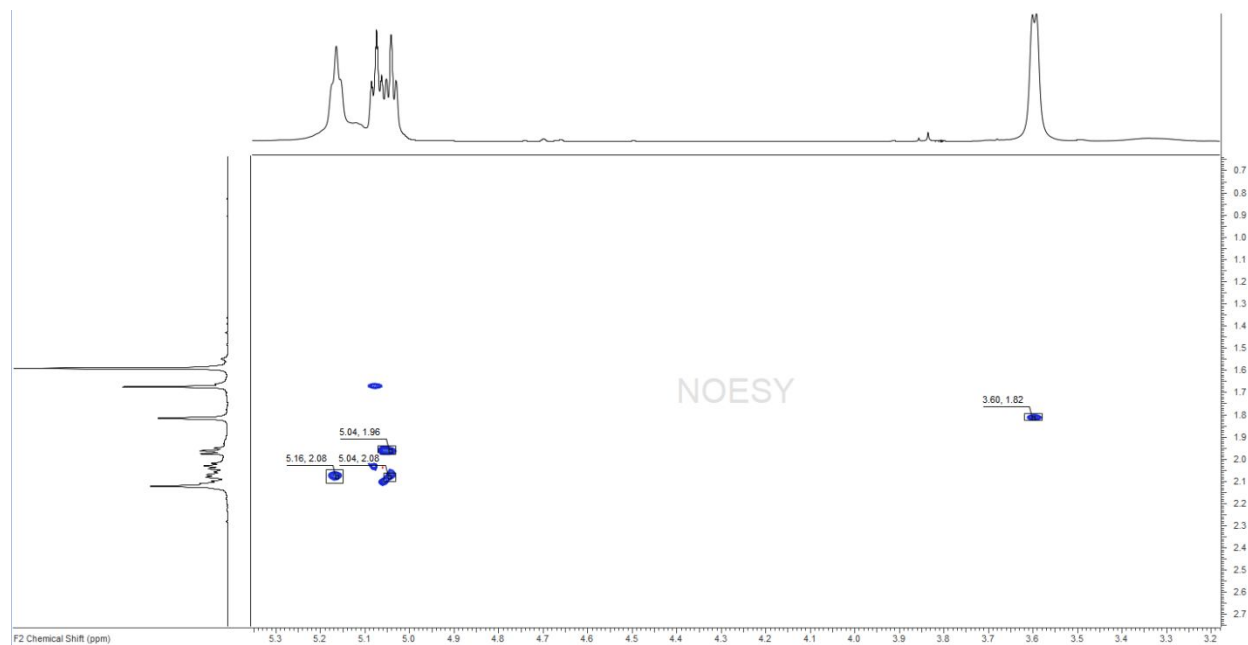

Figure S68: Tuaimenal H (**7**) zoomed NOESY NMR spectrum (500 MHz,  $\text{CDCl}_3$ ).

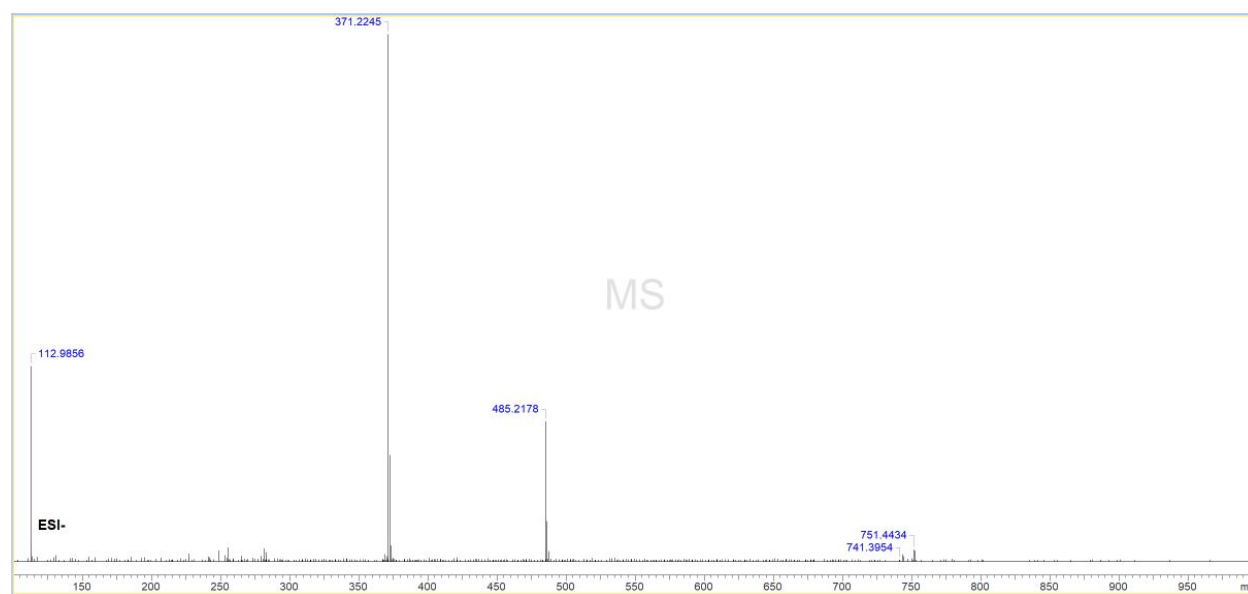

Figure S69: Tuaimenal H (**7**) HRESIMS (neg).

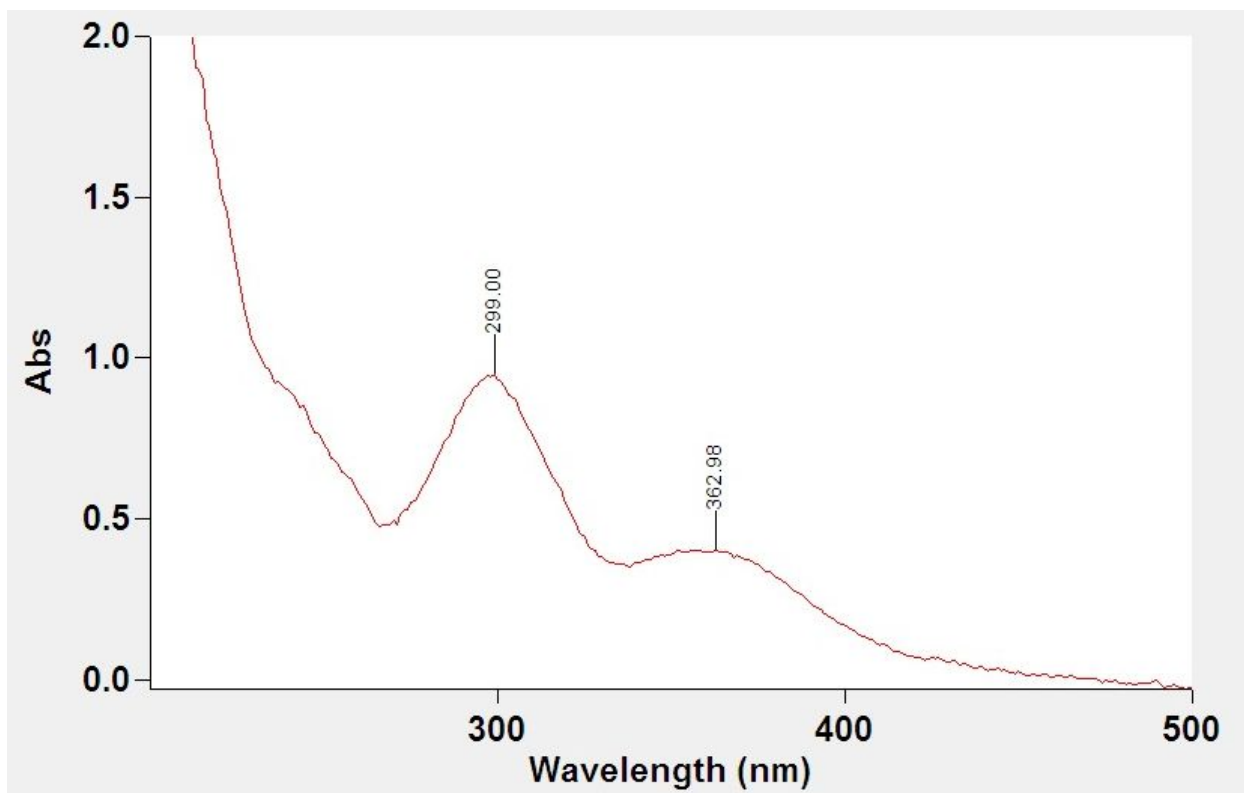

Figure S70: Tuaimenal H (7) UV  $\lambda_{max}$  ( $C_2H_3N$ ).

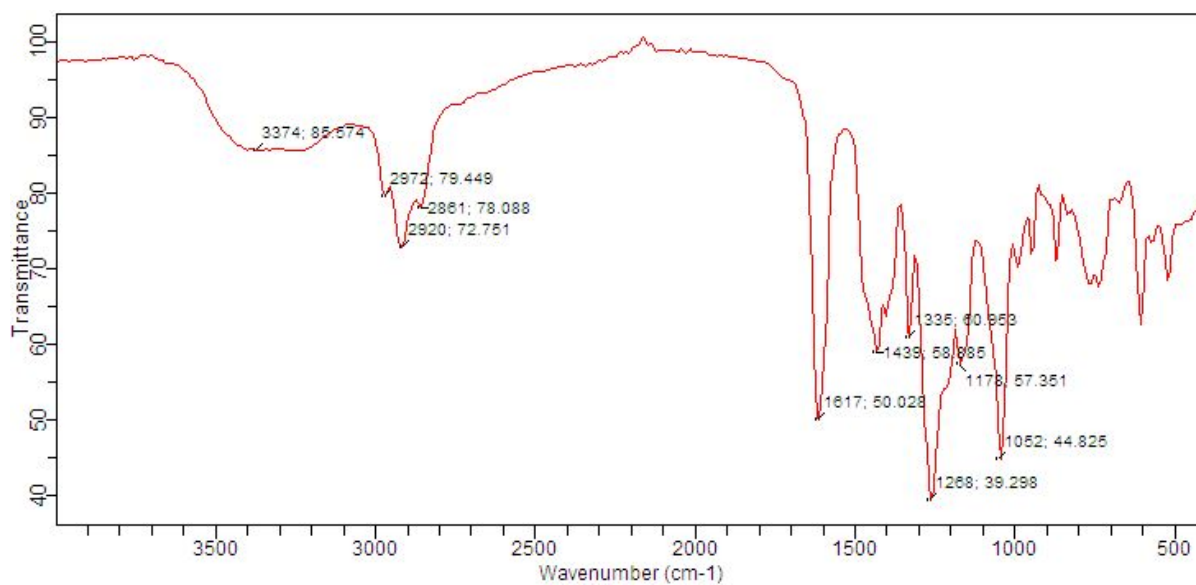

Figure S71: Tuaimenal H (7) IR spectrum (thin film).

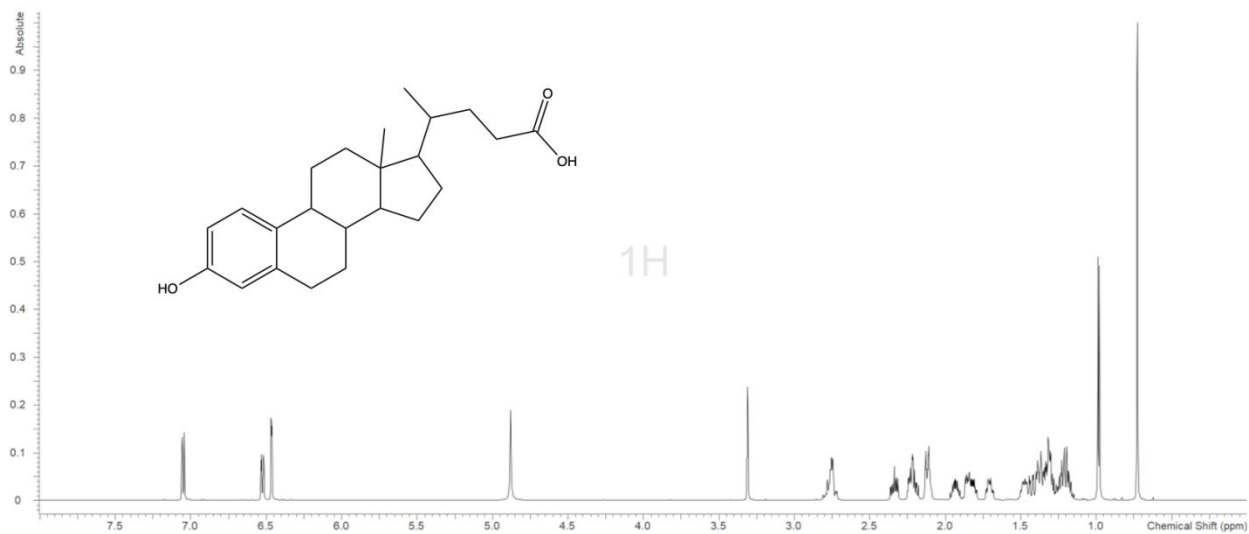

Figure S72: 3-hydroxy-19-norchola-1,3,5(10)-trien-24-oic acid (**8**) <sup>1</sup>H NMR spectrum (600 MHz, MeOD).

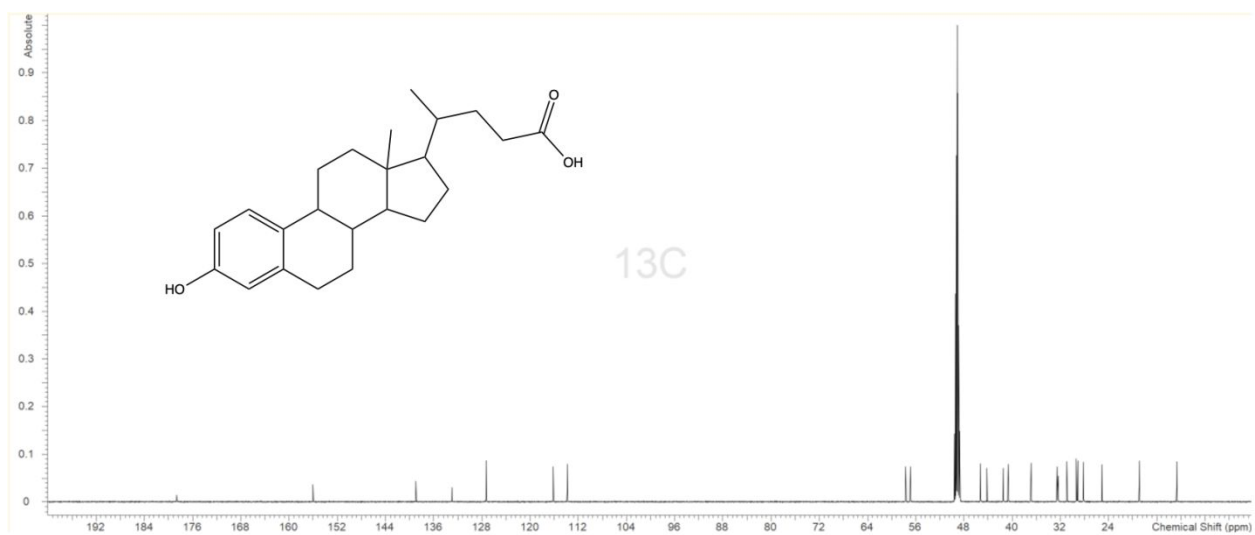

Figure S73: 3-hydroxy-19-norchola-1,3,5(10)-trien-24-oic acid (**8**) <sup>13</sup>C NMR spectrum (150 MHz, MeOD).



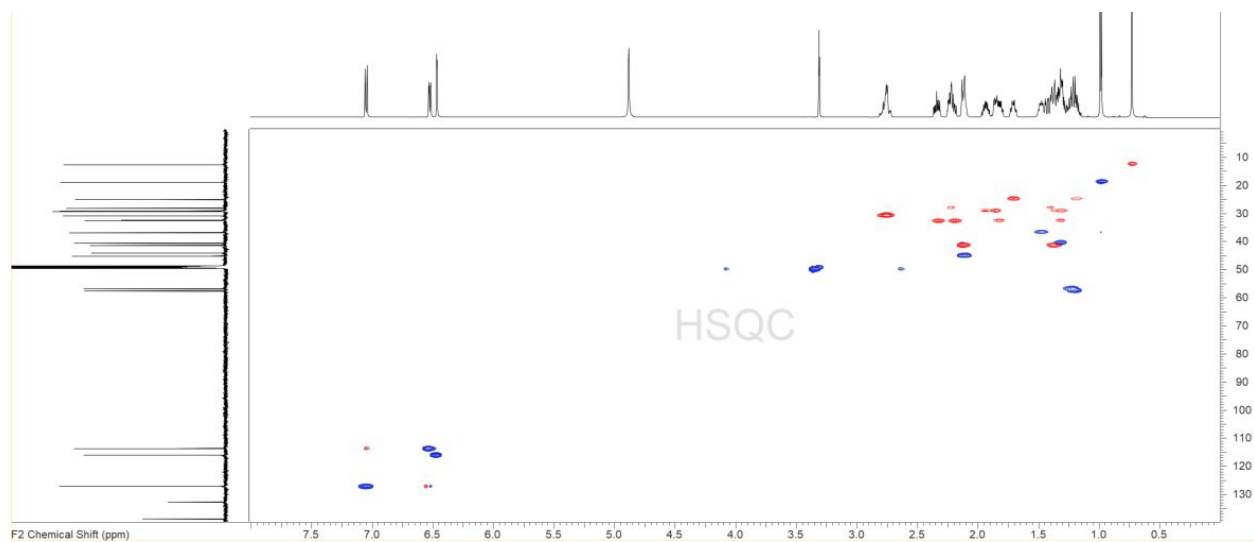

Figure S74: 3-hydroxy-19-norchola-1,3,5(10)-trien-24-oic acid (**8**) HSCQ NMR spectrum (500 MHz, MeOD).

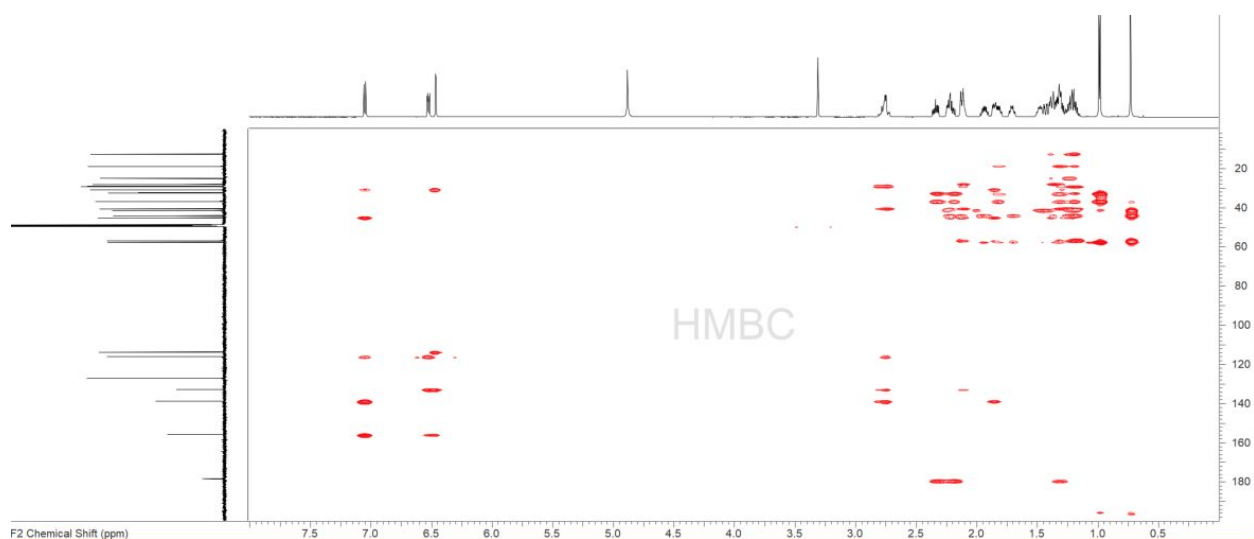

Figure S75: 3-hydroxy-19-norchola-1,3,5(10)-trien-24-oic acid (**8**) HMBC NMR spectrum (500 MHz, MeOD).

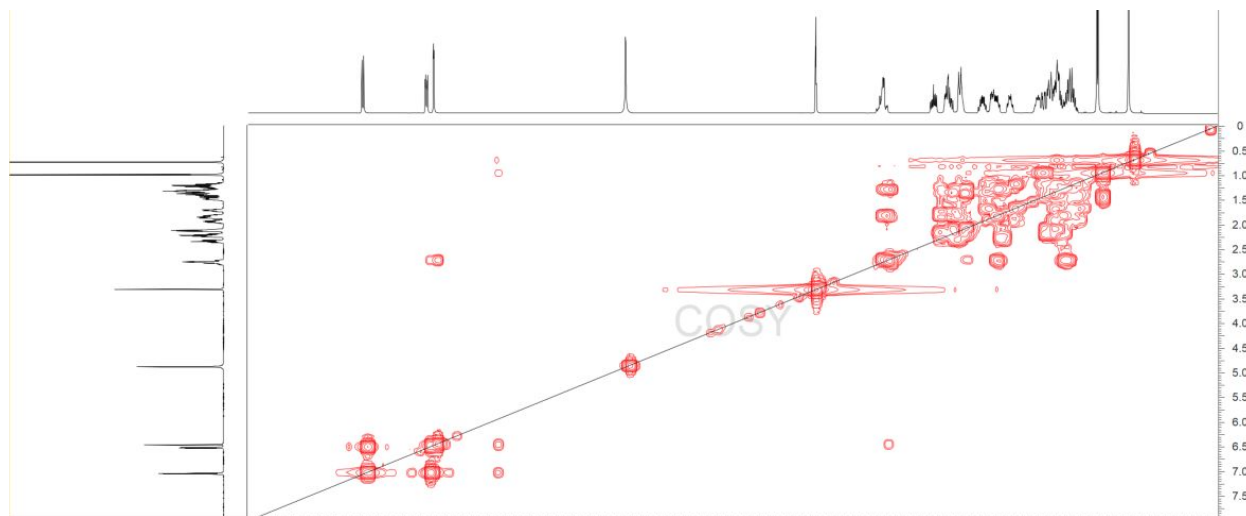

Figure S76: 3-hydroxy-19-norchola-1,3,5(10)-trien-24-oic acid (**8**) COSY NMR spectrum (500 MHz, MeOD).

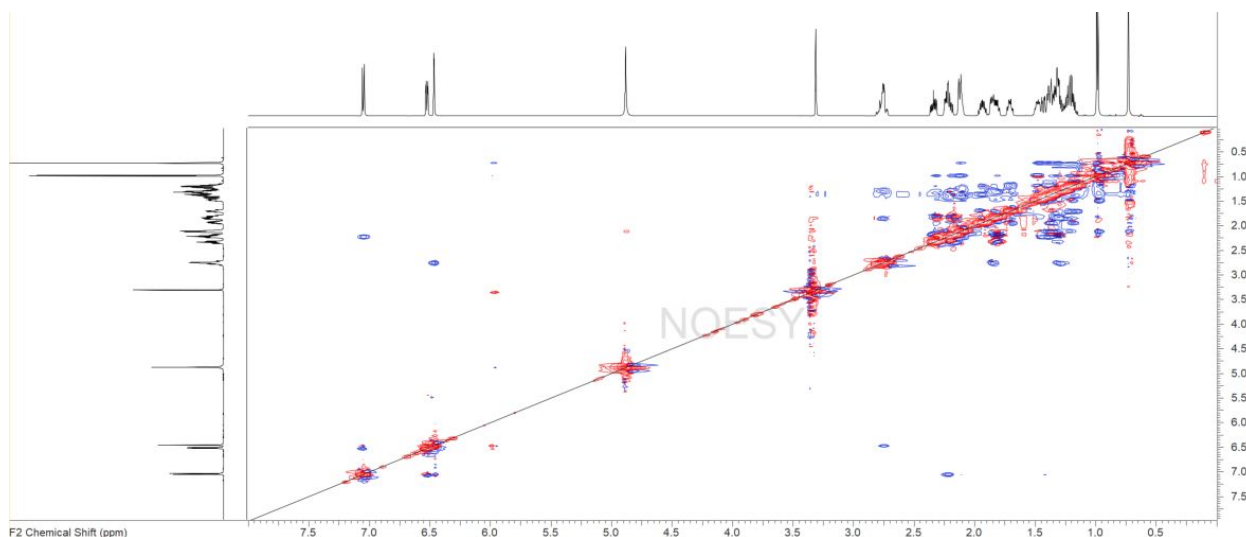

Figure S77: 3-hydroxy-19-norchola-1,3,5(10)-trien-24-oic acid (**8**) NOESY NMR spectrum (500 MHz, MeOD).

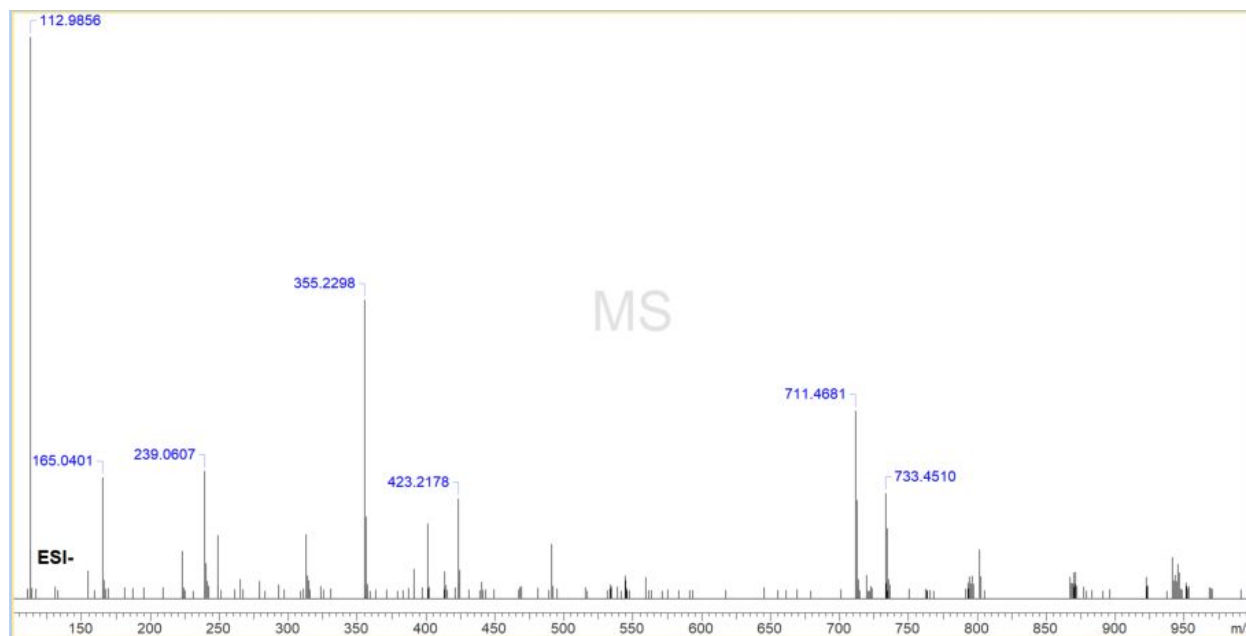

Figure S78: 3-hydroxy-19-norchola-1,3,5(10)-trien-24-oic acid (**8**) HRESIMS (neg).

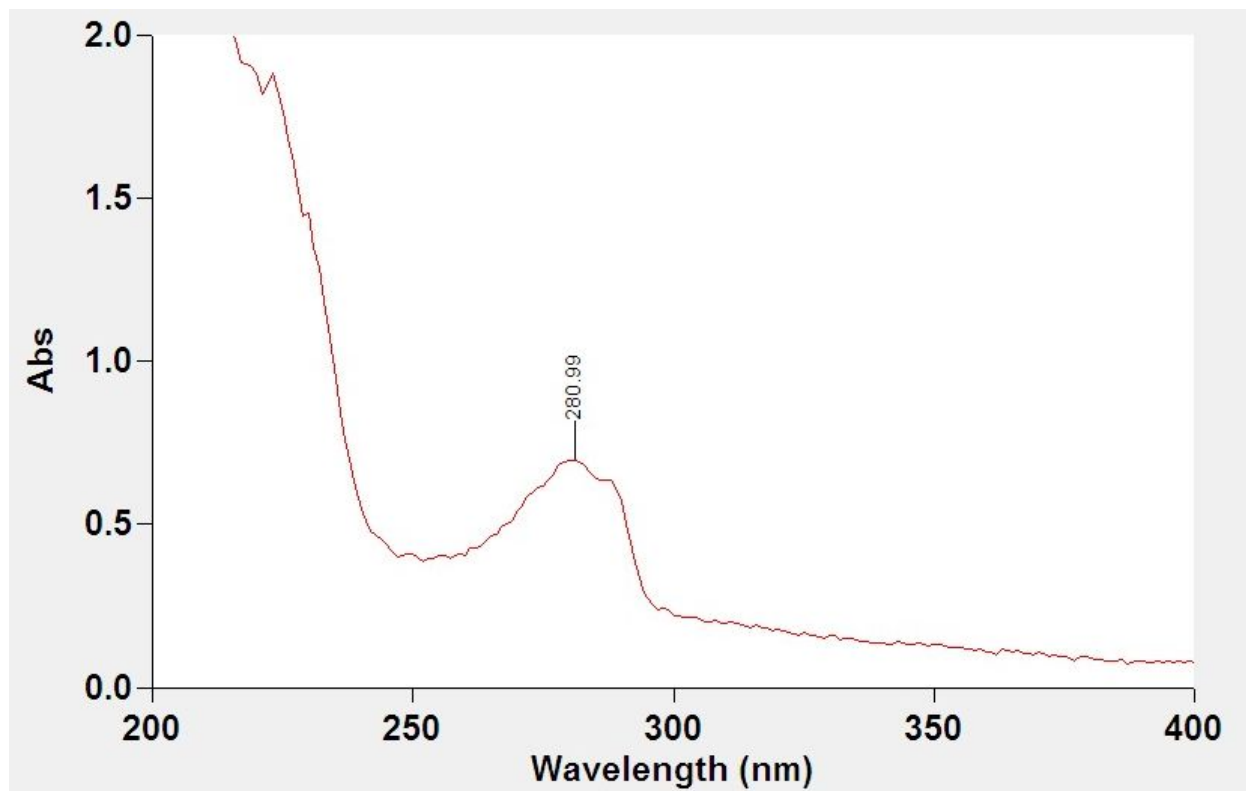

Figure S79: 3-hydroxy-19-norchola-1,3,5(10)-trien-24-oic acid (**8**) UV  $\lambda_{\text{max}}$  ( $\text{C}_2\text{H}_3\text{N}$ ).

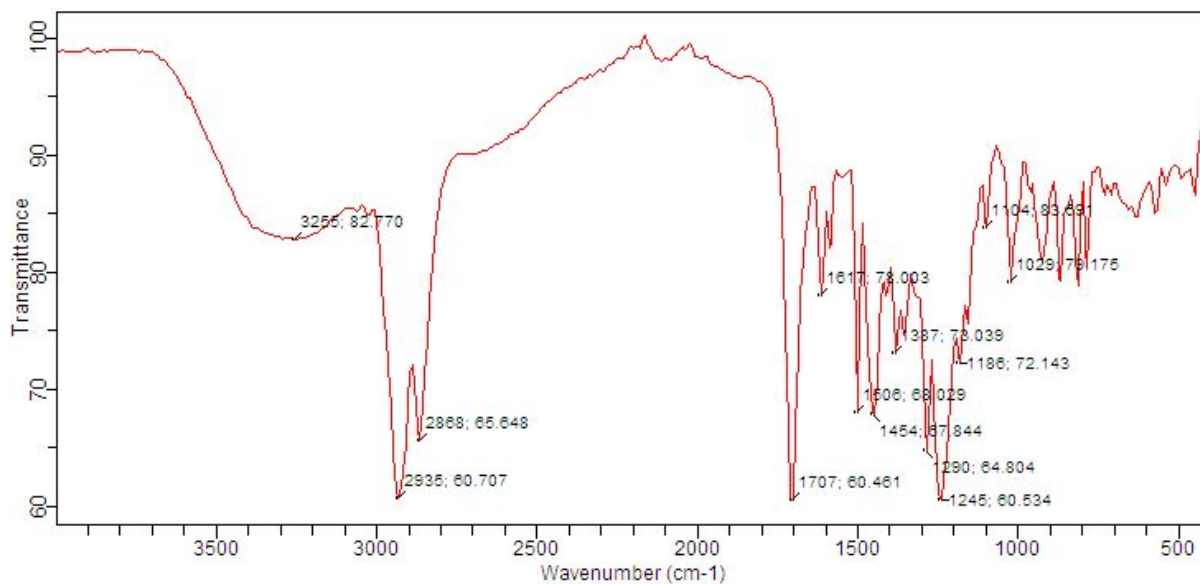

Figure S80: 3-hydroxy-19-norchola-1,3,5(10)-trien-24-oic acid (**8**) IR spectrum (thin film).

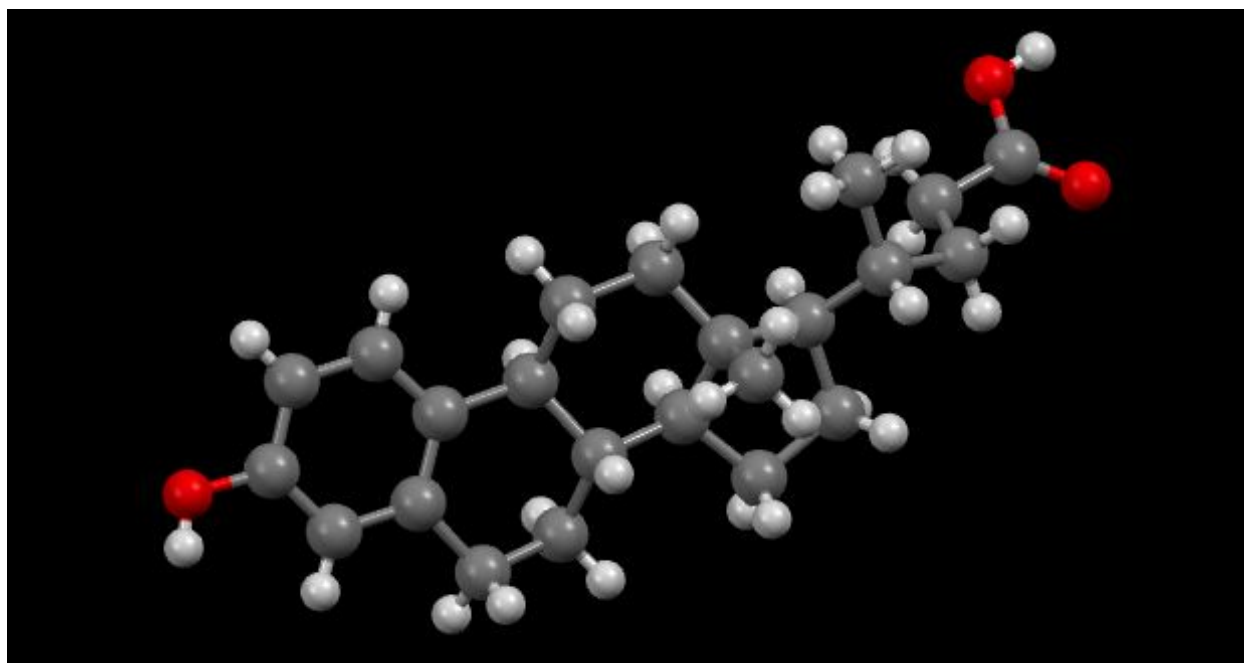

Figure S81: 3-hydroxy-19-norchola-1,3,5(10)-trien-24-oic acid (**8**) X-ray crystal structure.

|                                             |                                                               |
|---------------------------------------------|---------------------------------------------------------------|
| Identification code                         | JTW-045                                                       |
| Empirical formula                           | C <sub>23</sub> H <sub>32</sub> O <sub>3</sub>                |
| Formula weight                              | 356.48                                                        |
| Temperature/K                               | 100                                                           |
| Crystal system                              | orthorhombic                                                  |
| Space group                                 | P2 <sub>1</sub> 2 <sub>1</sub> 2 <sub>1</sub>                 |
| a/Å                                         | 6.46790(10)                                                   |
| b/Å                                         | 9.6023(2)                                                     |
| c/Å                                         | 30.7076(5)                                                    |
| α/°                                         | 90                                                            |
| β/°                                         | 90                                                            |
| γ/°                                         | 90                                                            |
| Volume/Å <sup>3</sup>                       | 1907.15(6)                                                    |
| Z                                           | 4                                                             |
| ρ <sub>calc</sub> /g/cm <sup>3</sup>        | 1.242                                                         |
| μ/mm <sup>-1</sup>                          | 0.629                                                         |
| F(000)                                      | 776.0                                                         |
| Crystal size/mm <sup>3</sup>                | 0.2 × 0.2 × 0.1                                               |
| Radiation                                   | CuKα (λ = 1.54178)                                            |
| 2θ range for data collection/°              | 5.756 to 158.692                                              |
| Index ranges                                | -8 ≤ h ≤ 8, -12 ≤ k ≤ 12, -38 ≤ l ≤ 38                        |
| Reflections collected                       | 44886                                                         |
| Independent reflections                     | 4106 [R <sub>int</sub> = 0.0296, R <sub>sigma</sub> = 0.0141] |
| Data/restraints/parameters                  | 4106/0/245                                                    |
| Goodness-of-fit on F <sup>2</sup>           | 1.080                                                         |
| Final R indexes [I >= 2σ (I)]               | R <sub>1</sub> = 0.0344, wR <sub>2</sub> = 0.0916             |
| Final R indexes [all data]                  | R <sub>1</sub> = 0.0347, wR <sub>2</sub> = 0.0919             |
| Largest diff. peak/hole / e Å <sup>-3</sup> | 0.16/-0.18                                                    |
| Flack parameter                             | 0.00(3)                                                       |

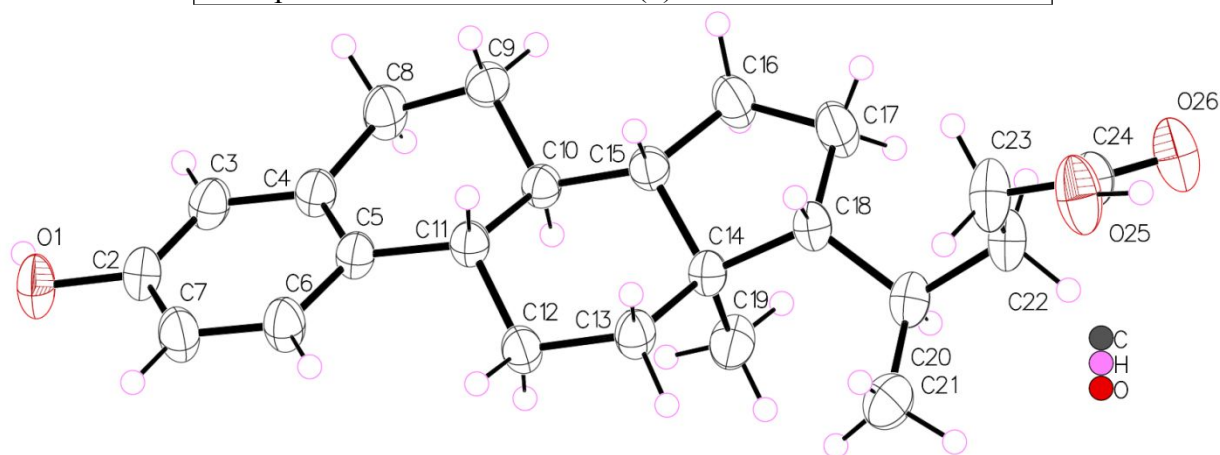

Figure S82: 3-hydroxy-19-norchola-1,3,5(10)-trien-24-oic acid (**8**) X-ray crystallography metadata and ellipsoid plot with anisotropic displacement parameters drawn at 50% probability.

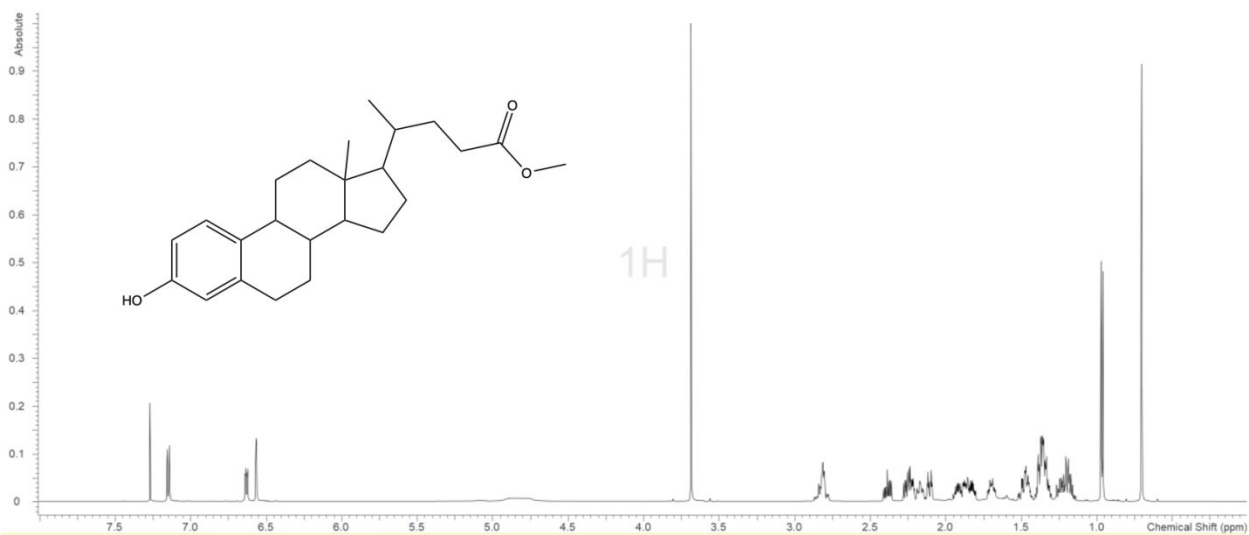

Figure S83: Methyl 3-hydroxy-19-norchola-1,3,5(10)-trien-24-oic acid (**9**)  $^1\text{H}$  NMR spectrum (600 MHz,  $\text{CDCl}_3$ ).

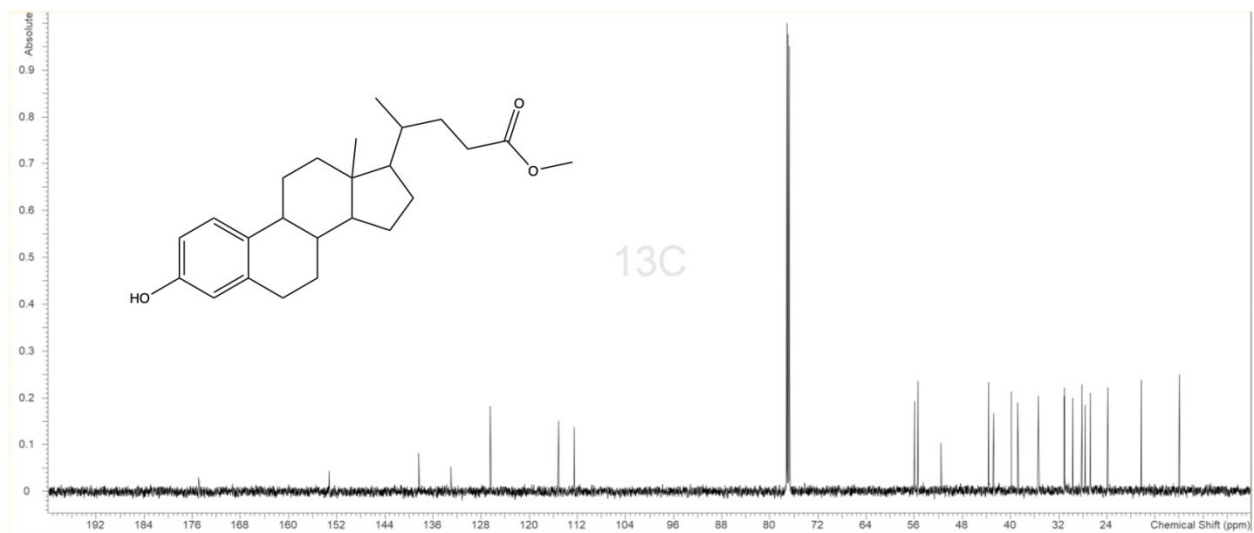

Figure S84: Methyl 3-hydroxy-19-norchola-1,3,5(10)-trien-24-oic acid (**9**)  $^{13}\text{C}$  NMR spectrum (150 MHz,  $\text{CDCl}_3$ ).

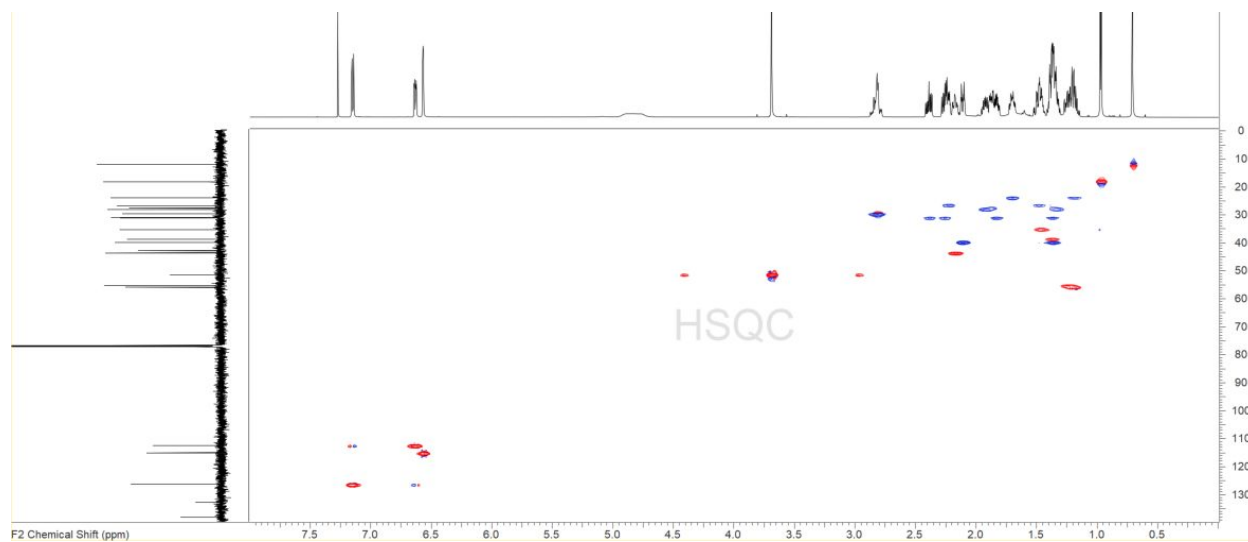

Figure S85: Methyl 3-hydroxy-19-norchola-1,3,5(10)-trien-24-oic acid (**9**) HSCQ NMR spectrum (500 MHz, CDCl<sub>3</sub>).

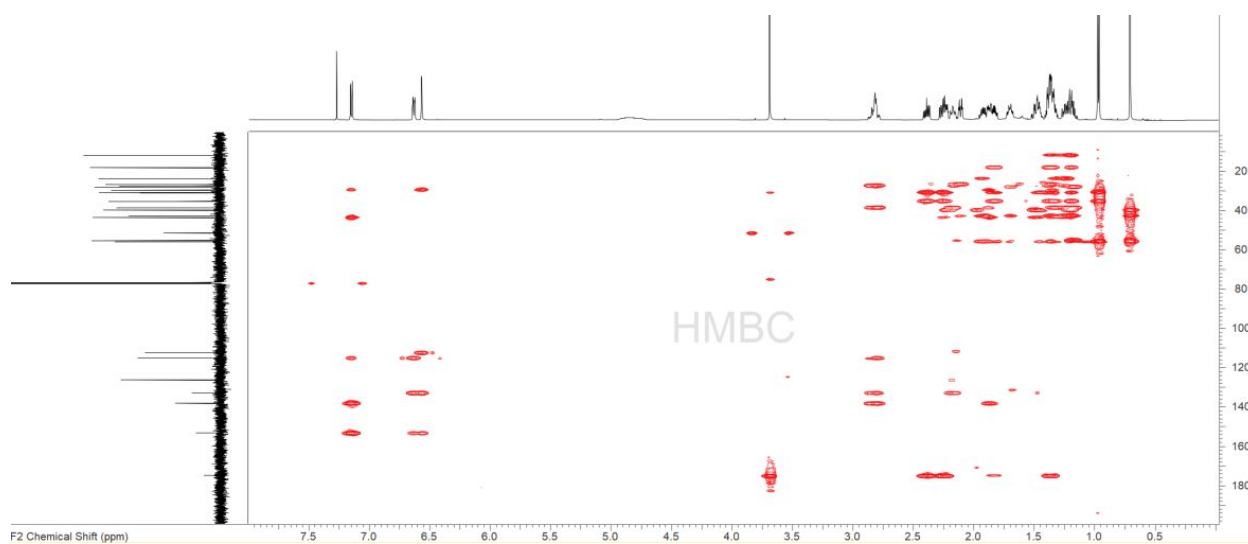

Figure S86: Methyl 30hydroxy-19-norchola-1,3,5(10)-trien-24-oic acid (**9**) HMBC NMR spectrum (500 MHz, CDCl<sub>3</sub>).

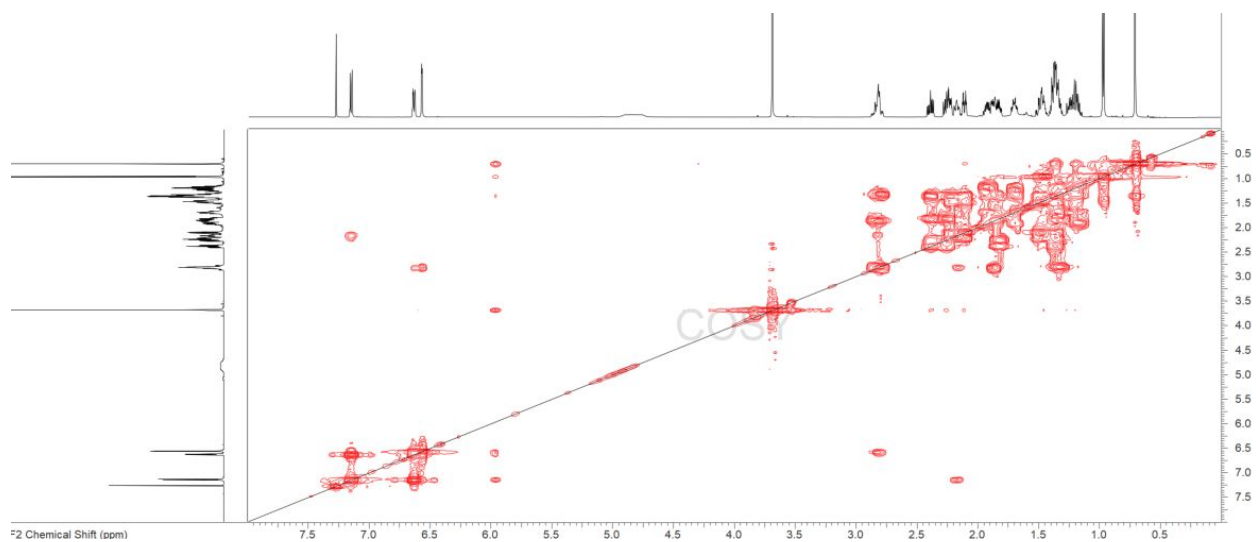

Figure S87: Methyl 3-hydroxy-19-norchola-1,3,5(10)-trien-24-oic acid (**9**) COSY NMR spectrum (500 MHz, CDCl<sub>3</sub>).

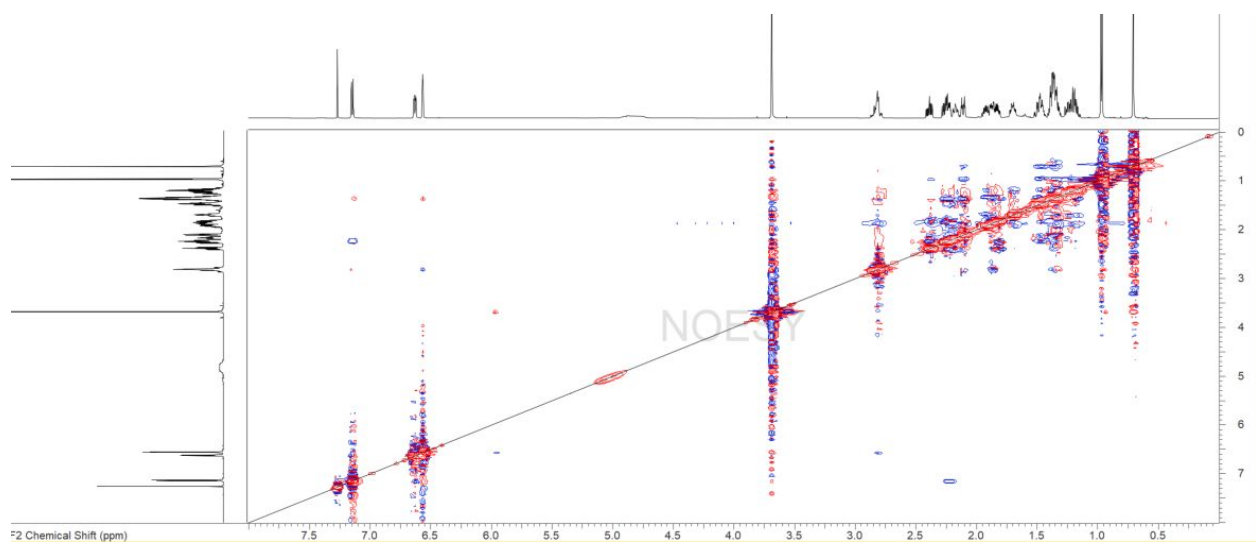

Figure S88: Methyl 3-hydroxy-19-norchola-1,3,5(10)-trien-24-oic acid (**9**) NOESY NMR spectrum (500 MHz, CDCl<sub>3</sub>).



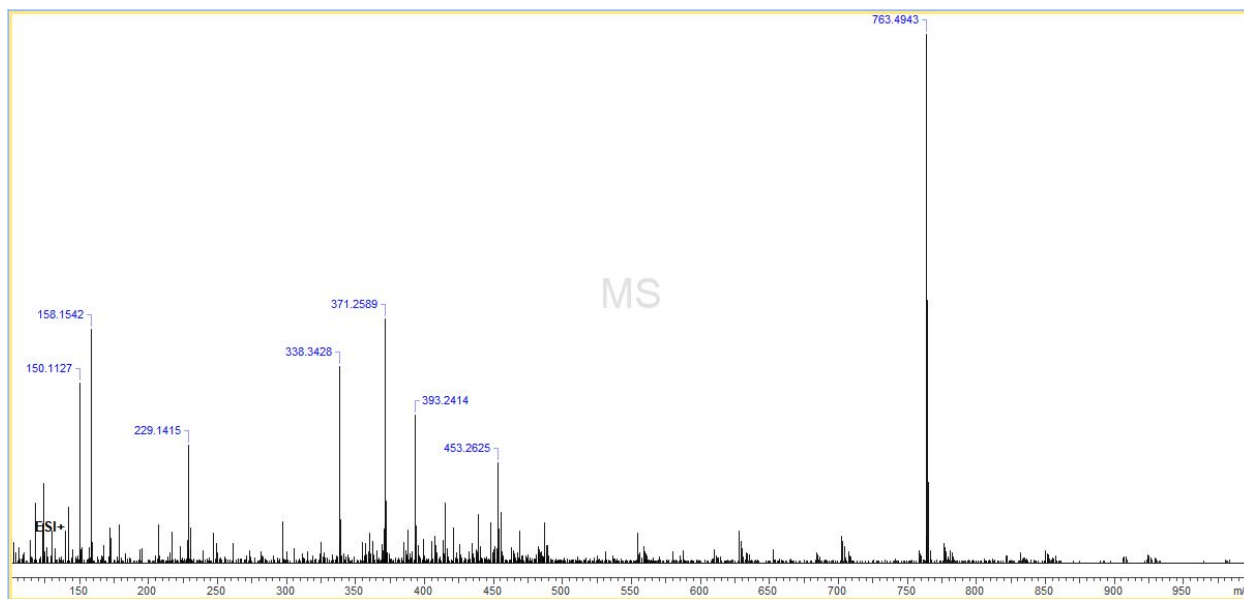

Figure S89: Methyl 3-hydroxy-19-norchola-1,3,5(10)-trien-24-oic acid (**9**) HRESIMS (pos).

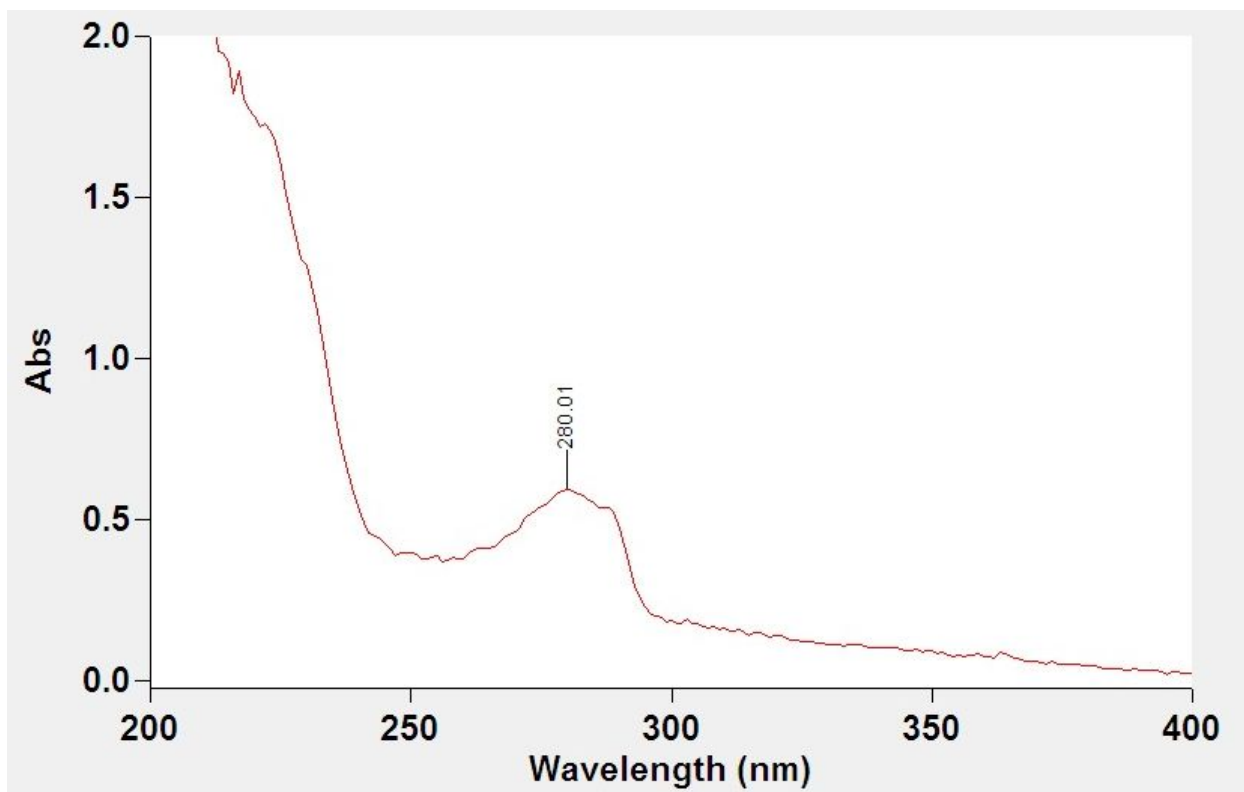

Figure S90: Methyl 3-hydroxy-19-norchola-1,3,5(10)-trien-24-oic acid (**9**) UV  $\lambda_{\text{max}}$  ( $\text{C}_2\text{H}_3\text{N}$ ).

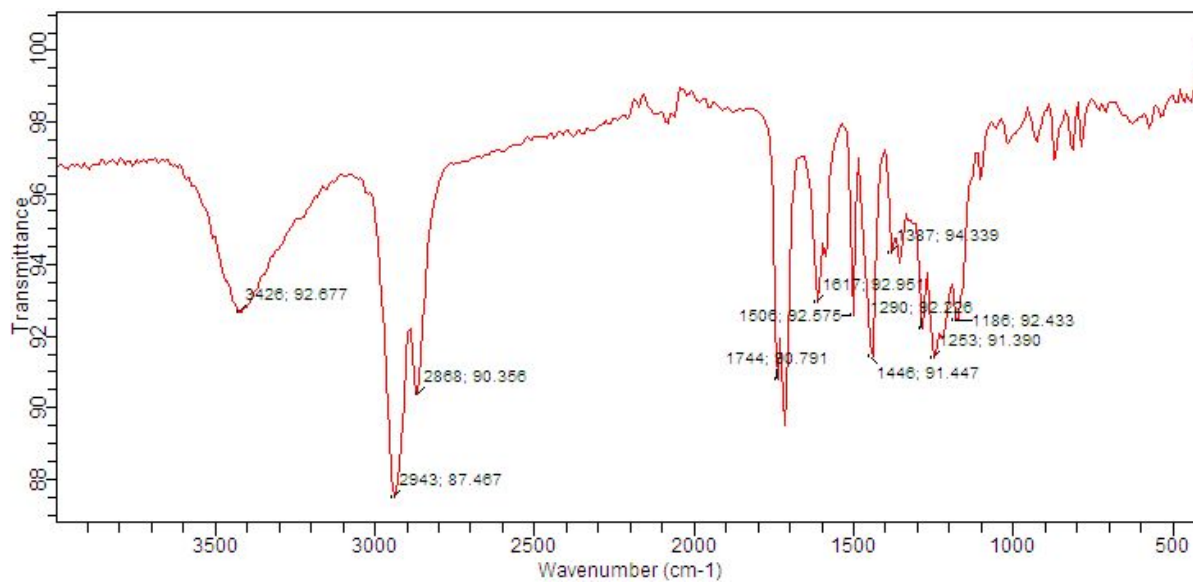

Figure S91: Methyl 3-hydroxy-19-norchola-1,3,5(10)-trien-24-oic acid (**9**) IR spectrum (thin film).

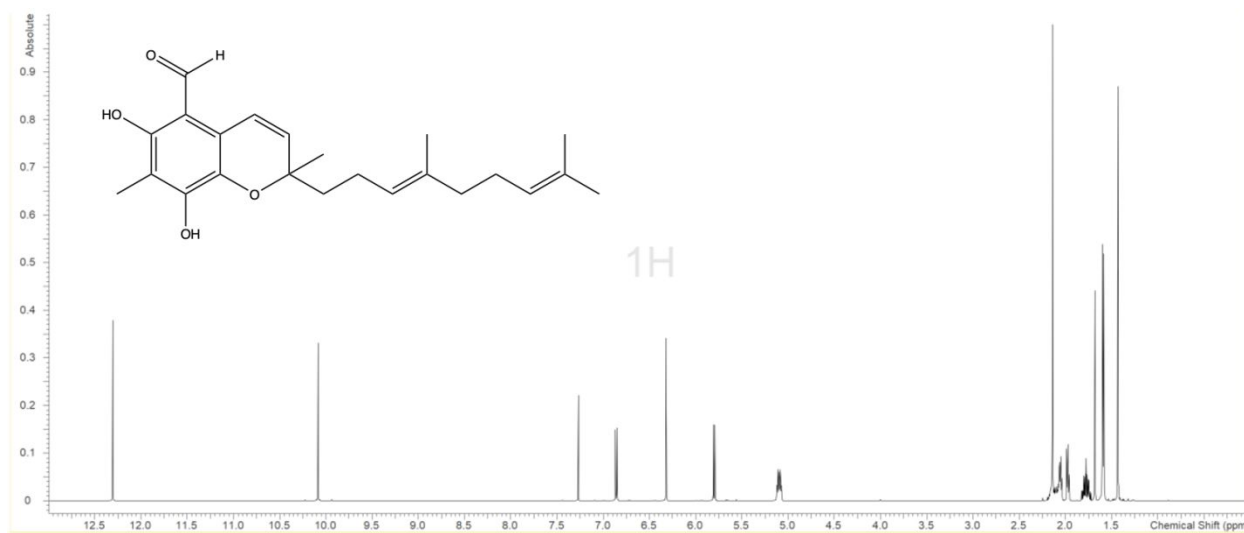

Figure S92: Tuaimenal A (**10**)  $^1\text{H}$  NMR spectrum (600 MHz,  $\text{CDCl}_3$ ).

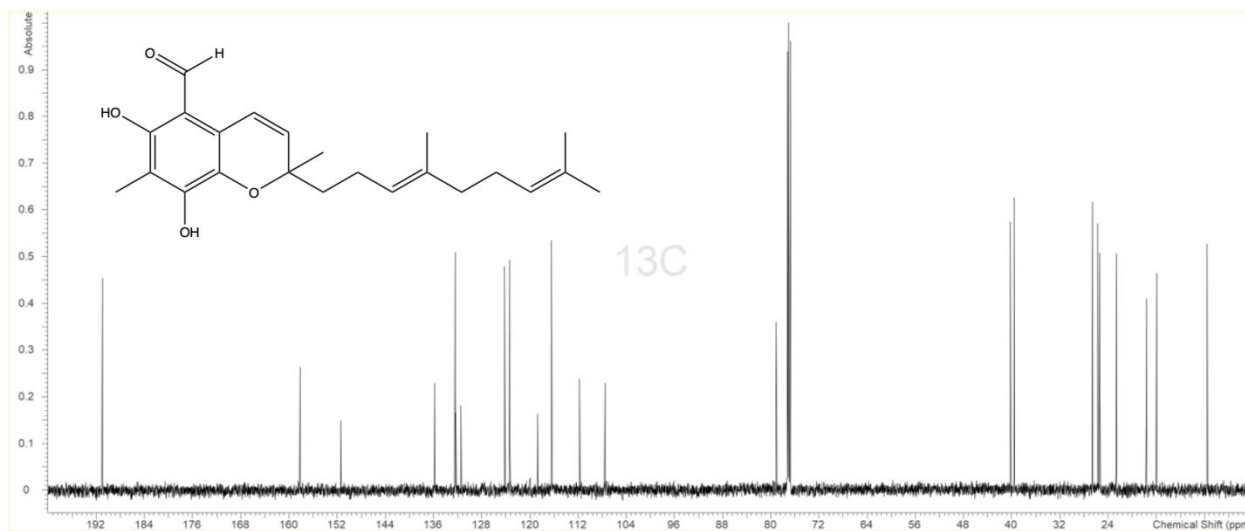

Figure S93: Tuaimenal A (**10**)  $^{13}\text{C}$  NMR spectrum (150 MHz,  $\text{CDCl}_3$ ).

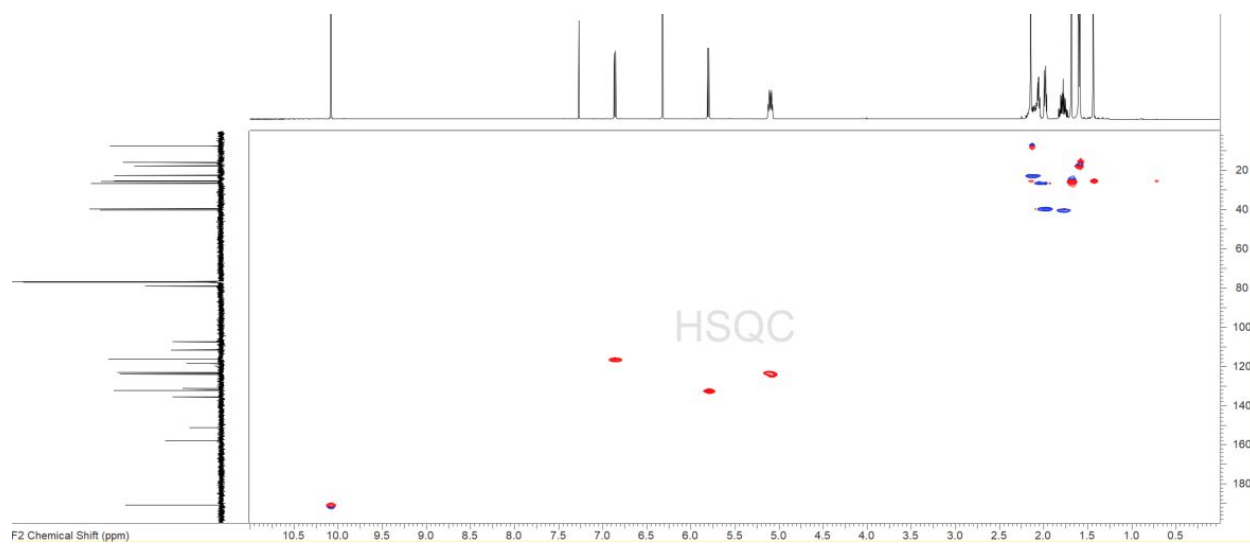

Figure S94: Tuaimenal A (**10**) HSQC NMR spectrum (500 MHz,  $\text{CDCl}_3$ ).

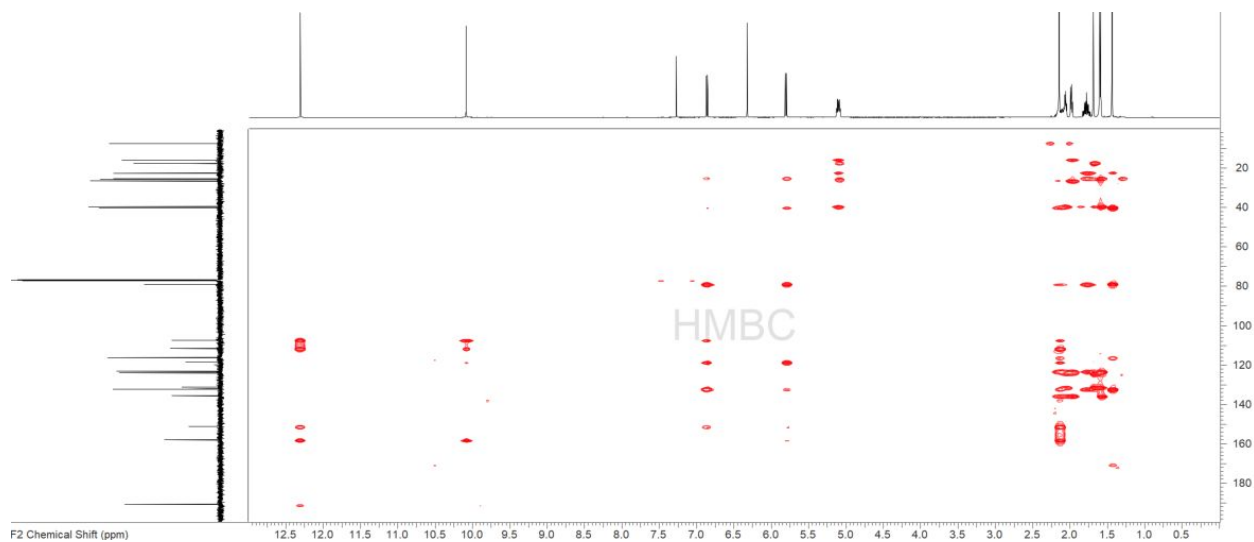

Figure S95: Tuaimenal A (**10**) HMBC NMR spectrum (500 MHz, CDCl<sub>3</sub>).

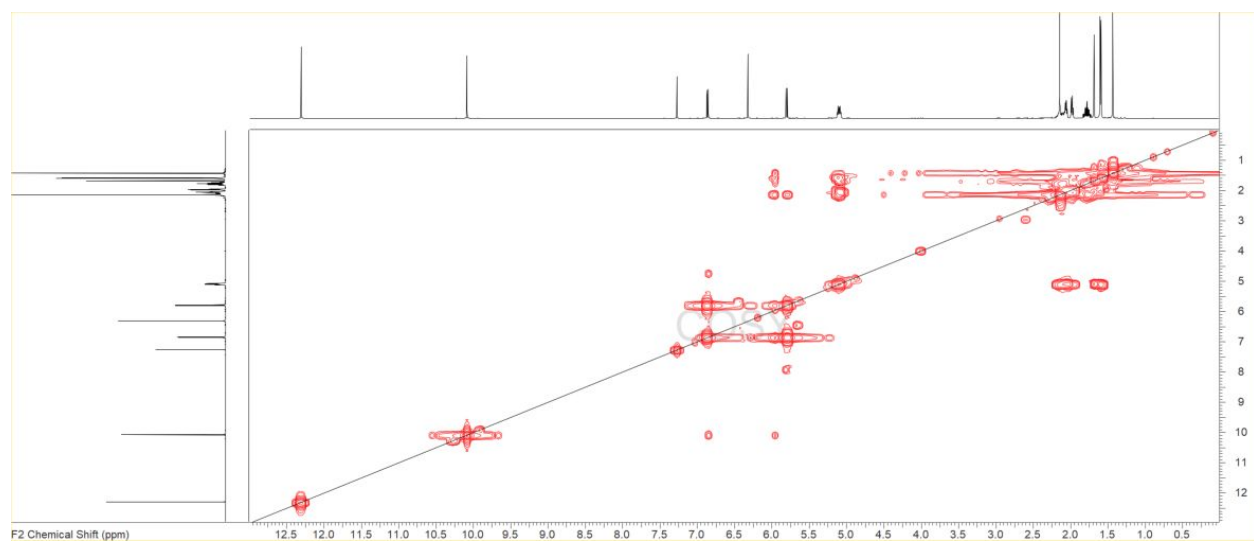

Figure S96: Tuaimenal A (**10**) COSY NMR spectrum (500 MHz, CDCl<sub>3</sub>).

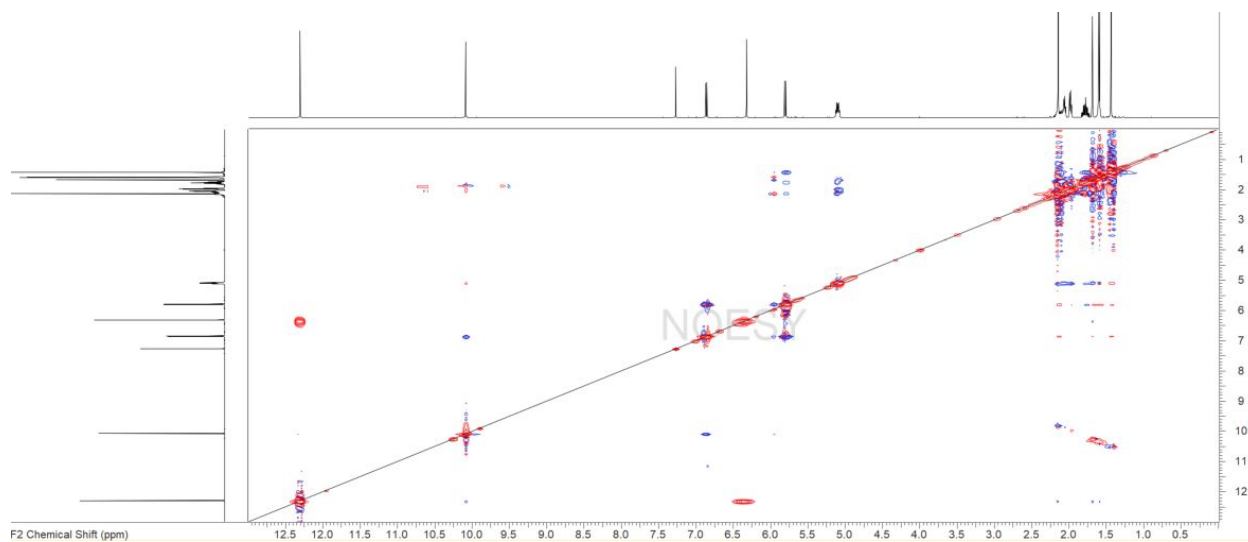

Figure S97: Tuaimenal A (**10**) NOESY NMR spectrum (500 MHz, CDCl<sub>3</sub>).

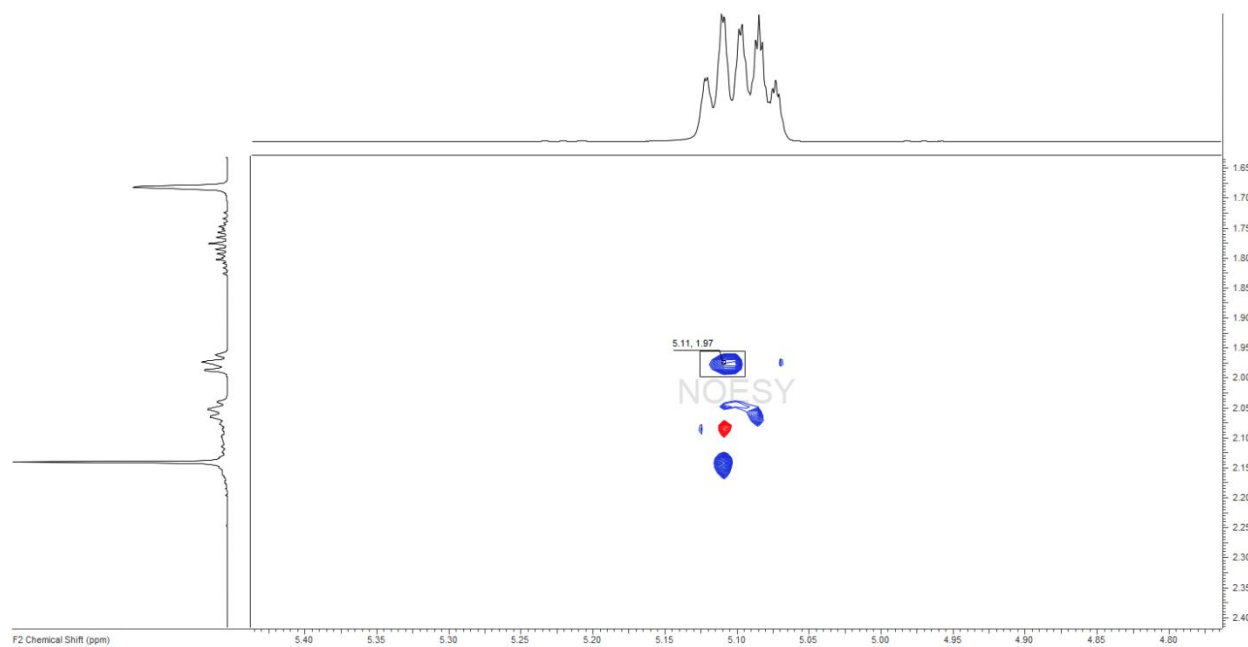

Figure S98: Tuaimenal A (**10**) zoomed NOESY NMR spectrum (500 MHz, CDCl<sub>3</sub>).

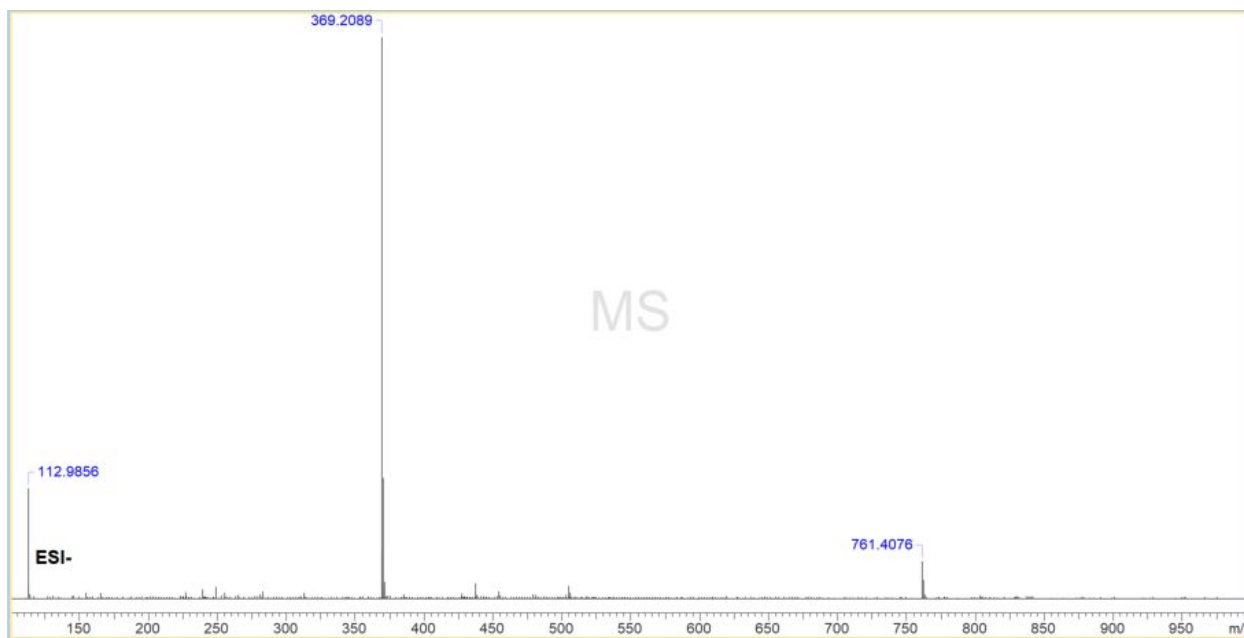

Figure S99: Tuaimenal A (**10**) HRESIMS (neg).

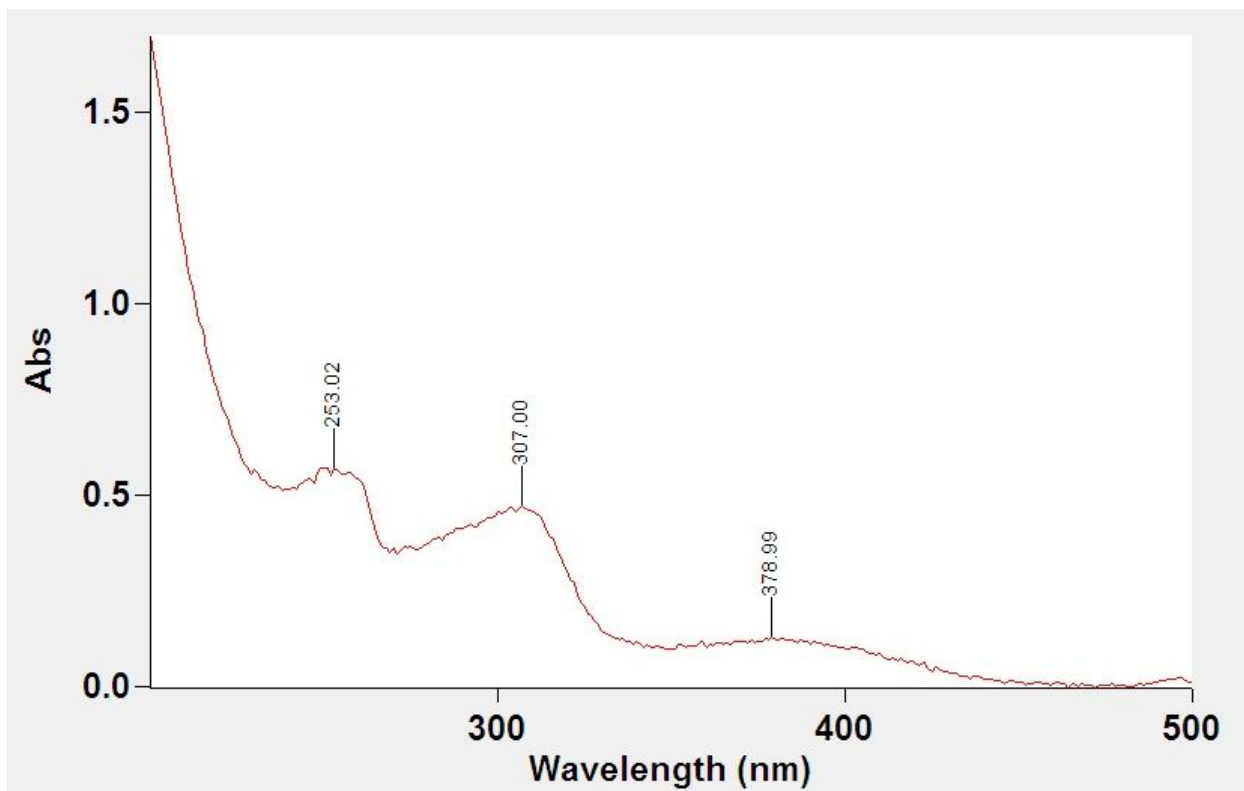

Figure S100: Tuaimenal A (**10**) UV  $\lambda_{\text{max}}$  ( $\text{C}_2\text{H}_3\text{N}$ ).

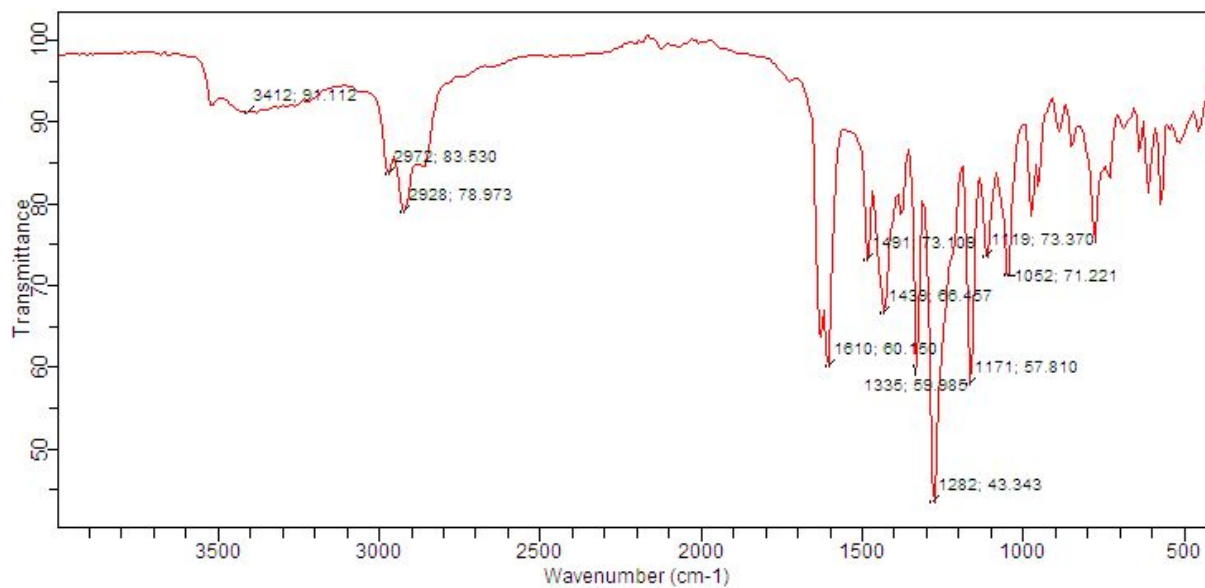

Figure S101: Tuaimenal A (**10**) IR spectrum (thin film).

Table S1: Comparison of tuaimenal A (**10**)  $^1\text{H}$  and  $^{13}\text{C}$  NMR spectra to literature.

| <b>Tuaimenal A<sup>a</sup></b> |                                                  |                                           |                                                    |                                             |
|--------------------------------|--------------------------------------------------|-------------------------------------------|----------------------------------------------------|---------------------------------------------|
| Pos                            | Literature $\delta_{\text{C}}^{\text{b}}$ , type | Literature $\delta_{\text{H}}^{\text{c}}$ | Experimental $\delta_{\text{C}}^{\text{b}}$ , type | Experimental $\delta_{\text{H}}^{\text{c}}$ |
| 1                              | 132.3, C                                         |                                           | 132.3, C                                           |                                             |
| 2                              | 151.4, C                                         |                                           | 151.4, C                                           |                                             |
| 3                              | 111.7, C                                         |                                           | 111.7, C                                           |                                             |
| 4                              | 158.2, C                                         |                                           | 158.2, C                                           |                                             |
| 5                              | 107.5, C                                         |                                           | 107.6, C                                           |                                             |
| 6                              | 118.7, C                                         |                                           | 118.7, C                                           |                                             |
| 7                              | 116.4, CH                                        | 6.86, d (10.1)                            | 116.4, CH                                          | 6.86, d (10.2)                              |
| 8                              | 132.4, CH                                        | 5.80, d (10.1)                            | 132.4, CH                                          | 5.80, d (9.1)                               |
| 9                              | 79.1, C                                          |                                           | 79.1, C                                            |                                             |
| 10                             | 40.2, CH <sub>2</sub>                            | 1.78, m                                   | 40.2, CH <sub>2</sub>                              | 1.78, m                                     |
| 11                             | 22.6, CH <sub>2</sub>                            | 2.13, m                                   | 22.6, CH <sub>2</sub>                              | 2.12, m                                     |
| 12                             | 123.3, CH                                        | 5.11, t                                   | 123.3, CH                                          | 5.11, t                                     |
| 13                             | 135.8, C                                         |                                           | 135.8, C                                           |                                             |
| 14                             | 39.6, CH <sub>2</sub>                            | 1.99, t                                   | 39.6, CH <sub>2</sub>                              | 1.97, t                                     |
| 15                             | 26.6, CH <sub>2</sub>                            | 2.05, m                                   | 26.6, CH <sub>2</sub>                              | 2.05, m                                     |
| 16                             | 124.1, CH                                        | 5.07, t                                   | 124.2, CH                                          | 5.08, t                                     |
| 17                             | 131.4, CH                                        |                                           | 131.4, CH                                          |                                             |
| 18                             | 17.7, CH <sub>3</sub>                            | 1.59, s                                   | 17.6, CH <sub>3</sub>                              | 1.60, s                                     |
| 19                             | 25.7, CH <sub>3</sub>                            | 1.68, s                                   | 25.7, CH <sub>3</sub>                              | 1.68, s                                     |
| 20                             | 16.0, CH <sub>3</sub>                            | 1.58, s                                   | 16.0, CH <sub>3</sub>                              | 1.58, s                                     |
| 21                             | 25.4, CH <sub>3</sub>                            | 1.43, s                                   | 25.4, CH <sub>3</sub>                              | 1.43, s                                     |
| 22                             | 7.6, CH <sub>3</sub>                             | 2.14, s                                   | 7.5, CH <sub>3</sub>                               | 2.14, s                                     |
| 23                             | 191.1, CH                                        | 10.08, s                                  | 191.0, CH                                          | 10.08, s                                    |
| OH <sub>a</sub>                |                                                  | 12.31, s                                  |                                                    | 12.31, s                                    |
| OH <sub>b</sub>                |                                                  | 6.37, s                                   |                                                    | 6.32, s                                     |

<sup>a</sup> CDCl<sub>3</sub>, ppm; <sup>b</sup> 150 MHz; <sup>c</sup> 600 MHz, multiplicity, (*J* (Hz))



Table S2: Comparison of *Duva florida* steroids (**8** and **9**) <sup>13</sup>C NMR spectra to literature.

| Pos | Cmpd <b>8</b> Literature<br>$\delta_C^b$ , type | Cmpd <b>8</b> Experimental<br>$\delta_C^c$ , type | Cmpd <b>9</b> Experimental<br>$\delta_C^c$ , type |
|-----|-------------------------------------------------|---------------------------------------------------|---------------------------------------------------|
| 1   | 127.0                                           | 127.3                                             | 126.4                                             |
| 2   | 113.5                                           | 113.8                                             | 112.6                                             |
| 3   | 156.7                                           | 156.0                                             | 153.3                                             |
| 4   | 115.9                                           | 116.2                                             | 115.2                                             |
| 5   | 139.7                                           | 138.9                                             | 138.3                                             |
| 6   | 30.8                                            | 30.9                                              | 29.7                                              |
| 7   | 28.9                                            | 29.1                                              | 27.6                                              |
| 8   | 40.4                                            | 40.6                                              | 38.8                                              |
| 9   | 45.2                                            | 45.2                                              | 43.7                                              |
| 10  | 133.5                                           | 132.9                                             | 133.0                                             |
| 11  | 27.8                                            | 28.2                                              | 26.7                                              |
| 12  | 41.3                                            | 41.5                                              | 39.9                                              |
| 13  | 44.6                                            | 44.2                                              | 42.8                                              |
| 14  | 57.0                                            | 56.9                                              | 55.4                                              |
| 15  | 29.2                                            | 29.4                                              | 23.9                                              |
| 16  | 24.8                                            | 25.1                                              | 28.2                                              |
| 17  | 57.4                                            | 57.7                                              | 56.0                                              |
| 18  | 12.4                                            | 12.7                                              | 12.0                                              |
| 20  | 37.2                                            | 36.9                                              | 35.4                                              |
| 21  | 18.9                                            | 18.9                                              | 18.3                                              |
| 22  | 34.0                                            | 32.6                                              | 31.1                                              |
| 23  | 36.3                                            | 32.4                                              | 31.0                                              |
| 24  | 167.5                                           | 178.6                                             | 175.0                                             |
| 25  |                                                 |                                                   | 51.5                                              |

<sup>a</sup> CDCl<sub>3</sub>, ppm; <sup>b</sup> 125 MHz; <sup>c</sup> 150 MHz

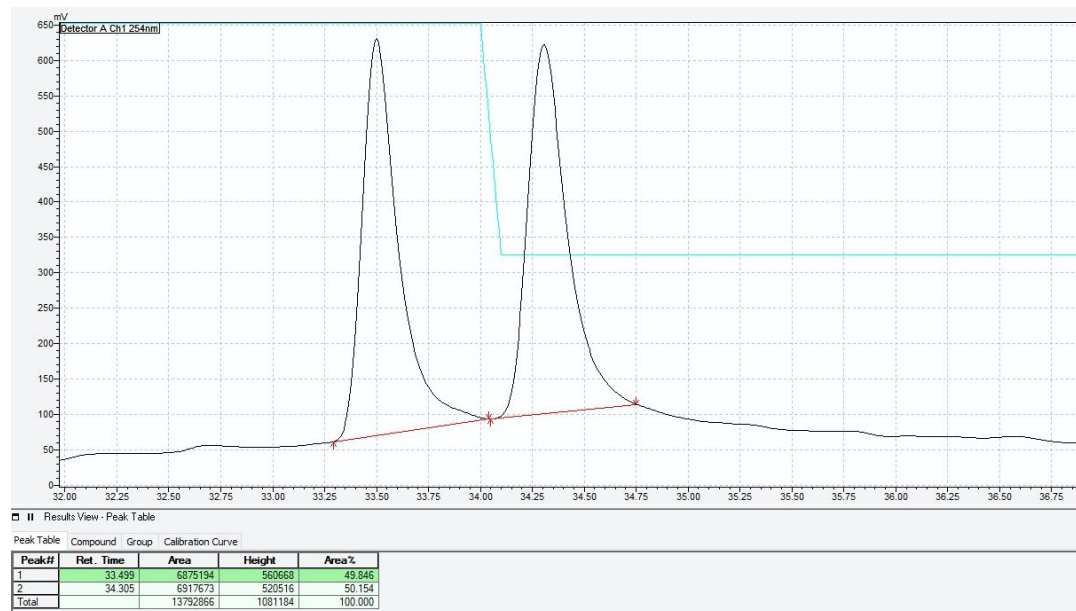

Figure S102: Integrated chromatogram displaying relative abundance of *R* and *S* enantiomers of tuaimenal E (4) separated utilizing a chiral HPLC column.
